# Supplementary material for: A novel double-helical-kernel evolution pattern of gold nanoclusters: alternate single-stranded growth at both ends
Source: Royal Society of Chemistry journal article supplement (doi:10.1039/c6nr09724c), 2017-01-01
Supplement: c6nr09724c1.pdf [file c6nr09724c1.pdf]

## Supporting Information

# Novel Double-helical-kernel Evolution Pattern of Gold Nanoclusters: Alternate Single-standed Growth at Both Ends

Hongwei Dong,<sup>‡<sup>a,b</sup></sup> Lingwen Liao,<sup>‡<sup>a</sup></sup> Shengli Zhuang,<sup>‡<sup>a,b</sup></sup> Chuanhao Yao,<sup>a</sup> Jishi Chen,<sup>a</sup> Shubo Tian,<sup>a</sup> Min Zhu,<sup>a,b</sup> Xu Liu,<sup>a,b</sup> Lingling Li,<sup>c</sup> and Zhikun Wu\*<sup>a</sup>

<sup>a</sup> Key Laboratory of Materials Physics, Anhui Key Laboratory of Nanomaterials and Nanotechnology, CAS Center for Excellence in Nanoscience, Institute of Solid State Physics, Chinese Academy of Sciences, Hefei, Anhui 230031, China

<sup>b</sup> University of Science and Technology of China, Hefei, Anhui 230026, China

<sup>c</sup> Instrumental Analysis Center, Shanghai Jiaotong University, Shanghai 200240, China

## Experimental

### Chemicals

All chemicals and reagents are commercially available and used as received. The water used in all experiments was ultrapure (resistivity 18.2 MΩ cm), produced with a Milli-Q NANO pure water system. cyclohexanethiol (HS-c-C<sub>6</sub>H<sub>11</sub>, 97%, Aldrich), Sodiumborohydride (NaBH<sub>4</sub>, 99.0%) were purchased from Sigma-Aldrich. Tetrachloroauric(III) acid (HAuCl<sub>4</sub>·4H<sub>2</sub>O, 99.7%), tetrahydrofuran (THF, 99.0%), acetonitrile (CH<sub>3</sub>CN, 99.0%), methanol (CH<sub>3</sub>OH, 99.5%), dichloromethane (AR), petroleum ether (AR) and toluene (99.5%) were purchased from Sinopharm chemical reagent co., ltd.

### Synthesis of Au<sub>34</sub>(S-c-C<sub>6</sub>H<sub>11</sub>)<sub>22</sub> and Au<sub>42</sub>(S-c-C<sub>6</sub>H<sub>11</sub>)<sub>26</sub> nanoclusters.

The Au<sub>34</sub>(S-c-C<sub>6</sub>H<sub>11</sub>)<sub>22</sub> and Au<sub>42</sub>(S-c-C<sub>6</sub>H<sub>11</sub>)<sub>26</sub> clusters were synthesized by a two-step size focusing method with some modifications.<sup>1</sup>

**Step 1:** Synthesis of Au<sub>x</sub>(S-c-C<sub>6</sub>H<sub>11</sub>)<sub>y</sub>. First, 0.125 mmol of HAuCl<sub>4</sub> was dissolved in 5 mL of THF, and the solution was cooled down to 0°C. Then, 0.625 mmol of cyclohexanethiol (5 equivalents per mole of Au) was added to the resulting solution. Approximately half an hour later, the color of the tetrahydrofuran phase changed from orange to light yellow, indicating that the Au(III) was reduced to Au(I). To ensure complete complex formation, the reaction was allowed to proceed for another half hour. Then, 1.25 mmol of NaBH<sub>4</sub> dissolved in 5 mL of cold nanopure H<sub>2</sub>O was quickly poured into the Au-S-c-C<sub>6</sub>H<sub>11</sub> mixture under vigorous stirring. Approximately three hours later, the crude Au<sub>x</sub>(S-c-C<sub>6</sub>H<sub>11</sub>)<sub>y</sub> nanoclusters were precipitated out by the addition of excess methanol.

**Step 2:** The crude Au<sub>x</sub>(S-c-C<sub>6</sub>H<sub>11</sub>)<sub>y</sub> nanoclusters obtained from step 1 and 310 μL of cyclohexanethiol were dissolved in 1.5 mL of dichloromethane. The solution was heated to 40°C under gentle stirring. After 41 hours, the reaction was stopped by

adding excess methanol. This mixture was washed with methanol (4-10 times); during this procedure, the redundant cyclohexanethiol, inorganic salt traces and other byproducts were thoroughly removed through centrifugation at 8000 rpm for 2 min. Next, the crude products were separated by preparative thin layer chromatography (developing solvent: dichloromethane:petroleum ether = 1:3, V/V), and  $\text{Au}_{34}(\text{S-c-C}_6\text{H}_{11})_{22}$  and  $\text{Au}_{42}(\text{S-c-C}_6\text{H}_{11})_{26}$  nanoclusters were extracted with  $\text{CH}_2\text{Cl}_2$  from the cut silica gel. Several days later,  $\text{Au}_{34}(\text{S-c-C}_6\text{H}_{11})_{22}$  nanoclusters were recrystallized from a solution of toluene/acetonitrile, while  $\text{Au}_{42}(\text{S-c-C}_6\text{H}_{11})_{26}$  nanoclusters were recrystallized from a solution of toluene/methanol at room temperature.

- 1 (a) Zeng, C.; Chen, Y.; Liu, C.; Nobusada, K.; Rosi, N. L.; Jin, R. *Sci. Adv.* **2015**, *1*, e1500425. (b) Zeng, C. J.; Liu, C.; Chen, Y. X.; Rosi, N. L.; Jin, R. C. *J. Am. Chem. Soc.* **2016**, *138*, 8710; (c) Zeng, C. J.; Chen, Y. X.; Iida, K.; Nobusada, K.; Kirschbaum, K.; Lambright, K. J.; Jin, R. C. *J. Am. Chem. Soc.* **2016**, *138*, 3950 (d) Liao, L.; Chen, J.; Wang, C.; Zhuang, S.; Yan, N.; Yao, C.; Xia, N.; Li, L.; Bao, X.; Wu, Z. *Chem. Commun.* **2016**, *52*, 12036; (e) Liao, L.; Yao, C.; Wang, C.; Tian, S.; Chen, J.; Li, M.-B.; Xia, N.; Yan, N.; Wu, Z. *Anal. Chem.* **2016**, *88*, 11297.

## Figures

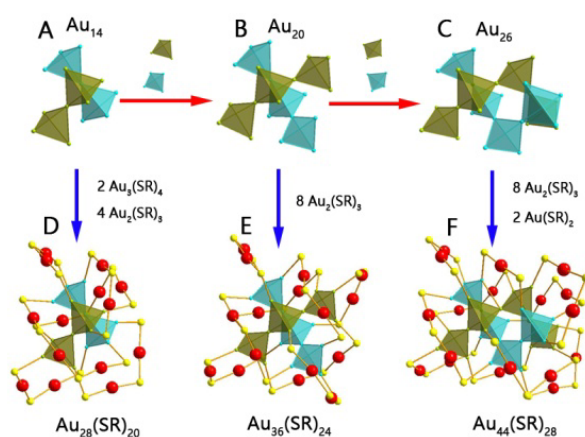

Figure S1. The kernel and total structures of  $\text{Au}_{28}(\text{TBBT})_{20}$ ,  $\text{Au}_{36}(\text{TBBT})_{24}$  and  $\text{Au}_{44}(\text{TBBT})_{28}$ :  $\text{Au}_{14}$  kernel of  $\text{Au}_{28}(\text{TBBT})_{20}$  (A);  $\text{Au}_{20}$  kernel of  $\text{Au}_{36}(\text{TBBT})_{24}$  (B);  $\text{Au}_{26}$  kernel of  $\text{Au}_{44}(\text{TBBT})_{28}$  (C);  $\text{Au}_{28}(\text{TBBT})_{20}$  framework (D);  $\text{Au}_{36}(\text{TBBT})_{24}$  framework (E); and  $\text{Au}_{44}(\text{TBBT})_{28}$  framework (F). For clarity, C and H atoms are omitted. Color labels: yellow = S; others = Au.

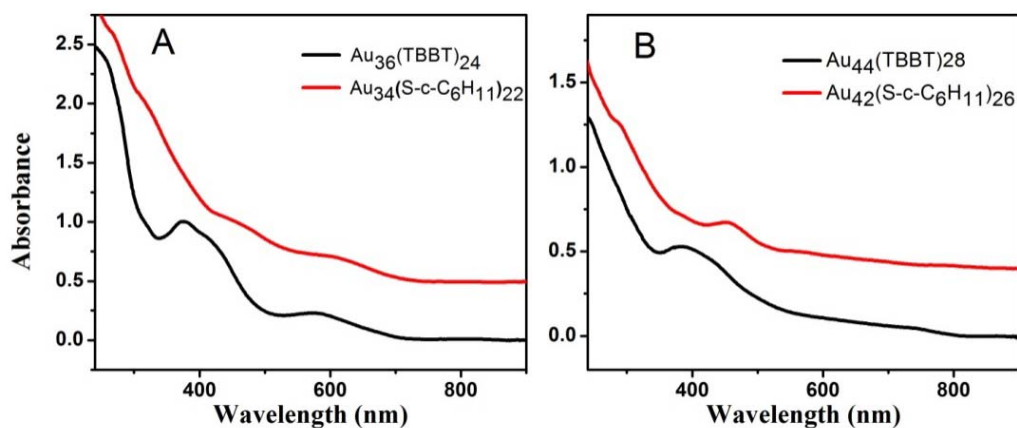

Figure S2. (A) Optical spectra of Au<sub>36</sub>(TBBT)<sub>24</sub> (black profile) and Au<sub>34</sub>(S-c-C<sub>6</sub>H<sub>11</sub>)<sub>22</sub> (red); (B) Optical spectra of Au<sub>44</sub>(TBBT)<sub>28</sub> (black profile) and Au<sub>42</sub>(S-c-C<sub>6</sub>H<sub>11</sub>)<sub>26</sub>.

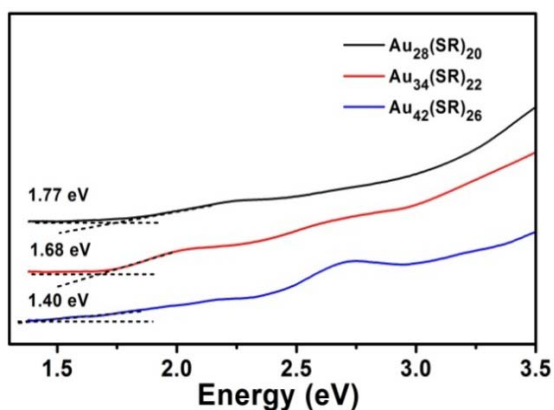

Figure S3. Photon-energy plot of Au<sub>28</sub>(S-c-C<sub>6</sub>H<sub>11</sub>)<sub>20</sub>, Au<sub>34</sub>(S-c-C<sub>6</sub>H<sub>11</sub>)<sub>22</sub> and Au<sub>42</sub>(S-c-C<sub>6</sub>H<sub>11</sub>)<sub>26</sub>.

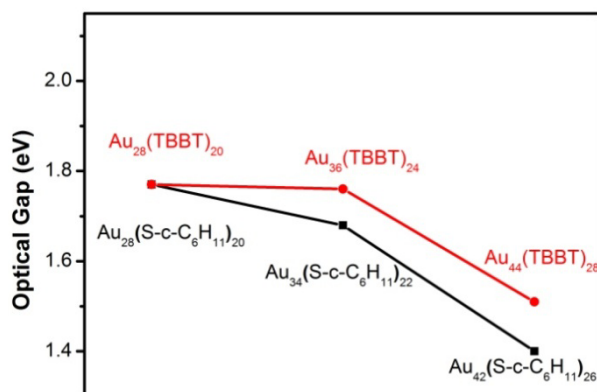

Figure S4. Optical gap comparison of the two series gold nanoclusters.

## Instrumentation

### UV-visible absorption spectroscopy

The UV/vis/NIR absorption spectra of the Au nanoclusters were acquired on a UV-2600 spectrophotometer (Shimadzu, Japan) in dichloromethane at room

temperature.

### **X-ray crystallography**

The single crystal X-ray diffraction data of both  $\text{Au}_{34}(\text{S-c-C}_6\text{H}_{11})_{22}$  and  $\text{Au}_{42}(\text{S-c-C}_6\text{H}_{11})_{26}$  were collected on a Bruker D8 Venture Prospector Ultra equipped with an Apex II charge-coupled device detector and an ImSmicrofocus  $\text{CuK}_\alpha$  x-ray source ( $\lambda = 1.54178 \text{ \AA}$ ) under cold  $\text{N}_2$  flow at 173 K.

### **Electrospray ionization mass spectrometry (ESI MS)**

Electrospray ionization (ESI) mass spectra were recorded on a Waters Q-TOF mass spectrometer using a Z-spray source. The sample was first dissolved in toluene ( $\sim 0.5 \text{ g/L}$ ), and then diluted (2/1 v/v) with an ethanol solution containing 50 mmol of CsOAc. The sample was directly infused into the chamber at  $5 \mu\text{L}/\text{min}$ . The source temperature was maintained at  $70 \text{ }^\circ\text{C}$ , the spray voltage was 2.20 kV and the cone voltage was adjusted to 60 V.

**Table S1.** Crystal data and structure refinement for Au<sub>34</sub>(S-c-C<sub>6</sub>H<sub>11</sub>)<sub>22</sub>

|                                   |                                             |          |
|-----------------------------------|---------------------------------------------|----------|
| Identification code               | 160512_zsl6_0ma                             |          |
| Empirical formula                 | C138 H254 Au34 Cl12 S22                     |          |
| Formula weight                    | 9740.98                                     |          |
| Temperature                       | 172.99 K                                    |          |
| Wavelength                        | 1.54178 Å                                   |          |
| Crystal system                    | Orthorhombic                                |          |
| Space group                       | Pbcn                                        |          |
| Unit cell dimensions              | a = 26.0266(7) Å                            | α = 90°. |
|                                   | b = 27.9405(8) Å                            | β = 90°. |
|                                   | c = 28.5247(8) Å                            | γ = 90°. |
| Volume                            | 20743.1(10) Å <sup>3</sup>                  |          |
| Z                                 | 4                                           |          |
| Density (calculated)              | 3.119 Mg/m <sup>3</sup>                     |          |
| Absorption coefficient            | 47.657 mm <sup>-1</sup>                     |          |
| F(000)                            | 17296                                       |          |
| Theta range for data collection   | 2.320 to 68.384°.                           |          |
| Index ranges                      | -30 ≤ h ≤ 31, -31 ≤ k ≤ 33, -34 ≤ l ≤ 34    |          |
| Reflections collected             | 188505                                      |          |
| Independent reflections           | 19001 [R(int) = 0.0870]                     |          |
| Completeness to theta = 67.679°   | 99.9 %                                      |          |
| Absorption correction             | Semi-empirical from equivalents             |          |
| Max. and min. transmission        | 0.1665 and 0.0382                           |          |
| Refinement method                 | Full-matrix least-squares on F <sup>2</sup> |          |
| Data / restraints / parameters    | 19001 / 414 / 930                           |          |
| Goodness-of-fit on F <sup>2</sup> | 1.040                                       |          |
| Final R indices [I > 2σ(I)]       | R1 = 0.0514, wR2 = 0.1336                   |          |
| R indices (all data)              | R1 = 0.0566, wR2 = 0.1379                   |          |
| Extinction coefficient            | n/a                                         |          |
| Largest diff. peak and hole       | 4.384 and -4.347 e.Å <sup>-3</sup>          |          |

**Table S2.** Crystal data and structure refinement for Au<sub>42</sub>(S-c-C<sub>6</sub>H<sub>11</sub>)<sub>26</sub>.

|                                   |                                                   |                 |
|-----------------------------------|---------------------------------------------------|-----------------|
| Identification code               | 160520                                            |                 |
| Empirical formula                 | C156 H286 Au42 S26                                |                 |
| Formula weight                    | 11267.98                                          |                 |
| Temperature                       | 172.99 K                                          |                 |
| Wavelength                        | 1.54178 Å                                         |                 |
| Crystal system                    | Triclinic                                         |                 |
| Space group                       | P-1                                               |                 |
| Unit cell dimensions              | a = 20.6257(11) Å                                 | α = 78.427(3)°. |
|                                   | b = 20.7452(11) Å                                 | β = 80.789(3)°. |
|                                   | c = 30.3877(16) Å                                 | γ = 62.667(2)°. |
| Volume                            | 11281.4(11) Å <sup>3</sup>                        |                 |
| Z                                 | 2                                                 |                 |
| Density (calculated)              | 3.317 Mg/m <sup>3</sup>                           |                 |
| Absorption coefficient            | 52.356 mm <sup>-1</sup>                           |                 |
| F(000)                            | 9912                                              |                 |
| Theta range for data collection   | 2.423 to 66.500°.                                 |                 |
| Index ranges                      | -24 ≤ h ≤ 24, -24 ≤ k ≤ 24, -36 ≤ l ≤ 36          |                 |
| Reflections collected             | 151316                                            |                 |
| Independent reflections           | 38006 [R(int) = 0.0913]                           |                 |
| Completeness to theta = 67.679°   | 93.1 %                                            |                 |
| Absorption correction             | Semi-empirical from equivalents                   |                 |
| Max. and min. transmission        | 0.0211 and 0.0001                                 |                 |
| Refinement method                 | Full-matrix-block least-squares on F <sup>2</sup> |                 |
| Data / restraints / parameters    | 38006 / 1244 / 2017                               |                 |
| Goodness-of-fit on F <sup>2</sup> | 1.514                                             |                 |
| Final R indices [I > 2σ(I)]       | R1 = 0.1663, wR2 = 0.3875                         |                 |
| R indices (all data)              | R1 = 0.1989, wR2 = 0.4088                         |                 |
| Extinction coefficient            | n/a                                               |                 |
| Largest diff. peak and hole       | 10.495 and -6.544 e.Å <sup>-3</sup>               |                 |

**Table S3.** Atomic coordinates ( $\times 10^4$ ) and equivalent isotropic displacement parameters ( $\text{\AA}^2 \times 10^3$ ) for  $\text{Au}_{34}(\text{SC}_6\text{H}_{11})_{22}$ .  $U(\text{eq})$  is defined as one third of the trace of the orthogonalized  $U_{ij}$  tensor.

|        | x       | y       | z       | U(eq) |
|--------|---------|---------|---------|-------|
| Au(1)  | 5796(1) | 7520(1) | 2949(1) | 19(1) |
| Au(2)  | 5000    | 8049(1) | 2500    | 18(1) |
| Au(3)  | 5000    | 6976(1) | 2500    | 16(1) |
| Au(4)  | 5954(1) | 6509(1) | 3044(1) | 21(1) |
| Au(5)  | 5955(1) | 6941(1) | 2098(1) | 21(1) |
| Au(6)  | 6009(1) | 8113(1) | 2232(1) | 22(1) |
| Au(7)  | 5643(1) | 8494(1) | 3075(1) | 24(1) |
| Au(8)  | 5000    | 9266(1) | 2500    | 31(1) |
| Au(9)  | 4553(1) | 8690(1) | 3427(1) | 26(1) |
| Au(10) | 4768(1) | 7490(1) | 3339(1) | 20(1) |
| Au(11) | 4876(1) | 6513(1) | 3342(1) | 20(1) |
| Au(12) | 5000    | 5874(1) | 2500    | 21(1) |
| Au(13) | 5788(1) | 6082(1) | 4035(1) | 27(1) |
| Au(14) | 5802(1) | 7087(1) | 3797(1) | 23(1) |
| Au(15) | 6695(1) | 7134(1) | 3263(1) | 25(1) |
| Au(16) | 7187(1) | 6503(1) | 2496(1) | 34(1) |
| Au(17) | 7144(1) | 7874(1) | 2572(1) | 27(1) |
| Au(18) | 7074(1) | 6201(1) | 3617(1) | 35(1) |
| Au(19) | 5943(1) | 8123(1) | 4096(1) | 27(1) |
| S(1)   | 4302(1) | 9337(1) | 2980(1) | 32(1) |
| S(2)   | 4663(1) | 8065(1) | 3941(1) | 25(1) |
| S(3)   | 5639(1) | 7478(1) | 4523(1) | 28(1) |
| S(4)   | 6201(1) | 8772(1) | 3656(1) | 29(1) |
| S(5)   | 4966(1) | 5849(1) | 3851(1) | 31(1) |
| S(6)   | 6601(1) | 6276(1) | 4290(1) | 31(1) |
| S(7)   | 5876(1) | 5791(1) | 2602(1) | 23(1) |

|       |          |          |          |       |
|-------|----------|----------|----------|-------|
| S(8)  | 7645(2)  | 6056(2)  | 3022(1)  | 46(1) |
| S(9)  | 6821(1)  | 6919(1)  | 1887(1)  | 30(1) |
| S(10) | 6830(1)  | 8178(1)  | 1875(1)  | 26(1) |
| S(11) | 7485(1)  | 7543(1)  | 3244(1)  | 27(1) |
| C(1)  | 4408(6)  | 9875(5)  | 3350(5)  | 37(3) |
| C(2)  | 4370(7)  | 10328(6) | 3017(6)  | 49(4) |
| C(3)  | 4415(8)  | 10768(7) | 3318(7)  | 62(5) |
| C(4)  | 4006(8)  | 10787(7) | 3696(7)  | 63(5) |
| C(5)  | 4026(9)  | 10359(8) | 4008(8)  | 70(5) |
| C(6)  | 3996(7)  | 9899(6)  | 3717(6)  | 49(4) |
| C(7)  | 4003(6)  | 7998(5)  | 4170(5)  | 38(3) |
| C(8)  | 3902(9)  | 8375(8)  | 4543(8)  | 75(6) |
| C(9)  | 3384(10) | 8337(10) | 4743(10) | 88(7) |
| C(10) | 3223(9)  | 7882(8)  | 4903(8)  | 71(5) |
| C(11) | 3340(10) | 7510(9)  | 4558(9)  | 86(7) |
| C(12) | 3889(11) | 7541(9)  | 4361(10) | 89(7) |
| C(13) | 6147(5)  | 7302(5)  | 4942(5)  | 33(3) |
| C(14) | 6275(6)  | 7713(5)  | 5270(5)  | 41(3) |
| C(15) | 6702(9)  | 7546(8)  | 5606(8)  | 75(6) |
| C(16) | 6537(8)  | 7113(7)  | 5882(7)  | 62(5) |
| C(17) | 6400(8)  | 6707(7)  | 5562(7)  | 60(4) |
| C(18) | 5975(6)  | 6859(5)  | 5207(5)  | 40(3) |
| C(19) | 5939(6)  | 9303(5)  | 3940(5)  | 39(3) |
| C(20) | 5969(7)  | 9734(6)  | 3591(6)  | 54(4) |
| C(21) | 5800(8)  | 10180(8) | 3840(8)  | 68(5) |
| C(22) | 6156(8)  | 10292(7) | 4265(7)  | 61(4) |
| C(23) | 6119(7)  | 9880(6)  | 4608(6)  | 54(4) |
| C(24) | 6277(6)  | 9409(5)  | 4374(5)  | 38(3) |
| C(25) | 4600(6)  | 5938(6)  | 4399(5)  | 45(3) |
| C(26) | 4600(9)  | 6431(8)  | 4568(7)  | 69(5) |



|       |          |          |          |        |
|-------|----------|----------|----------|--------|
| C(27) | 4266(12) | 6456(11) | 5011(11) | 105(9) |
| C(28) | 4460(9)  | 6114(8)  | 5391(8)  | 74(6)  |
| C(29) | 4485(10) | 5649(9)  | 5215(8)  | 81(6)  |
| C(30) | 4806(8)  | 5604(7)  | 4785(7)  | 63(5)  |
| C(31) | 6810(5)  | 5768(5)  | 4660(5)  | 35(3)  |
| C(32) | 6701(6)  | 5283(5)  | 4447(5)  | 39(3)  |
| C(33) | 6921(7)  | 4886(6)  | 4746(6)  | 52(4)  |
| C(34) | 7491(7)  | 4959(6)  | 4839(7)  | 54(4)  |
| C(35) | 7580(7)  | 5429(6)  | 5083(6)  | 52(4)  |
| C(36) | 7385(6)  | 5838(5)  | 4770(6)  | 44(3)  |
| C(37) | 5957(5)  | 5278(5)  | 3009(5)  | 33(3)  |
| C(38) | 5574(8)  | 4903(7)  | 2943(7)  | 61(5)  |
| C(39) | 5673(9)  | 4467(8)  | 3244(8)  | 70(5)  |
| C(40) | 6189(7)  | 4258(6)  | 3154(6)  | 52(4)  |
| C(41) | 6592(7)  | 4634(7)  | 3213(7)  | 55(4)  |
| C(42) | 6502(6)  | 5079(6)  | 2923(6)  | 50(4)  |
| C(43) | 8216(6)  | 6436(6)  | 3140(5)  | 45(3)  |
| C(44) | 8674(8)  | 6241(8)  | 2849(7)  | 68(5)  |
| C(45) | 9137(11) | 6512(10) | 2951(9)  | 89(7)  |
| C(46) | 9275(10) | 6577(10) | 3443(9)  | 84(7)  |
| C(47) | 8838(9)  | 6786(9)  | 3742(8)  | 76(6)  |
| C(48) | 8371(9)  | 6462(8)  | 3650(8)  | 69(5)  |
| C(49) | 6899(6)  | 6491(5)  | 1397(5)  | 36(3)  |
| C(50) | 6710(6)  | 5988(6)  | 1494(6)  | 47(4)  |
| C(51) | 6849(8)  | 5656(7)  | 1102(7)  | 63(5)  |
| C(52) | 7418(8)  | 5666(7)  | 1015(7)  | 64(5)  |
| C(53) | 7595(8)  | 6139(7)  | 872(7)   | 65(5)  |
| C(54) | 7480(6)  | 6500(6)  | 1278(6)  | 47(4)  |
| C(55) | 7002(5)  | 8818(5)  | 1864(4)  | 30(3)  |
| C(56) | 7484(6)  | 8880(5)  | 1569(5)  | 41(3)  |

|       |         |         |         |       |
|-------|---------|---------|---------|-------|
| C(57) | 7610(7) | 9410(7) | 1521(7) | 56(4) |
| C(58) | 7674(7) | 9637(6) | 2012(6) | 53(4) |
| C(59) | 7177(7) | 9590(6) | 2308(7) | 55(4) |
| C(60) | 7048(6) | 9049(5) | 2344(5) | 41(3) |
| C(61) | 7416(5) | 8022(4) | 3688(4) | 26(2) |
| C(62) | 7858(6) | 8365(6) | 3636(6) | 47(4) |
| C(63) | 7810(8) | 8756(7) | 4016(6) | 57(4) |
| C(64) | 7843(7) | 8516(7) | 4510(6) | 56(4) |
| C(65) | 7417(6) | 8177(6) | 4559(5) | 44(3) |
| C(66) | 7423(6) | 7781(5) | 4177(5) | 38(3) |

---

**Table S4.** Bond lengths [ $\text{\AA}$ ] and angles [ $^\circ$ ] for  $\text{Au}_{34}(\text{SC}_6\text{H}_{11})_{22}$ .

---

| Atom1-Atom2    | Length/ $\text{\AA}$ |
|----------------|----------------------|
| Au(1)-Au(2)    | 2.8492(5)            |
| Au(1)-Au(3)    | 2.8698(5)            |
| Au(1)-Au(4)    | 2.8675(6)            |
| Au(1)-Au(5)    | 2.9468(6)            |
| Au(1)-Au(6)    | 2.6921(6)            |
| Au(1)-Au(7)    | 2.7729(6)            |
| Au(1)-Au(10)   | 2.8961(6)            |
| Au(1)-Au(14)   | 2.7036(6)            |
| Au(1)-Au(15)   | 2.7270(6)            |
| Au(2)-Au(1)#1  | 2.8492(5)            |
| Au(2)-Au(3)    | 2.9986(9)            |
| Au(2)-Au(6)    | 2.7416(5)            |
| Au(2)-Au(6)#1  | 2.7416(5)            |
| Au(2)-Au(7)    | 2.6519(5)            |
| Au(2)-Au(7)#1  | 2.6519(5)            |
| Au(2)-Au(10)   | 2.9214(6)            |
| Au(2)-Au(10)#1 | 2.9213(6)            |
| Au(3)-Au(1)#1  | 2.8699(5)            |
| Au(3)-Au(4)#1  | 3.2044(5)            |
| Au(3)-Au(4)    | 3.2043(5)            |
| Au(3)-Au(5)    | 2.7398(4)            |
| Au(3)-Au(5)#1  | 2.7398(4)            |
| Au(3)-Au(10)   | 2.8544(5)            |
| Au(3)-Au(10)#1 | 2.8543(5)            |
| Au(3)-Au(11)#1 | 2.7489(5)            |
| Au(3)-Au(11)   | 2.7489(5)            |
| Au(3)-Au(12)   | 3.0792(8)            |

|                |           |
|----------------|-----------|
| Au(4)-Au(5)    | 2.9565(7) |
| Au(4)-Au(11)   | 2.9319(7) |
| Au(4)-Au(13)   | 3.1005(7) |
| Au(4)-Au(14)   | 2.7169(6) |
| Au(4)-Au(15)   | 2.6769(6) |
| Au(4)-S(7)     | 2.377(3)  |
| Au(5)-Au(6)    | 3.2989(7) |
| Au(5)-Au(10)#1 | 2.7282(6) |
| Au(5)-Au(11)#1 | 2.7727(6) |
| Au(5)-S(9)     | 2.334(3)  |
| Au(6)-Au(7)    | 2.7964(7) |
| Au(6)-Au(9)#1  | 2.8758(7) |
| Au(6)-Au(10)#1 | 3.1273(7) |
| Au(6)-Au(17)   | 3.1811(7) |
| Au(6)-S(10)    | 2.372(3)  |
| Au(7)-Au(8)    | 3.1856(7) |
| Au(7)-Au(9)    | 3.0607(7) |
| Au(7)-Au(19)   | 3.1893(7) |
| Au(7)-S(4)     | 2.336(3)  |
| Au(8)-Au(7)#1  | 3.1856(7) |
| Au(8)-Au(9)    | 3.3070(6) |
| Au(8)-Au(9)#1  | 3.3071(6) |
| Au(8)-S(1)#1   | 2.283(3)  |
| Au(8)-S(1)     | 2.283(3)  |
| Au(9)-Au(6)#1  | 2.8759(7) |
| Au(9)-S(1)     | 2.307(3)  |
| Au(9)-S(2)     | 2.299(3)  |
| Au(10)-Au(5)#1 | 2.7282(6) |
| Au(10)-Au(6)#1 | 3.1273(7) |
| Au(10)-Au(11)  | 2.7437(6) |

|                 |           |
|-----------------|-----------|
| Au(10)-Au(14)   | 3.1947(7) |
| Au(10)-S(2)     | 2.367(3)  |
| Au(11)-Au(5)#1  | 2.7728(6) |
| Au(11)-Au(12)   | 3.0109(6) |
| Au(11)-Au(13)   | 3.3151(7) |
| Au(11)-Au(14)   | 3.1715(7) |
| Au(11)-S(5)     | 2.367(3)  |
| Au(12)-Au(11)#1 | 3.0109(6) |
| Au(12)-S(7)#1   | 2.310(3)  |
| Au(12)-S(7)     | 2.310(3)  |
| Au(13)-Au(14)   | 2.8898(7) |
| Au(13)-S(5)     | 2.296(3)  |
| Au(13)-S(6)     | 2.302(3)  |
| Au(14)-Au(15)   | 2.7822(7) |
| Au(14)-Au(19)   | 3.0413(7) |
| Au(14)-S(3)     | 2.381(3)  |
| Au(15)-Au(16)   | 3.0892(7) |
| Au(15)-Au(17)   | 3.0859(7) |
| Au(15)-Au(18)   | 2.9654(7) |
| Au(15)-S(11)    | 2.353(3)  |
| Au(16)-Au(18)   | 3.3207(8) |
| Au(16)-S(8)     | 2.288(4)  |
| Au(16)-S(9)     | 2.296(3)  |
| Au(17)-S(10)    | 2.312(3)  |
| Au(17)-S(11)    | 2.305(3)  |
| Au(18)-S(6)     | 2.292(3)  |
| Au(18)-S(8)     | 2.292(4)  |
| Au(19)-S(3)     | 2.315(3)  |
| Au(19)-S(4)     | 2.307(3)  |
| S(1)-C(1)       | 1.857(14) |

|             |           |
|-------------|-----------|
| S(2)-C(7)   | 1.848(15) |
| S(3)-C(13)  | 1.848(14) |
| S(4)-C(19)  | 1.823(15) |
| S(5)-C(25)  | 1.847(16) |
| S(6)-C(31)  | 1.849(14) |
| S(7)-C(37)  | 1.856(14) |
| S(8)-C(43)  | 1.859(17) |
| S(9)-C(49)  | 1.851(14) |
| S(10)-C(55) | 1.846(13) |
| S(11)-C(61) | 1.850(13) |
| C(1)-H(1)   | 1.0000    |
| C(1)-C(2)   | 1.59(2)   |
| C(1)-C(6)   | 1.50(2)   |
| C(2)-H(2A)  | 0.9900    |
| C(2)-H(2B)  | 0.9900    |
| C(2)-C(3)   | 1.50(2)   |
| C(3)-H(3A)  | 0.9900    |
| C(3)-H(3B)  | 0.9900    |
| C(3)-C(4)   | 1.52(3)   |
| C(4)-H(4A)  | 0.9900    |
| C(4)-H(4B)  | 0.9900    |
| C(4)-C(5)   | 1.49(3)   |
| C(5)-H(5A)  | 0.9900    |
| C(5)-H(5B)  | 0.9900    |
| C(5)-C(6)   | 1.53(3)   |
| C(6)-H(6A)  | 0.9900    |
| C(6)-H(6B)  | 0.9900    |
| C(7)-H(7)   | 1.0000    |
| C(7)-C(8)   | 1.52(3)   |
| C(7)-C(12)  | 1.42(3)   |

|              |           |
|--------------|-----------|
| C(8)-H(8A)   | 0.9900    |
| C(8)-H(8B)   | 0.9900    |
| C(8)-C(9)    | 1.47(3)   |
| C(9)-H(9A)   | 0.9900    |
| C(9)-H(9B)   | 0.9900    |
| C(9)-C(10)   | 1.41(3)   |
| C(10)-H(10A) | 0.9900    |
| C(10)-H(10B) | 0.9900    |
| C(10)-C(11)  | 1.47(3)   |
| C(11)-H(11A) | 0.9900    |
| C(11)-H(11B) | 0.9900    |
| C(11)-C(12)  | 1.54(3)   |
| C(12)-H(12A) | 0.9900    |
| C(12)-H(12B) | 0.9900    |
| C(13)-H(13)  | 1.0000    |
| C(13)-C(14)  | 1.517(19) |
| C(13)-C(18)  | 1.52(2)   |
| C(14)-H(14A) | 0.9900    |
| C(14)-H(14B) | 0.9900    |
| C(14)-C(15)  | 1.54(3)   |
| C(15)-H(15A) | 0.9900    |
| C(15)-H(15B) | 0.9900    |
| C(15)-C(16)  | 1.50(3)   |
| C(16)-H(16A) | 0.9900    |
| C(16)-H(16B) | 0.9900    |
| C(16)-C(17)  | 1.50(3)   |
| C(17)-H(17A) | 0.9900    |
| C(17)-H(17B) | 0.9900    |
| C(17)-C(18)  | 1.56(2)   |
| C(18)-H(18A) | 0.9900    |

|              |         |
|--------------|---------|
| C(18)-H(18B) | 0.9900  |
| C(19)-H(19)  | 1.0000  |
| C(19)-C(20)  | 1.56(2) |
| C(19)-C(24)  | 1.55(2) |
| C(20)-H(20A) | 0.9900  |
| C(20)-H(20B) | 0.9900  |
| C(20)-C(21)  | 1.50(3) |
| C(21)-H(21A) | 0.9900  |
| C(21)-H(21B) | 0.9900  |
| C(21)-C(22)  | 1.56(3) |
| C(22)-H(22A) | 0.9900  |
| C(22)-H(22B) | 0.9900  |
| C(22)-C(23)  | 1.51(3) |
| C(23)-H(23A) | 0.9900  |
| C(23)-H(23B) | 0.9900  |
| C(23)-C(24)  | 1.53(2) |
| C(24)-H(24A) | 0.9900  |
| C(24)-H(24B) | 0.9900  |
| C(25)-H(25)  | 1.0000  |
| C(25)-C(26)  | 1.46(3) |
| C(25)-C(30)  | 1.54(2) |
| C(26)-H(26A) | 0.9900  |
| C(26)-H(26B) | 0.9900  |
| C(26)-C(27)  | 1.53(3) |
| C(27)-H(27A) | 0.9900  |
| C(27)-H(27B) | 0.9900  |
| C(27)-C(28)  | 1.53(4) |
| C(28)-H(28A) | 0.9900  |
| C(28)-H(28B) | 0.9900  |
| C(28)-C(29)  | 1.40(3) |



|              |           |
|--------------|-----------|
| C(29)-H(29A) | 0.9900    |
| C(29)-H(29B) | 0.9900    |
| C(29)-C(30)  | 1.49(3)   |
| C(30)-H(30A) | 0.9900    |
| C(30)-H(30B) | 0.9900    |
| C(31)-H(31)  | 1.0000    |
| C(31)-C(32)  | 1.513(19) |
| C(31)-C(36)  | 1.54(2)   |
| C(32)-H(32A) | 0.9900    |
| C(32)-H(32B) | 0.9900    |
| C(32)-C(33)  | 1.51(2)   |
| C(33)-H(33A) | 0.9900    |
| C(33)-H(33B) | 0.9900    |
| C(33)-C(34)  | 1.52(2)   |
| C(34)-H(34A) | 0.9900    |
| C(34)-H(34B) | 0.9900    |
| C(34)-C(35)  | 1.50(2)   |
| C(35)-H(35A) | 0.9900    |
| C(35)-H(35B) | 0.9900    |
| C(35)-C(36)  | 1.54(2)   |
| C(36)-H(36A) | 0.9900    |
| C(36)-H(36B) | 0.9900    |
| C(37)-H(37)  | 1.0000    |
| C(37)-C(38)  | 1.46(2)   |
| C(37)-C(42)  | 1.54(2)   |
| C(38)-H(38A) | 0.9900    |
| C(38)-H(38B) | 0.9900    |
| C(38)-C(39)  | 1.51(3)   |
| C(39)-H(39A) | 0.9900    |
| C(39)-H(39B) | 0.9900    |

|              |         |
|--------------|---------|
| C(39)-C(40)  | 1.49(3) |
| C(40)-H(40A) | 0.9900  |
| C(40)-H(40B) | 0.9900  |
| C(40)-C(41)  | 1.49(2) |
| C(41)-H(41A) | 0.9900  |
| C(41)-H(41B) | 0.9900  |
| C(41)-C(42)  | 1.51(2) |
| C(42)-H(42A) | 0.9900  |
| C(42)-H(42B) | 0.9900  |
| C(43)-H(43)  | 1.0000  |
| C(43)-C(44)  | 1.55(3) |
| C(43)-C(48)  | 1.51(3) |
| C(44)-H(44A) | 0.9900  |
| C(44)-H(44B) | 0.9900  |
| C(44)-C(45)  | 1.45(3) |
| C(45)-H(45A) | 0.9900  |
| C(45)-H(45B) | 0.9900  |
| C(45)-C(46)  | 1.46(3) |
| C(46)-H(46A) | 0.9900  |
| C(46)-H(46B) | 0.9900  |
| C(46)-C(47)  | 1.54(3) |
| C(47)-H(47A) | 0.9900  |
| C(47)-H(47B) | 0.9900  |
| C(47)-C(48)  | 1.54(3) |
| C(48)-H(48A) | 0.9900  |
| C(48)-H(48B) | 0.9900  |
| C(49)-H(49)  | 1.0000  |
| C(49)-C(50)  | 1.51(2) |
| C(49)-C(54)  | 1.55(2) |
| C(50)-H(50A) | 0.9900  |

|              |           |
|--------------|-----------|
| C(50)-H(50B) | 0.9900    |
| C(50)-C(51)  | 1.50(2)   |
| C(51)-H(51A) | 0.9900    |
| C(51)-H(51B) | 0.9900    |
| C(51)-C(52)  | 1.50(3)   |
| C(52)-H(52A) | 0.9900    |
| C(52)-H(52B) | 0.9900    |
| C(52)-C(53)  | 1.46(3)   |
| C(53)-H(53A) | 0.9900    |
| C(53)-H(53B) | 0.9900    |
| C(53)-C(54)  | 1.57(3)   |
| C(54)-H(54A) | 0.9900    |
| C(54)-H(54B) | 0.9900    |
| C(55)-H(55)  | 1.0000    |
| C(55)-C(56)  | 1.518(19) |
| C(55)-C(60)  | 1.519(19) |
| C(56)-H(56A) | 0.9900    |
| C(56)-H(56B) | 0.9900    |
| C(56)-C(57)  | 1.52(2)   |
| C(57)-H(57A) | 0.9900    |
| C(57)-H(57B) | 0.9900    |
| C(57)-C(58)  | 1.55(2)   |
| C(58)-H(58A) | 0.9900    |
| C(58)-H(58B) | 0.9900    |
| C(58)-C(59)  | 1.55(3)   |
| C(59)-H(59A) | 0.9900    |
| C(59)-H(59B) | 0.9900    |
| C(59)-C(60)  | 1.55(2)   |
| C(60)-H(60A) | 0.9900    |
| C(60)-H(60B) | 0.9900    |

|                         |            |
|-------------------------|------------|
| C(61)-H(61)             | 1.0000     |
| C(61)-C(62)             | 1.505(19)  |
| C(61)-C(66)             | 1.550(18)  |
| C(62)-H(62A)            | 0.9900     |
| C(62)-H(62B)            | 0.9900     |
| C(62)-C(63)             | 1.54(2)    |
| C(63)-H(63A)            | 0.9900     |
| C(63)-H(63B)            | 0.9900     |
| C(63)-C(64)             | 1.56(3)    |
| C(64)-H(64A)            | 0.9900     |
| C(64)-H(64B)            | 0.9900     |
| C(64)-C(65)             | 1.46(2)    |
| C(65)-H(65A)            | 0.9900     |
| C(65)-H(65B)            | 0.9900     |
| C(65)-C(66)             | 1.55(2)    |
| C(66)-H(66A)            | 0.9900     |
| C(66)-H(66B)            | 0.9900     |
| atom(1)-atom(2)-atom(3) | angle/ °   |
| Au(2)-Au(1)-Au(3)       | 63.245(17) |
| Au(2)-Au(1)-Au(4)       | 131.15(2)  |
| Au(2)-Au(1)-Au(5)       | 90.946(16) |
| Au(2)-Au(1)-Au(10)      | 61.120(13) |
| Au(3)-Au(1)-Au(5)       | 56.183(12) |
| Au(3)-Au(1)-Au(10)      | 59.343(13) |
| Au(4)-Au(1)-Au(3)       | 67.905(16) |
| Au(4)-Au(1)-Au(5)       | 61.108(16) |
| Au(4)-Au(1)-Au(10)      | 93.885(18) |
| Au(6)-Au(1)-Au(2)       | 59.228(14) |
| Au(6)-Au(1)-Au(3)       | 97.789(18) |
| Au(6)-Au(1)-Au(4)       | 130.42(2)  |

|                        |             |
|------------------------|-------------|
| Au(6)-Au(1)-Au(5)      | 71.447(17)  |
| Au(6)-Au(1)-Au(7)      | 61.532(17)  |
| Au(6)-Au(1)-Au(10)     | 120.03(2)   |
| Au(6)-Au(1)-Au(14)     | 162.61(2)   |
| Au(6)-Au(1)-Au(15)     | 108.37(2)   |
| Au(7)-Au(1)-Au(2)      | 56.268(16)  |
| Au(7)-Au(1)-Au(3)      | 118.30(2)   |
| Au(7)-Au(1)-Au(4)      | 167.20(2)   |
| Au(7)-Au(1)-Au(5)      | 131.65(2)   |
| Au(7)-Au(1)-Au(10)     | 81.212(17)  |
| Au(10)-Au(1)-Au(5)     | 115.503(19) |
| Au(14)-Au(1)-Au(2)     | 129.72(2)   |
| Au(14)-Au(1)-Au(3)     | 99.597(18)  |
| Au(14)-Au(1)-Au(4)     | 58.287(16)  |
| Au(14)-Au(1)-Au(5)     | 119.39(2)   |
| Au(14)-Au(1)-Au(7)     | 108.94(2)   |
| Au(14)-Au(1)-Au(10)    | 69.475(17)  |
| Au(14)-Au(1)-Au(15)    | 61.634(17)  |
| Au(15)-Au(1)-Au(2)     | 167.47(2)   |
| Au(15)-Au(1)-Au(3)     | 123.80(2)   |
| Au(15)-Au(1)-Au(4)     | 57.107(15)  |
| Au(15)-Au(1)-Au(5)     | 86.129(18)  |
| Au(15)-Au(1)-Au(7)     | 117.90(2)   |
| Au(15)-Au(1)-Au(10)    | 130.90(2)   |
| Au(1)-Au(2)-Au(1)#1    | 117.43(3)   |
| Au(1)-Au(2)-Au(3)      | 58.713(13)  |
| Au(1)#1-Au(2)-Au(3)    | 58.714(13)  |
| Au(1)-Au(2)-Au(10)     | 60.232(15)  |
| Au(1)-Au(2)-Au(10)#1   | 86.588(17)  |
| Au(1)#1-Au(2)-Au(10)#1 | 60.232(15)  |

|                        |             |
|------------------------|-------------|
| Au(1)#1-Au(2)-Au(10)   | 86.588(17)  |
| Au(6)-Au(2)-Au(1)#1    | 127.184(18) |
| Au(6)#1-Au(2)-Au(1)    | 127.183(18) |
| Au(6)#1-Au(2)-Au(1)#1  | 57.527(13)  |
| Au(6)-Au(2)-Au(1)      | 57.530(13)  |
| Au(6)#1-Au(2)-Au(3)    | 93.725(16)  |
| Au(6)-Au(2)-Au(3)      | 93.727(16)  |
| Au(6)-Au(2)-Au(6)#1    | 172.55(3)   |
| Au(6)-Au(2)-Au(10)#1   | 66.954(14)  |
| Au(6)#1-Au(2)-Au(10)   | 66.953(14)  |
| Au(6)-Au(2)-Au(10)     | 117.457(16) |
| Au(6)#1-Au(2)-Au(10)#1 | 117.453(16) |
| Au(7)#1-Au(2)-Au(1)    | 168.514(15) |
| Au(7)#1-Au(2)-Au(1)#1  | 60.414(14)  |
| Au(7)-Au(2)-Au(1)      | 60.413(14)  |
| Au(7)-Au(2)-Au(1)#1    | 168.513(15) |
| Au(7)-Au(2)-Au(3)      | 117.914(15) |
| Au(7)#1-Au(2)-Au(3)    | 117.915(15) |
| Au(7)#1-Au(2)-Au(6)    | 113.698(18) |
| Au(7)-Au(2)-Au(6)#1    | 113.701(18) |
| Au(7)#1-Au(2)-Au(6)#1  | 62.432(15)  |
| Au(7)-Au(2)-Au(6)      | 62.433(15)  |
| Au(7)-Au(2)-Au(7)#1    | 124.17(3)   |
| Au(7)-Au(2)-Au(10)     | 82.791(14)  |
| Au(7)-Au(2)-Au(10)#1   | 128.807(14) |
| Au(7)#1-Au(2)-Au(10)#1 | 82.792(14)  |
| Au(7)#1-Au(2)-Au(10)   | 128.806(14) |
| Au(10)-Au(2)-Au(3)     | 57.635(13)  |
| Au(10)#1-Au(2)-Au(3)   | 57.634(13)  |
| Au(10)#1-Au(2)-Au(10)  | 115.27(3)   |

|                        |             |
|------------------------|-------------|
| Au(1)-Au(3)-Au(1)#1    | 116.08(3)   |
| Au(1)-Au(3)-Au(2)      | 58.041(13)  |
| Au(1)#1-Au(3)-Au(2)    | 58.041(13)  |
| Au(1)#1-Au(3)-Au(4)#1  | 56.012(11)  |
| Au(1)-Au(3)-Au(4)      | 56.013(11)  |
| Au(1)#1-Au(3)-Au(4)    | 172.09(2)   |
| Au(1)-Au(3)-Au(4)#1    | 172.09(2)   |
| Au(1)#1-Au(3)-Au(12)   | 121.959(13) |
| Au(1)-Au(3)-Au(12)     | 121.958(13) |
| Au(2)-Au(3)-Au(4)      | 114.054(12) |
| Au(2)-Au(3)-Au(4)#1    | 114.053(12) |
| Au(2)-Au(3)-Au(12)     | 180.0       |
| Au(4)-Au(3)-Au(4)#1    | 131.89(2)   |
| Au(5)-Au(3)-Au(1)#1    | 119.096(17) |
| Au(5)-Au(3)-Au(1)      | 63.330(14)  |
| Au(5)#1-Au(3)-Au(1)#1  | 63.328(14)  |
| Au(5)#1-Au(3)-Au(1)    | 119.094(17) |
| Au(5)-Au(3)-Au(2)      | 92.025(15)  |
| Au(5)#1-Au(3)-Au(2)    | 92.023(15)  |
| Au(5)-Au(3)-Au(4)      | 59.038(13)  |
| Au(5)#1-Au(3)-Au(4)#1  | 59.038(13)  |
| Au(5)-Au(3)-Au(4)#1    | 119.056(15) |
| Au(5)#1-Au(3)-Au(4)    | 119.057(15) |
| Au(5)-Au(3)-Au(5)#1    | 175.95(3)   |
| Au(5)-Au(3)-Au(10)     | 124.088(17) |
| Au(5)#1-Au(3)-Au(10)#1 | 124.086(17) |
| Au(5)-Au(3)-Au(10)#1   | 58.336(14)  |
| Au(5)#1-Au(3)-Au(10)   | 58.335(14)  |
| Au(5)#1-Au(3)-Au(11)   | 60.687(14)  |
| Au(5)-Au(3)-Au(11)#1   | 60.685(14)  |

|                         |             |
|-------------------------|-------------|
| Au(5)#1-Au(3)-Au(11)#1  | 117.151(17) |
| Au(5)-Au(3)-Au(11)      | 117.150(17) |
| Au(5)-Au(3)-Au(12)      | 87.975(15)  |
| Au(5)#1-Au(3)-Au(12)    | 87.977(15)  |
| Au(10)#1-Au(3)-Au(1)#1  | 60.786(15)  |
| Au(10)-Au(3)-Au(1)      | 60.786(15)  |
| Au(10)#1-Au(3)-Au(1)    | 87.475(17)  |
| Au(10)-Au(3)-Au(1)#1    | 87.474(17)  |
| Au(10)#1-Au(3)-Au(2)    | 59.823(13)  |
| Au(10)-Au(3)-Au(2)      | 59.823(13)  |
| Au(10)-Au(3)-Au(4)      | 87.869(12)  |
| Au(10)#1-Au(3)-Au(4)#1  | 87.868(13)  |
| Au(10)-Au(3)-Au(4)#1    | 116.548(13) |
| Au(10)#1-Au(3)-Au(4)    | 116.549(13) |
| Au(10)#1-Au(3)-Au(10)   | 119.65(3)   |
| Au(10)#1-Au(3)-Au(12)   | 120.177(13) |
| Au(10)-Au(3)-Au(12)     | 120.177(13) |
| Au(11)#1-Au(3)-Au(1)    | 123.695(13) |
| Au(11)-Au(3)-Au(1)#1    | 123.695(13) |
| Au(11)#1-Au(3)-Au(1)#1  | 86.776(13)  |
| Au(11)-Au(3)-Au(1)      | 86.777(13)  |
| Au(11)-Au(3)-Au(2)      | 118.096(14) |
| Au(11)#1-Au(3)-Au(2)    | 118.094(14) |
| Au(11)-Au(3)-Au(4)#1    | 98.043(17)  |
| Au(11)-Au(3)-Au(4)      | 58.411(14)  |
| Au(11)#1-Au(3)-Au(4)#1  | 58.411(14)  |
| Au(11)#1-Au(3)-Au(4)    | 98.043(17)  |
| Au(11)#1-Au(3)-Au(10)#1 | 58.598(13)  |
| Au(11)#1-Au(3)-Au(10)   | 173.977(15) |
| Au(11)-Au(3)-Au(10)     | 58.600(13)  |



|                       |             |
|-----------------------|-------------|
| Au(11)-Au(3)-Au(10)#1 | 173.978(16) |
| Au(11)#1-Au(3)-Au(11) | 123.81(3)   |
| Au(11)-Au(3)-Au(12)   | 61.904(14)  |
| Au(11)#1-Au(3)-Au(12) | 61.906(14)  |
| Au(12)-Au(3)-Au(4)    | 65.946(12)  |
| Au(12)-Au(3)-Au(4)#1  | 65.947(12)  |
| Au(1)-Au(4)-Au(3)     | 56.082(15)  |
| Au(1)-Au(4)-Au(5)     | 60.770(15)  |
| Au(1)-Au(4)-Au(11)    | 83.466(17)  |
| Au(1)-Au(4)-Au(13)    | 116.41(2)   |
| Au(5)-Au(4)-Au(3)     | 52.623(12)  |
| Au(5)-Au(4)-Au(13)    | 171.99(2)   |
| Au(11)-Au(4)-Au(3)    | 53.002(12)  |
| Au(11)-Au(4)-Au(5)    | 105.385(18) |
| Au(11)-Au(4)-Au(13)   | 66.605(16)  |
| Au(13)-Au(4)-Au(3)    | 119.378(17) |
| Au(14)-Au(4)-Au(1)    | 57.836(16)  |
| Au(14)-Au(4)-Au(3)    | 91.591(17)  |
| Au(14)-Au(4)-Au(5)    | 118.61(2)   |
| Au(14)-Au(4)-Au(11)   | 68.190(17)  |
| Au(14)-Au(4)-Au(13)   | 59.132(16)  |
| Au(15)-Au(4)-Au(1)    | 58.806(16)  |
| Au(15)-Au(4)-Au(3)    | 113.89(2)   |
| Au(15)-Au(4)-Au(5)    | 86.845(19)  |
| Au(15)-Au(4)-Au(11)   | 128.24(2)   |
| Au(15)-Au(4)-Au(13)   | 97.96(2)    |
| Au(15)-Au(4)-Au(14)   | 62.098(18)  |
| S(7)-Au(4)-Au(1)      | 140.31(7)   |
| S(7)-Au(4)-Au(3)      | 91.26(7)    |
| S(7)-Au(4)-Au(5)      | 82.06(7)    |

|                         |             |
|-------------------------|-------------|
| S(7)-Au(4)-Au(11)       | 94.38(7)    |
| S(7)-Au(4)-Au(13)       | 98.44(7)    |
| S(7)-Au(4)-Au(14)       | 155.27(7)   |
| S(7)-Au(4)-Au(15)       | 137.37(7)   |
| Au(1)-Au(5)-Au(4)       | 58.122(15)  |
| Au(1)-Au(5)-Au(6)       | 50.682(14)  |
| Au(3)-Au(5)-Au(1)       | 60.487(15)  |
| Au(3)-Au(5)-Au(4)       | 68.339(15)  |
| Au(3)-Au(5)-Au(6)       | 87.425(18)  |
| Au(3)-Au(5)-Au(11)#1    | 59.820(14)  |
| Au(4)-Au(5)-Au(6)       | 107.471(18) |
| Au(10)#1-Au(5)-Au(1)    | 88.339(18)  |
| Au(10)#1-Au(5)-Au(3)    | 62.932(15)  |
| Au(10)#1-Au(5)-Au(4)    | 130.17(2)   |
| Au(10)#1-Au(5)-Au(6)    | 61.655(15)  |
| Au(10)#1-Au(5)-Au(11)#1 | 59.827(16)  |
| Au(11)#1-Au(5)-Au(1)    | 120.01(2)   |
| Au(11)#1-Au(5)-Au(4)    | 103.617(19) |
| Au(11)#1-Au(5)-Au(6)    | 120.956(19) |
| S(9)-Au(5)-Au(1)        | 111.31(8)   |
| S(9)-Au(5)-Au(3)        | 170.14(9)   |
| S(9)-Au(5)-Au(4)        | 103.03(9)   |
| S(9)-Au(5)-Au(6)        | 90.89(8)    |
| S(9)-Au(5)-Au(10)#1     | 124.36(9)   |
| S(9)-Au(5)-Au(11)#1     | 128.68(8)   |
| Au(1)-Au(6)-Au(2)       | 63.242(16)  |
| Au(1)-Au(6)-Au(5)       | 57.872(15)  |
| Au(1)-Au(6)-Au(7)       | 60.658(17)  |
| Au(1)-Au(6)-Au(9)#1     | 137.48(2)   |
| Au(1)-Au(6)-Au(10)#1    | 85.347(17)  |

|                        |             |
|------------------------|-------------|
| Au(1)-Au(6)-Au(17)     | 80.241(18)  |
| Au(2)-Au(6)-Au(5)      | 85.815(19)  |
| Au(2)-Au(6)-Au(7)      | 57.210(15)  |
| Au(2)-Au(6)-Au(9)#1    | 74.430(17)  |
| Au(2)-Au(6)-Au(10)#1   | 59.270(15)  |
| Au(2)-Au(6)-Au(17)     | 142.28(2)   |
| Au(7)-Au(6)-Au(5)      | 117.545(19) |
| Au(7)-Au(6)-Au(9)#1    | 100.11(2)   |
| Au(7)-Au(6)-Au(10)#1   | 116.04(2)   |
| Au(7)-Au(6)-Au(17)     | 97.69(2)    |
| Au(9)#1-Au(6)-Au(5)    | 117.32(2)   |
| Au(9)#1-Au(6)-Au(10)#1 | 69.089(16)  |
| Au(9)#1-Au(6)-Au(17)   | 142.15(2)   |
| Au(10)#1-Au(6)-Au(5)   | 50.158(14)  |
| Au(10)#1-Au(6)-Au(17)  | 130.01(2)   |
| Au(17)-Au(6)-Au(5)     | 82.324(16)  |
| S(10)-Au(6)-Au(1)      | 123.99(8)   |
| S(10)-Au(6)-Au(2)      | 170.76(7)   |
| S(10)-Au(6)-Au(5)      | 93.67(8)    |
| S(10)-Au(6)-Au(7)      | 130.28(7)   |
| S(10)-Au(6)-Au(9)#1    | 97.75(7)    |
| S(10)-Au(6)-Au(10)#1   | 113.68(7)   |
| S(10)-Au(6)-Au(17)     | 46.44(7)    |
| Au(1)-Au(7)-Au(6)      | 57.810(16)  |
| Au(1)-Au(7)-Au(8)      | 132.33(2)   |
| Au(1)-Au(7)-Au(9)      | 110.54(2)   |
| Au(1)-Au(7)-Au(19)     | 76.372(17)  |
| Au(2)-Au(7)-Au(1)      | 63.319(17)  |
| Au(2)-Au(7)-Au(6)      | 60.356(14)  |
| Au(2)-Au(7)-Au(8)      | 70.556(19)  |

|                       |             |
|-----------------------|-------------|
| Au(2)-Au(7)-Au(9)     | 72.629(15)  |
| Au(2)-Au(7)-Au(19)    | 124.56(2)   |
| Au(6)-Au(7)-Au(8)     | 89.657(17)  |
| Au(6)-Au(7)-Au(9)     | 131.79(2)   |
| Au(6)-Au(7)-Au(19)    | 125.38(2)   |
| Au(8)-Au(7)-Au(19)    | 144.951(19) |
| Au(9)-Au(7)-Au(8)     | 63.898(14)  |
| Au(9)-Au(7)-Au(19)    | 89.139(18)  |
| S(4)-Au(7)-Au(1)      | 109.25(7)   |
| S(4)-Au(7)-Au(2)      | 170.64(8)   |
| S(4)-Au(7)-Au(6)      | 121.66(8)   |
| S(4)-Au(7)-Au(8)      | 117.77(7)   |
| S(4)-Au(7)-Au(9)      | 106.47(8)   |
| S(4)-Au(7)-Au(19)     | 46.23(8)    |
| Au(7)#1-Au(8)-Au(7)   | 94.72(3)    |
| Au(7)#1-Au(8)-Au(9)#1 | 56.214(15)  |
| Au(7)-Au(8)-Au(9)     | 56.214(15)  |
| Au(7)-Au(8)-Au(9)#1   | 84.084(18)  |
| Au(7)#1-Au(8)-Au(9)   | 84.084(18)  |
| Au(9)-Au(8)-Au(9)#1   | 121.78(3)   |
| S(1)#1-Au(8)-Au(7)    | 87.08(8)    |
| S(1)#1-Au(8)-Au(7)#1  | 99.72(8)    |
| S(1)-Au(8)-Au(7)      | 99.72(8)    |
| S(1)-Au(8)-Au(7)#1    | 87.08(8)    |
| S(1)-Au(8)-Au(9)      | 44.20(8)    |
| S(1)-Au(8)-Au(9)#1    | 143.28(8)   |
| S(1)#1-Au(8)-Au(9)    | 143.29(8)   |
| S(1)#1-Au(8)-Au(9)#1  | 44.20(8)    |
| S(1)#1-Au(8)-S(1)     | 170.02(16)  |
| Au(6)#1-Au(9)-Au(7)   | 99.004(19)  |

|                        |             |
|------------------------|-------------|
| Au(6)#1-Au(9)-Au(8)    | 85.944(18)  |
| Au(7)-Au(9)-Au(8)      | 59.888(14)  |
| S(1)-Au(9)-Au(6)#1     | 86.21(8)    |
| S(1)-Au(9)-Au(7)       | 102.80(8)   |
| S(1)-Au(9)-Au(8)       | 43.63(8)    |
| S(2)-Au(9)-Au(6)#1     | 93.09(7)    |
| S(2)-Au(9)-Au(7)       | 87.52(7)    |
| S(2)-Au(9)-Au(8)       | 146.67(7)   |
| S(2)-Au(9)-S(1)        | 169.65(11)  |
| Au(1)-Au(10)-Au(2)     | 58.648(13)  |
| Au(1)-Au(10)-Au(6)#1   | 112.423(19) |
| Au(1)-Au(10)-Au(14)    | 52.424(14)  |
| Au(2)-Au(10)-Au(6)#1   | 53.776(12)  |
| Au(2)-Au(10)-Au(14)    | 110.481(17) |
| Au(3)-Au(10)-Au(1)     | 59.871(13)  |
| Au(3)-Au(10)-Au(2)     | 62.542(17)  |
| Au(3)-Au(10)-Au(6)#1   | 88.875(16)  |
| Au(3)-Au(10)-Au(14)    | 89.305(15)  |
| Au(5)#1-Au(10)-Au(1)   | 118.58(2)   |
| Au(5)#1-Au(10)-Au(2)   | 93.961(18)  |
| Au(5)#1-Au(10)-Au(3)   | 58.732(14)  |
| Au(5)#1-Au(10)-Au(6)#1 | 68.184(17)  |
| Au(5)#1-Au(10)-Au(11)  | 60.893(16)  |
| Au(5)#1-Au(10)-Au(14)  | 124.744(19) |
| Au(6)#1-Au(10)-Au(14)  | 162.54(2)   |
| Au(11)-Au(10)-Au(1)    | 86.357(18)  |
| Au(11)-Au(10)-Au(2)    | 120.98(2)   |
| Au(11)-Au(10)-Au(3)    | 58.779(16)  |
| Au(11)-Au(10)-Au(6)#1  | 128.46(2)   |
| Au(11)-Au(10)-Au(14)   | 64.035(16)  |

|                       |             |
|-----------------------|-------------|
| S(2)-Au(10)-Au(1)     | 111.42(7)   |
| S(2)-Au(10)-Au(2)     | 104.74(7)   |
| S(2)-Au(10)-Au(3)     | 166.79(7)   |
| S(2)-Au(10)-Au(5)#1   | 129.22(7)   |
| S(2)-Au(10)-Au(6)#1   | 85.67(7)    |
| S(2)-Au(10)-Au(11)    | 133.17(7)   |
| S(2)-Au(10)-Au(14)    | 92.29(7)    |
| Au(3)-Au(11)-Au(4)    | 68.587(14)  |
| Au(3)-Au(11)-Au(5)#1  | 59.495(13)  |
| Au(3)-Au(11)-Au(12)   | 64.447(17)  |
| Au(3)-Au(11)-Au(13)   | 127.446(18) |
| Au(3)-Au(11)-Au(14)   | 91.700(16)  |
| Au(4)-Au(11)-Au(12)   | 70.286(13)  |
| Au(4)-Au(11)-Au(13)   | 59.134(15)  |
| Au(4)-Au(11)-Au(14)   | 52.686(14)  |
| Au(5)#1-Au(11)-Au(4)  | 128.03(2)   |
| Au(5)#1-Au(11)-Au(12) | 88.760(17)  |
| Au(5)#1-Au(11)-Au(13) | 170.18(2)   |
| Au(5)#1-Au(11)-Au(14) | 124.00(2)   |
| Au(10)-Au(11)-Au(3)   | 62.621(17)  |
| Au(10)-Au(11)-Au(4)   | 95.748(18)  |
| Au(10)-Au(11)-Au(5)#1 | 59.279(16)  |
| Au(10)-Au(11)-Au(12)  | 126.69(2)   |
| Au(10)-Au(11)-Au(13)  | 115.89(2)   |
| Au(10)-Au(11)-Au(14)  | 64.908(16)  |
| Au(12)-Au(11)-Au(13)  | 100.570(16) |
| Au(12)-Au(11)-Au(14)  | 122.968(18) |
| Au(14)-Au(11)-Au(13)  | 52.854(14)  |
| S(5)-Au(11)-Au(3)     | 153.29(8)   |
| S(5)-Au(11)-Au(4)     | 94.60(8)    |

|                        |            |
|------------------------|------------|
| S(5)-Au(11)-Au(5)#1    | 133.92(8)  |
| S(5)-Au(11)-Au(10)     | 142.40(8)  |
| S(5)-Au(11)-Au(12)     | 90.79(8)   |
| S(5)-Au(11)-Au(13)     | 43.83(8)   |
| S(5)-Au(11)-Au(14)     | 94.04(8)   |
| Au(11)-Au(12)-Au(3)    | 53.649(13) |
| Au(11)#1-Au(12)-Au(3)  | 53.648(13) |
| Au(11)-Au(12)-Au(11)#1 | 107.30(3)  |
| S(7)-Au(12)-Au(3)      | 95.79(7)   |
| S(7)#1-Au(12)-Au(3)    | 95.79(7)   |
| S(7)-Au(12)-Au(11)#1   | 93.11(7)   |
| S(7)#1-Au(12)-Au(11)   | 93.11(7)   |
| S(7)#1-Au(12)-Au(11)#1 | 93.74(7)   |
| S(7)-Au(12)-Au(11)     | 93.74(7)   |
| S(7)#1-Au(12)-S(7)     | 168.43(13) |
| Au(4)-Au(13)-Au(11)    | 54.261(14) |
| Au(14)-Au(13)-Au(4)    | 53.803(15) |
| Au(14)-Au(13)-Au(11)   | 61.022(15) |
| S(5)-Au(13)-Au(4)      | 91.71(8)   |
| S(5)-Au(13)-Au(11)     | 45.56(7)   |
| S(5)-Au(13)-Au(14)     | 103.49(8)  |
| S(5)-Au(13)-S(6)       | 174.27(11) |
| S(6)-Au(13)-Au(4)      | 93.99(8)   |
| S(6)-Au(13)-Au(11)     | 139.51(8)  |
| S(6)-Au(13)-Au(14)     | 80.42(7)   |
| Au(1)-Au(14)-Au(4)     | 63.877(17) |
| Au(1)-Au(14)-Au(10)    | 58.101(15) |
| Au(1)-Au(14)-Au(11)    | 81.743(17) |
| Au(1)-Au(14)-Au(13)    | 130.19(2)  |
| Au(1)-Au(14)-Au(15)    | 59.599(17) |

|                      |            |
|----------------------|------------|
| Au(1)-Au(14)-Au(19)  | 79.965(18) |
| Au(4)-Au(14)-Au(10)  | 90.487(18) |
| Au(4)-Au(14)-Au(11)  | 59.124(15) |
| Au(4)-Au(14)-Au(13)  | 67.065(17) |
| Au(4)-Au(14)-Au(15)  | 58.246(17) |
| Au(4)-Au(14)-Au(19)  | 140.40(2)  |
| Au(11)-Au(14)-Au(10) | 51.057(13) |
| Au(13)-Au(14)-Au(10) | 115.35(2)  |
| Au(13)-Au(14)-Au(11) | 66.124(16) |
| Au(13)-Au(14)-Au(19) | 149.39(2)  |
| Au(15)-Au(14)-Au(10) | 117.54(2)  |
| Au(15)-Au(14)-Au(11) | 115.79(2)  |
| Au(15)-Au(14)-Au(13) | 100.70(2)  |
| Au(15)-Au(14)-Au(19) | 90.429(19) |
| Au(19)-Au(14)-Au(10) | 83.169(17) |
| Au(19)-Au(14)-Au(11) | 133.47(2)  |
| S(3)-Au(14)-Au(1)    | 124.88(8)  |
| S(3)-Au(14)-Au(4)    | 170.79(8)  |
| S(3)-Au(14)-Au(10)   | 92.54(8)   |
| S(3)-Au(14)-Au(11)   | 116.90(8)  |
| S(3)-Au(14)-Au(13)   | 103.82(7)  |
| S(3)-Au(14)-Au(15)   | 127.12(8)  |
| S(3)-Au(14)-Au(19)   | 48.71(7)   |
| Au(1)-Au(15)-Au(14)  | 58.768(17) |
| Au(1)-Au(15)-Au(16)  | 110.47(2)  |
| Au(1)-Au(15)-Au(17)  | 81.471(18) |
| Au(1)-Au(15)-Au(18)  | 138.17(2)  |
| Au(4)-Au(15)-Au(1)   | 64.088(17) |
| Au(4)-Au(15)-Au(14)  | 59.656(17) |
| Au(4)-Au(15)-Au(16)  | 76.177(19) |



|                      |            |
|----------------------|------------|
| Au(4)-Au(15)-Au(17)  | 124.17(2)  |
| Au(4)-Au(15)-Au(18)  | 75.281(19) |
| Au(14)-Au(15)-Au(16) | 135.03(2)  |
| Au(14)-Au(15)-Au(17) | 134.30(2)  |
| Au(14)-Au(15)-Au(18) | 92.87(2)   |
| Au(17)-Au(15)-Au(16) | 76.863(19) |
| Au(18)-Au(15)-Au(16) | 66.487(19) |
| Au(18)-Au(15)-Au(17) | 132.82(2)  |
| S(11)-Au(15)-Au(1)   | 123.41(7)  |
| S(11)-Au(15)-Au(4)   | 160.33(8)  |
| S(11)-Au(15)-Au(14)  | 139.93(8)  |
| S(11)-Au(15)-Au(16)  | 84.20(8)   |
| S(11)-Au(15)-Au(17)  | 47.85(8)   |
| S(11)-Au(15)-Au(18)  | 98.24(7)   |
| Au(15)-Au(16)-Au(18) | 54.970(16) |
| S(8)-Au(16)-Au(15)   | 93.64(10)  |
| S(8)-Au(16)-Au(18)   | 43.57(10)  |
| S(8)-Au(16)-S(9)     | 171.35(12) |
| S(9)-Au(16)-Au(15)   | 94.25(8)   |
| S(9)-Au(16)-Au(18)   | 145.08(7)  |
| Au(15)-Au(17)-Au(6)  | 89.036(17) |
| S(10)-Au(17)-Au(6)   | 48.03(7)   |
| S(10)-Au(17)-Au(15)  | 131.33(7)  |
| S(11)-Au(17)-Au(6)   | 134.01(8)  |
| S(11)-Au(17)-Au(15)  | 49.18(7)   |
| S(11)-Au(17)-S(10)   | 176.96(11) |
| Au(15)-Au(18)-Au(16) | 58.543(17) |
| S(6)-Au(18)-Au(15)   | 91.49(8)   |
| S(6)-Au(18)-Au(16)   | 146.26(8)  |
| S(8)-Au(18)-Au(15)   | 96.88(10)  |

|                     |            |
|---------------------|------------|
| S(8)-Au(18)-Au(16)  | 43.48(10)  |
| S(8)-Au(18)-S(6)    | 170.22(13) |
| Au(14)-Au(19)-Au(7) | 91.316(18) |
| S(3)-Au(19)-Au(7)   | 130.55(8)  |
| S(3)-Au(19)-Au(14)  | 50.59(7)   |
| S(4)-Au(19)-Au(7)   | 46.99(7)   |
| S(4)-Au(19)-Au(14)  | 129.10(8)  |
| S(4)-Au(19)-S(3)    | 176.87(11) |
| Au(8)-S(1)-Au(9)    | 92.18(11)  |
| C(1)-S(1)-Au(8)     | 107.0(5)   |
| C(1)-S(1)-Au(9)     | 106.1(5)   |
| Au(9)-S(2)-Au(10)   | 93.92(10)  |
| C(7)-S(2)-Au(9)     | 100.7(5)   |
| C(7)-S(2)-Au(10)    | 107.2(5)   |
| Au(19)-S(3)-Au(14)  | 80.70(10)  |
| C(13)-S(3)-Au(14)   | 108.3(4)   |
| C(13)-S(3)-Au(19)   | 107.6(5)   |
| Au(19)-S(4)-Au(7)   | 86.78(10)  |
| C(19)-S(4)-Au(7)    | 110.8(5)   |
| C(19)-S(4)-Au(19)   | 106.8(5)   |
| Au(13)-S(5)-Au(11)  | 90.61(10)  |
| C(25)-S(5)-Au(11)   | 111.1(5)   |
| C(25)-S(5)-Au(13)   | 104.4(5)   |
| Au(18)-S(6)-Au(13)  | 102.02(13) |
| C(31)-S(6)-Au(13)   | 105.7(5)   |
| C(31)-S(6)-Au(18)   | 104.4(5)   |
| Au(12)-S(7)-Au(4)   | 93.74(10)  |
| C(37)-S(7)-Au(4)    | 108.1(4)   |
| C(37)-S(7)-Au(12)   | 105.6(4)   |
| Au(16)-S(8)-Au(18)  | 92.95(15)  |

|                     |            |
|---------------------|------------|
| C(43)-S(8)-Au(16)   | 102.9(5)   |
| C(43)-S(8)-Au(18)   | 106.4(5)   |
| Au(16)-S(9)-Au(5)   | 102.71(12) |
| C(49)-S(9)-Au(5)    | 108.5(5)   |
| C(49)-S(9)-Au(16)   | 101.4(5)   |
| Au(17)-S(10)-Au(6)  | 85.53(9)   |
| C(55)-S(10)-Au(6)   | 107.5(4)   |
| C(55)-S(10)-Au(17)  | 106.5(4)   |
| Au(17)-S(11)-Au(15) | 82.97(10)  |
| C(61)-S(11)-Au(15)  | 104.6(4)   |
| C(61)-S(11)-Au(17)  | 104.0(4)   |
| S(1)-C(1)-H(1)      | 110.2      |
| C(2)-C(1)-S(1)      | 107.2(10)  |
| C(2)-C(1)-H(1)      | 110.2      |
| C(6)-C(1)-S(1)      | 109.2(11)  |
| C(6)-C(1)-H(1)      | 110.2      |
| C(6)-C(1)-C(2)      | 109.7(12)  |
| C(1)-C(2)-H(2A)     | 110.1      |
| C(1)-C(2)-H(2B)     | 110.1      |
| H(2A)-C(2)-H(2B)    | 108.5      |
| C(3)-C(2)-C(1)      | 107.8(14)  |
| C(3)-C(2)-H(2A)     | 110.1      |
| C(3)-C(2)-H(2B)     | 110.1      |
| C(2)-C(3)-H(3A)     | 109.1      |
| C(2)-C(3)-H(3B)     | 109.1      |
| C(2)-C(3)-C(4)      | 112.5(17)  |
| H(3A)-C(3)-H(3B)    | 107.8      |
| C(4)-C(3)-H(3A)     | 109.1      |
| C(4)-C(3)-H(3B)     | 109.1      |
| C(3)-C(4)-H(4A)     | 109.3      |

|                  |           |
|------------------|-----------|
| C(3)-C(4)-H(4B)  | 109.3     |
| H(4A)-C(4)-H(4B) | 107.9     |
| C(5)-C(4)-C(3)   | 111.8(17) |
| C(5)-C(4)-H(4A)  | 109.3     |
| C(5)-C(4)-H(4B)  | 109.3     |
| C(4)-C(5)-H(5A)  | 109.6     |
| C(4)-C(5)-H(5B)  | 109.6     |
| C(4)-C(5)-C(6)   | 110.4(17) |
| H(5A)-C(5)-H(5B) | 108.1     |
| C(6)-C(5)-H(5A)  | 109.6     |
| C(6)-C(5)-H(5B)  | 109.6     |
| C(1)-C(6)-C(5)   | 112.4(15) |
| C(1)-C(6)-H(6A)  | 109.1     |
| C(1)-C(6)-H(6B)  | 109.1     |
| C(5)-C(6)-H(6A)  | 109.1     |
| C(5)-C(6)-H(6B)  | 109.1     |
| H(6A)-C(6)-H(6B) | 107.9     |
| S(2)-C(7)-H(7)   | 107.7     |
| C(8)-C(7)-S(2)   | 109.9(12) |
| C(8)-C(7)-H(7)   | 107.7     |
| C(12)-C(7)-S(2)  | 114.9(14) |
| C(12)-C(7)-H(7)  | 107.7     |
| C(12)-C(7)-C(8)  | 108.6(17) |
| C(7)-C(8)-H(8A)  | 109.1     |
| C(7)-C(8)-H(8B)  | 109.1     |
| H(8A)-C(8)-H(8B) | 107.8     |
| C(9)-C(8)-C(7)   | 112(2)    |
| C(9)-C(8)-H(8A)  | 109.1     |
| C(9)-C(8)-H(8B)  | 109.1     |
| C(8)-C(9)-H(9A)  | 107.9     |

|                     |           |
|---------------------|-----------|
| C(8)-C(9)-H(9B)     | 107.9     |
| H(9A)-C(9)-H(9B)    | 107.2     |
| C(10)-C(9)-C(8)     | 118(2)    |
| C(10)-C(9)-H(9A)    | 107.9     |
| C(10)-C(9)-H(9B)    | 107.9     |
| C(9)-C(10)-H(10A)   | 109.4     |
| C(9)-C(10)-H(10B)   | 109.4     |
| C(9)-C(10)-C(11)    | 111(2)    |
| H(10A)-C(10)-H(10B) | 108.0     |
| C(11)-C(10)-H(10A)  | 109.4     |
| C(11)-C(10)-H(10B)  | 109.4     |
| C(10)-C(11)-H(11A)  | 108.9     |
| C(10)-C(11)-H(11B)  | 108.9     |
| C(10)-C(11)-C(12)   | 114(2)    |
| H(11A)-C(11)-H(11B) | 107.7     |
| C(12)-C(11)-H(11A)  | 108.9     |
| C(12)-C(11)-H(11B)  | 108.9     |
| C(7)-C(12)-C(11)    | 113(2)    |
| C(7)-C(12)-H(12A)   | 109.0     |
| C(7)-C(12)-H(12B)   | 109.0     |
| C(11)-C(12)-H(12A)  | 109.0     |
| C(11)-C(12)-H(12B)  | 109.0     |
| H(12A)-C(12)-H(12B) | 107.8     |
| S(3)-C(13)-H(13)    | 108.2     |
| C(14)-C(13)-S(3)    | 110.8(10) |
| C(14)-C(13)-H(13)   | 108.2     |
| C(14)-C(13)-C(18)   | 112.1(12) |
| C(18)-C(13)-S(3)    | 109.2(10) |
| C(18)-C(13)-H(13)   | 108.2     |
| C(13)-C(14)-H(14A)  | 110.1     |

|                     |           |
|---------------------|-----------|
| C(13)-C(14)-H(14B)  | 110.1     |
| C(13)-C(14)-C(15)   | 108.2(14) |
| H(14A)-C(14)-H(14B) | 108.4     |
| C(15)-C(14)-H(14A)  | 110.1     |
| C(15)-C(14)-H(14B)  | 110.1     |
| C(14)-C(15)-H(15A)  | 109.4     |
| C(14)-C(15)-H(15B)  | 109.4     |
| H(15A)-C(15)-H(15B) | 108.0     |
| C(16)-C(15)-C(14)   | 111.3(18) |
| C(16)-C(15)-H(15A)  | 109.4     |
| C(16)-C(15)-H(15B)  | 109.4     |
| C(15)-C(16)-H(16A)  | 109.5     |
| C(15)-C(16)-H(16B)  | 109.5     |
| C(15)-C(16)-C(17)   | 110.9(17) |
| H(16A)-C(16)-H(16B) | 108.0     |
| C(17)-C(16)-H(16A)  | 109.5     |
| C(17)-C(16)-H(16B)  | 109.5     |
| C(16)-C(17)-H(17A)  | 109.4     |
| C(16)-C(17)-H(17B)  | 109.4     |
| C(16)-C(17)-C(18)   | 111.0(16) |
| H(17A)-C(17)-H(17B) | 108.0     |
| C(18)-C(17)-H(17A)  | 109.4     |
| C(18)-C(17)-H(17B)  | 109.4     |
| C(13)-C(18)-C(17)   | 109.7(13) |
| C(13)-C(18)-H(18A)  | 109.7     |
| C(13)-C(18)-H(18B)  | 109.7     |
| C(17)-C(18)-H(18A)  | 109.7     |
| C(17)-C(18)-H(18B)  | 109.7     |
| H(18A)-C(18)-H(18B) | 108.2     |
| S(4)-C(19)-H(19)    | 110.3     |

|                     |           |
|---------------------|-----------|
| C(20)-C(19)-S(4)    | 108.9(11) |
| C(20)-C(19)-H(19)   | 110.3     |
| C(20)-C(19)-C(24)   | 109.6(12) |
| C(24)-C(19)-S(4)    | 107.5(10) |
| C(24)-C(19)-H(19)   | 110.3     |
| C(19)-C(20)-H(20A)  | 109.9     |
| C(19)-C(20)-H(20B)  | 109.9     |
| H(20A)-C(20)-H(20B) | 108.3     |
| C(21)-C(20)-C(19)   | 108.9(15) |
| C(21)-C(20)-H(20A)  | 109.9     |
| C(21)-C(20)-H(20B)  | 109.9     |
| C(20)-C(21)-H(21A)  | 109.4     |
| C(20)-C(21)-H(21B)  | 109.4     |
| C(20)-C(21)-C(22)   | 111.2(17) |
| H(21A)-C(21)-H(21B) | 108.0     |
| C(22)-C(21)-H(21A)  | 109.4     |
| C(22)-C(21)-H(21B)  | 109.4     |
| C(21)-C(22)-H(22A)  | 110.1     |
| C(21)-C(22)-H(22B)  | 110.1     |
| H(22A)-C(22)-H(22B) | 108.4     |
| C(23)-C(22)-C(21)   | 108.1(16) |
| C(23)-C(22)-H(22A)  | 110.1     |
| C(23)-C(22)-H(22B)  | 110.1     |
| C(22)-C(23)-H(23A)  | 109.5     |
| C(22)-C(23)-H(23B)  | 109.5     |
| H(23A)-C(23)-H(23B) | 108.1     |
| C(24)-C(23)-C(22)   | 110.8(14) |
| C(24)-C(23)-H(23A)  | 109.5     |
| C(24)-C(23)-H(23B)  | 109.5     |
| C(19)-C(24)-H(24A)  | 109.4     |

|                     |           |
|---------------------|-----------|
| C(19)-C(24)-H(24B)  | 109.4     |
| C(23)-C(24)-C(19)   | 111.1(13) |
| C(23)-C(24)-H(24A)  | 109.4     |
| C(23)-C(24)-H(24B)  | 109.4     |
| H(24A)-C(24)-H(24B) | 108.0     |
| S(5)-C(25)-H(25)    | 107.6     |
| C(26)-C(25)-S(5)    | 114.1(13) |
| C(26)-C(25)-H(25)   | 107.6     |
| C(26)-C(25)-C(30)   | 109.6(15) |
| C(30)-C(25)-S(5)    | 110.1(12) |
| C(30)-C(25)-H(25)   | 107.6     |
| C(25)-C(26)-H(26A)  | 110.0     |
| C(25)-C(26)-H(26B)  | 110.0     |
| C(25)-C(26)-C(27)   | 108(2)    |
| H(26A)-C(26)-H(26B) | 108.4     |
| C(27)-C(26)-H(26A)  | 110.0     |
| C(27)-C(26)-H(26B)  | 110.0     |
| C(26)-C(27)-H(27A)  | 109.3     |
| C(26)-C(27)-H(27B)  | 109.3     |
| H(27A)-C(27)-H(27B) | 108.0     |
| C(28)-C(27)-C(26)   | 112(2)    |
| C(28)-C(27)-H(27A)  | 109.3     |
| C(28)-C(27)-H(27B)  | 109.3     |
| C(27)-C(28)-H(28A)  | 109.7     |
| C(27)-C(28)-H(28B)  | 109.7     |
| H(28A)-C(28)-H(28B) | 108.2     |
| C(29)-C(28)-C(27)   | 110(2)    |
| C(29)-C(28)-H(28A)  | 109.7     |
| C(29)-C(28)-H(28B)  | 109.7     |
| C(28)-C(29)-H(29A)  | 108.8     |



|                     |           |
|---------------------|-----------|
| C(28)-C(29)-H(29B)  | 108.8     |
| C(28)-C(29)-C(30)   | 114(2)    |
| H(29A)-C(29)-H(29B) | 107.7     |
| C(30)-C(29)-H(29A)  | 108.8     |
| C(30)-C(29)-H(29B)  | 108.8     |
| C(25)-C(30)-H(30A)  | 109.6     |
| C(25)-C(30)-H(30B)  | 109.6     |
| C(29)-C(30)-C(25)   | 110.1(18) |
| C(29)-C(30)-H(30A)  | 109.6     |
| C(29)-C(30)-H(30B)  | 109.6     |
| H(30A)-C(30)-H(30B) | 108.2     |
| S(6)-C(31)-H(31)    | 107.6     |
| C(32)-C(31)-S(6)    | 113.8(10) |
| C(32)-C(31)-H(31)   | 107.6     |
| C(32)-C(31)-C(36)   | 112.2(12) |
| C(36)-C(31)-S(6)    | 107.8(10) |
| C(36)-C(31)-H(31)   | 107.6     |
| C(31)-C(32)-H(32A)  | 109.4     |
| C(31)-C(32)-H(32B)  | 109.4     |
| H(32A)-C(32)-H(32B) | 108.0     |
| C(33)-C(32)-C(31)   | 111.0(13) |
| C(33)-C(32)-H(32A)  | 109.4     |
| C(33)-C(32)-H(32B)  | 109.4     |
| C(32)-C(33)-H(33A)  | 109.3     |
| C(32)-C(33)-H(33B)  | 109.3     |
| C(32)-C(33)-C(34)   | 111.8(14) |
| H(33A)-C(33)-H(33B) | 107.9     |
| C(34)-C(33)-H(33A)  | 109.3     |
| C(34)-C(33)-H(33B)  | 109.3     |
| C(33)-C(34)-H(34A)  | 109.6     |

|                     |           |
|---------------------|-----------|
| C(33)-C(34)-H(34B)  | 109.6     |
| H(34A)-C(34)-H(34B) | 108.1     |
| C(35)-C(34)-C(33)   | 110.3(15) |
| C(35)-C(34)-H(34A)  | 109.6     |
| C(35)-C(34)-H(34B)  | 109.6     |
| C(34)-C(35)-H(35A)  | 109.8     |
| C(34)-C(35)-H(35B)  | 109.8     |
| C(34)-C(35)-C(36)   | 109.3(14) |
| H(35A)-C(35)-H(35B) | 108.3     |
| C(36)-C(35)-H(35A)  | 109.8     |
| C(36)-C(35)-H(35B)  | 109.8     |
| C(31)-C(36)-H(36A)  | 109.6     |
| C(31)-C(36)-H(36B)  | 109.6     |
| C(35)-C(36)-C(31)   | 110.2(13) |
| C(35)-C(36)-H(36A)  | 109.6     |
| C(35)-C(36)-H(36B)  | 109.6     |
| H(36A)-C(36)-H(36B) | 108.1     |
| S(7)-C(37)-H(37)    | 108.8     |
| C(38)-C(37)-S(7)    | 113.4(11) |
| C(38)-C(37)-H(37)   | 108.8     |
| C(38)-C(37)-C(42)   | 110.5(13) |
| C(42)-C(37)-S(7)    | 106.4(10) |
| C(42)-C(37)-H(37)   | 108.8     |
| C(37)-C(38)-H(38A)  | 109.0     |
| C(37)-C(38)-H(38B)  | 109.0     |
| C(37)-C(38)-C(39)   | 112.9(17) |
| H(38A)-C(38)-H(38B) | 107.8     |
| C(39)-C(38)-H(38A)  | 109.0     |
| C(39)-C(38)-H(38B)  | 109.0     |
| C(38)-C(39)-H(39A)  | 109.2     |

|                     |           |
|---------------------|-----------|
| C(38)-C(39)-H(39B)  | 109.2     |
| H(39A)-C(39)-H(39B) | 107.9     |
| C(40)-C(39)-C(38)   | 112.0(18) |
| C(40)-C(39)-H(39A)  | 109.2     |
| C(40)-C(39)-H(39B)  | 109.2     |
| C(39)-C(40)-H(40A)  | 109.7     |
| C(39)-C(40)-H(40B)  | 109.7     |
| C(39)-C(40)-C(41)   | 109.7(16) |
| H(40A)-C(40)-H(40B) | 108.2     |
| C(41)-C(40)-H(40A)  | 109.7     |
| C(41)-C(40)-H(40B)  | 109.7     |
| C(40)-C(41)-H(41A)  | 108.7     |
| C(40)-C(41)-H(41B)  | 108.7     |
| C(40)-C(41)-C(42)   | 114.1(15) |
| H(41A)-C(41)-H(41B) | 107.6     |
| C(42)-C(41)-H(41A)  | 108.7     |
| C(42)-C(41)-H(41B)  | 108.7     |
| C(37)-C(42)-H(42A)  | 109.5     |
| C(37)-C(42)-H(42B)  | 109.5     |
| C(41)-C(42)-C(37)   | 110.6(14) |
| C(41)-C(42)-H(42A)  | 109.5     |
| C(41)-C(42)-H(42B)  | 109.5     |
| H(42A)-C(42)-H(42B) | 108.1     |
| S(8)-C(43)-H(43)    | 108.2     |
| C(44)-C(43)-S(8)    | 108.3(12) |
| C(44)-C(43)-H(43)   | 108.2     |
| C(48)-C(43)-S(8)    | 114.5(13) |
| C(48)-C(43)-H(43)   | 108.2     |
| C(48)-C(43)-C(44)   | 109.1(16) |
| C(43)-C(44)-H(44A)  | 109.6     |

|                     |           |
|---------------------|-----------|
| C(43)-C(44)-H(44B)  | 109.6     |
| H(44A)-C(44)-H(44B) | 108.1     |
| C(45)-C(44)-C(43)   | 110.2(19) |
| C(45)-C(44)-H(44A)  | 109.6     |
| C(45)-C(44)-H(44B)  | 109.6     |
| C(44)-C(45)-H(45A)  | 107.9     |
| C(44)-C(45)-H(45B)  | 107.9     |
| C(44)-C(45)-C(46)   | 118(2)    |
| H(45A)-C(45)-H(45B) | 107.2     |
| C(46)-C(45)-H(45A)  | 107.9     |
| C(46)-C(45)-H(45B)  | 107.9     |
| C(45)-C(46)-H(46A)  | 108.9     |
| C(45)-C(46)-H(46B)  | 108.9     |
| C(45)-C(46)-C(47)   | 113(2)    |
| H(46A)-C(46)-H(46B) | 107.7     |
| C(47)-C(46)-H(46A)  | 108.9     |
| C(47)-C(46)-H(46B)  | 108.9     |
| C(46)-C(47)-H(47A)  | 110.7     |
| C(46)-C(47)-H(47B)  | 110.7     |
| C(46)-C(47)-C(48)   | 105(2)    |
| H(47A)-C(47)-H(47B) | 108.8     |
| C(48)-C(47)-H(47A)  | 110.7     |
| C(48)-C(47)-H(47B)  | 110.7     |
| C(43)-C(48)-C(47)   | 113.8(18) |
| C(43)-C(48)-H(48A)  | 108.8     |
| C(43)-C(48)-H(48B)  | 108.8     |
| C(47)-C(48)-H(48A)  | 108.8     |
| C(47)-C(48)-H(48B)  | 108.8     |
| H(48A)-C(48)-H(48B) | 107.7     |
| S(9)-C(49)-H(49)    | 108.2     |

|                     |           |
|---------------------|-----------|
| C(50)-C(49)-S(9)    | 115.2(10) |
| C(50)-C(49)-H(49)   | 108.2     |
| C(50)-C(49)-C(54)   | 111.9(12) |
| C(54)-C(49)-S(9)    | 105.1(10) |
| C(54)-C(49)-H(49)   | 108.2     |
| C(49)-C(50)-H(50A)  | 109.4     |
| C(49)-C(50)-H(50B)  | 109.4     |
| H(50A)-C(50)-H(50B) | 108.0     |
| C(51)-C(50)-C(49)   | 111.1(14) |
| C(51)-C(50)-H(50A)  | 109.4     |
| C(51)-C(50)-H(50B)  | 109.4     |
| C(50)-C(51)-H(51A)  | 109.5     |
| C(50)-C(51)-H(51B)  | 109.5     |
| C(50)-C(51)-C(52)   | 110.5(16) |
| H(51A)-C(51)-H(51B) | 108.1     |
| C(52)-C(51)-H(51A)  | 109.5     |
| C(52)-C(51)-H(51B)  | 109.5     |
| C(51)-C(52)-H(52A)  | 109.2     |
| C(51)-C(52)-H(52B)  | 109.2     |
| H(52A)-C(52)-H(52B) | 107.9     |
| C(53)-C(52)-C(51)   | 112.0(18) |
| C(53)-C(52)-H(52A)  | 109.2     |
| C(53)-C(52)-H(52B)  | 109.2     |
| C(52)-C(53)-H(53A)  | 110.0     |
| C(52)-C(53)-H(53B)  | 110.0     |
| C(52)-C(53)-C(54)   | 108.5(16) |
| H(53A)-C(53)-H(53B) | 108.4     |
| C(54)-C(53)-H(53A)  | 110.0     |
| C(54)-C(53)-H(53B)  | 110.0     |
| C(49)-C(54)-C(53)   | 109.7(14) |

|                     |           |
|---------------------|-----------|
| C(49)-C(54)-H(54A)  | 109.7     |
| C(49)-C(54)-H(54B)  | 109.7     |
| C(53)-C(54)-H(54A)  | 109.7     |
| C(53)-C(54)-H(54B)  | 109.7     |
| H(54A)-C(54)-H(54B) | 108.2     |
| S(10)-C(55)-H(55)   | 106.8     |
| C(56)-C(55)-S(10)   | 108.7(9)  |
| C(56)-C(55)-H(55)   | 106.8     |
| C(60)-C(55)-S(10)   | 114.5(9)  |
| C(60)-C(55)-H(55)   | 106.8     |
| C(60)-C(55)-C(56)   | 112.8(12) |
| C(55)-C(56)-H(56A)  | 109.7     |
| C(55)-C(56)-H(56B)  | 109.7     |
| C(55)-C(56)-C(57)   | 109.8(13) |
| H(56A)-C(56)-H(56B) | 108.2     |
| C(57)-C(56)-H(56A)  | 109.7     |
| C(57)-C(56)-H(56B)  | 109.7     |
| C(56)-C(57)-H(57A)  | 109.7     |
| C(56)-C(57)-H(57B)  | 109.7     |
| C(56)-C(57)-C(58)   | 109.8(15) |
| H(57A)-C(57)-H(57B) | 108.2     |
| C(58)-C(57)-H(57A)  | 109.7     |
| C(58)-C(57)-H(57B)  | 109.7     |
| C(57)-C(58)-H(58A)  | 109.3     |
| C(57)-C(58)-H(58B)  | 109.3     |
| C(57)-C(58)-C(59)   | 111.7(15) |
| H(58A)-C(58)-H(58B) | 107.9     |
| C(59)-C(58)-H(58A)  | 109.3     |
| C(59)-C(58)-H(58B)  | 109.3     |
| C(58)-C(59)-H(59A)  | 110.2     |

|                     |           |
|---------------------|-----------|
| C(58)-C(59)-H(59B)  | 110.2     |
| C(58)-C(59)-C(60)   | 107.5(14) |
| H(59A)-C(59)-H(59B) | 108.5     |
| C(60)-C(59)-H(59A)  | 110.2     |
| C(60)-C(59)-H(59B)  | 110.2     |
| C(55)-C(60)-C(59)   | 111.7(13) |
| C(55)-C(60)-H(60A)  | 109.3     |
| C(55)-C(60)-H(60B)  | 109.3     |
| C(59)-C(60)-H(60A)  | 109.3     |
| C(59)-C(60)-H(60B)  | 109.3     |
| H(60A)-C(60)-H(60B) | 107.9     |
| S(11)-C(61)-H(61)   | 109.9     |
| C(62)-C(61)-S(11)   | 108.6(9)  |
| C(62)-C(61)-H(61)   | 109.9     |
| C(62)-C(61)-C(66)   | 110.9(11) |
| C(66)-C(61)-S(11)   | 107.5(9)  |
| C(66)-C(61)-H(61)   | 109.9     |
| C(61)-C(62)-H(62A)  | 110.0     |
| C(61)-C(62)-H(62B)  | 110.0     |
| C(61)-C(62)-C(63)   | 108.6(13) |
| H(62A)-C(62)-H(62B) | 108.3     |
| C(63)-C(62)-H(62A)  | 110.0     |
| C(63)-C(62)-H(62B)  | 110.0     |
| C(62)-C(63)-H(63A)  | 109.9     |
| C(62)-C(63)-H(63B)  | 109.9     |
| C(62)-C(63)-C(64)   | 109.0(15) |
| H(63A)-C(63)-H(63B) | 108.3     |
| C(64)-C(63)-H(63A)  | 109.9     |
| C(64)-C(63)-H(63B)  | 109.9     |
| C(63)-C(64)-H(64A)  | 109.9     |

|                     |           |
|---------------------|-----------|
| C(63)-C(64)-H(64B)  | 109.9     |
| H(64A)-C(64)-H(64B) | 108.3     |
| C(65)-C(64)-C(63)   | 108.8(15) |
| C(65)-C(64)-H(64A)  | 109.9     |
| C(65)-C(64)-H(64B)  | 109.9     |
| C(64)-C(65)-H(65A)  | 109.0     |
| C(64)-C(65)-H(65B)  | 109.0     |
| C(64)-C(65)-C(66)   | 112.7(14) |
| H(65A)-C(65)-H(65B) | 107.8     |
| C(66)-C(65)-H(65A)  | 109.0     |
| C(66)-C(65)-H(65B)  | 109.0     |
| C(61)-C(66)-C(65)   | 108.7(11) |
| C(61)-C(66)-H(66A)  | 109.9     |
| C(61)-C(66)-H(66B)  | 109.9     |
| C(65)-C(66)-H(66A)  | 109.9     |
| C(65)-C(66)-H(66B)  | 109.9     |
| H(66A)-C(66)-H(66B) | 108.3     |

---



**Table S5.** Atomic coordinates ( $\times 10^4$ ) and equivalent isotropic displacement parameters ( $\text{\AA}^2 \times 10^3$ ) for  $\text{Au}_{42}(\text{SC}_6\text{H}_{11})_{26}$ .  $U(\text{eq})$  is defined as one third of the trace of the orthogonalized  $U^{ij}$  tensor.

|        | x    | y    | z    | U(eq) |
|--------|------|------|------|-------|
| Au(1)  | 3567 | 2850 | 7335 | 54(1) |
| Au(2)  | 4771 | 2022 | 7885 | 51(1) |
| Au(3)  | 5942 | 1239 | 8432 | 56(1) |
| Au(4)  | 5998 | 2345 | 7775 | 54(1) |
| Au(5)  | 4823 | 3228 | 7176 | 52(1) |
| Au(6)  | 5793 | 1734 | 7061 | 53(1) |
| Au(7)  | 3805 | 3583 | 7950 | 54(1) |
| Au(8)  | 3870 | 4669 | 7295 | 58(1) |
| Au(9)  | 3423 | 3970 | 6662 | 61(1) |
| Au(10) | 4683 | 4310 | 5946 | 66(1) |
| Au(11) | 5005 | 4946 | 6650 | 71(1) |
| Au(12) | 4654 | 2532 | 6516 | 57(1) |
| Au(13) | 5650 | 913  | 6334 | 64(1) |
| Au(14) | 6879 | 409  | 6887 | 61(1) |
| Au(15) | 5863 | 533  | 7648 | 58(1) |
| Au(16) | 4473 | 1418 | 7218 | 55(1) |
| Au(17) | 3552 | 1735 | 7985 | 57(1) |
| Au(18) | 4652 | 256  | 8401 | 63(1) |
| Au(19) | 2084 | 2317 | 7622 | 63(1) |
| Au(20) | 2267 | 3563 | 6964 | 64(1) |
| Au(21) | 3199 | 2187 | 6595 | 62(1) |
| Au(22) | 5802 | 2879 | 6419 | 58(1) |
| Au(23) | 6231 | 3417 | 7177 | 66(1) |
| Au(24) | 7328 | 2329 | 7737 | 66(1) |
| Au(25) | 8966 | 1096 | 7383 | 74(1) |
| Au(26) | 7001 | 860  | 7640 | 60(1) |

|        |      |      |      |        |
|--------|------|------|------|--------|
| Au(27) | 6996 | 1533 | 6080 | 67(1)  |
| Au(28) | 6365 | 3001 | 8498 | 72(1)  |
| Au(29) | 4973 | 3918 | 7860 | 58(1)  |
| Au(30) | 3935 | 4423 | 8699 | 67(1)  |
| Au(31) | 2707 | 4160 | 8576 | 68(1)  |
| Au(32) | 2650 | 5537 | 7911 | 72(1)  |
| Au(33) | 2558 | 4382 | 7431 | 64(1)  |
| Au(34) | 2522 | 3266 | 8106 | 64(1)  |
| Au(35) | 3640 | 2609 | 8656 | 62(1)  |
| Au(36) | 5047 | 2670 | 8540 | 58(1)  |
| Au(37) | 4818 | 972  | 9119 | 64(1)  |
| Au(38) | 7430 | 1116 | 8521 | 64(1)  |
| Au(39) | 7029 | 2022 | 6990 | 64(1)  |
| Au(40) | 967  | 4998 | 8484 | 131(1) |
| Au(41) | 686  | 4600 | 7431 | 76(1)  |
| Au(42) | 8638 | -66  | 6743 | 76(1)  |
| S(1)   | 5923 | 3706 | 5781 | 70(2)  |
| S(2)   | 6263 | 4366 | 6605 | 67(3)  |
| S(3)   | 3786 | 5729 | 6776 | 80(3)  |
| S(4)   | 3424 | 4857 | 6035 | 68(3)  |
| S(5)   | 6260 | 1297 | 5706 | 75(3)  |
| S(6)   | 7894 | 1625 | 6379 | 67(3)  |
| S(7)   | 7888 | -474 | 6536 | 69(3)  |
| S(8)   | 9472 | 332  | 6837 | 81(3)  |
| S(9)   | 8540 | 1878 | 7908 | 69(3)  |
| S(10)  | 5905 | 4136 | 8065 | 98(4)  |
| S(11)  | 3448 | 5602 | 8324 | 64(2)  |
| S(12)  | 1748 | 5610 | 7522 | 74(3)  |
| S(13)  | 1675 | 4489 | 9109 | 143(6) |
| S(14)  | 179  | 5430 | 7936 | 101(4) |

|       |      |      |      |         |
|-------|------|------|------|---------|
| S(15) | 1036 | 3882 | 6873 | 74(3)   |
| S(16) | 3777 | 2698 | 6040 | 63(2)   |
| S(17) | 5048 | 361  | 6859 | 65(3)   |
| S(18) | 5839 | -463 | 8187 | 65(2)   |
| S(19) | 8029 | 217  | 8061 | 62(2)   |
| S(20) | 6981 | 1974 | 9008 | 71(3)   |
| S(21) | 6059 | 274  | 9043 | 64(2)   |
| S(22) | 3604 | 1734 | 9278 | 71(3)   |
| S(23) | 3377 | 804  | 8519 | 63(2)   |
| S(24) | 2540 | 1622 | 7044 | 62(2)   |
| S(25) | 1482 | 3051 | 8175 | 69(3)   |
| S(26) | 4428 | 3313 | 9157 | 69(3)   |
| C(1)  | 5960 | 3277 | 5268 | 76(3)   |
| C(2)  | 5542 | 3845 | 4910 | 76(4)   |
| C(3)  | 5649 | 3543 | 4485 | 78(4)   |
| C(4)  | 6592 | 3213 | 4346 | 80(4)   |
| C(5)  | 6948 | 2624 | 4662 | 80(4)   |
| C(6)  | 6811 | 2912 | 5099 | 78(4)   |
| C(7)  | 6437 | 5055 | 6816 | 90(15)  |
| C(8)  | 6200 | 5749 | 6462 | 125(18) |
| C(9)  | 6355 | 6420 | 6592 | 131(18) |
| C(10) | 7264 | 5889 | 6733 | 190(40) |
| C(11) | 7293 | 5326 | 7096 | 120(20) |
| C(12) | 7126 | 4783 | 6980 | 80(13)  |
| C(13) | 3725 | 6426 | 7133 | 90(4)   |
| C(14) | 3295 | 7174 | 6864 | 94(5)   |
| C(15) | 3261 | 7817 | 7055 | 96(5)   |
| C(16) | 4013 | 7609 | 7200 | 96(5)   |
| C(17) | 4258 | 6891 | 7522 | 95(5)   |
| C(18) | 4419 | 6180 | 7361 | 93(5)   |

|       |       |       |      |         |
|-------|-------|-------|------|---------|
| C(19) | 3170  | 4575  | 5566 | 55(9)   |
| C(20) | 2411  | 4594  | 5663 | 59(9)   |
| C(21) | 2232  | 4431  | 5233 | 71(11)  |
| C(22) | 2307  | 4863  | 4818 | 120(20) |
| C(23) | 3115  | 4836  | 4713 | 78(12)  |
| C(24) | 3212  | 5077  | 5135 | 79(13)  |
| C(25) | 6911  | 422   | 5465 | 81(4)   |
| C(26) | 6691  | -133  | 5597 | 83(4)   |
| C(27) | 7327  | -845  | 5372 | 84(5)   |
| C(28) | 7389  | -697  | 4902 | 83(5)   |
| C(29) | 7524  | -124  | 4763 | 83(4)   |
| C(30) | 7094  | 563   | 4931 | 83(4)   |
| C(31) | 7978  | 2463  | 6089 | 69(11)  |
| C(32) | 8507  | 2264  | 5664 | 63(10)  |
| C(33) | 8654  | 2918  | 5415 | 82(13)  |
| C(34) | 8916  | 3195  | 5708 | 99(17)  |
| C(35) | 8454  | 3349  | 6160 | 98(17)  |
| C(36) | 8310  | 2700  | 6399 | 70(11)  |
| C(37) | 8156  | -1439 | 6851 | 74(12)  |
| C(38) | 7886  | -1774 | 6601 | 96(16)  |
| C(39) | 8146  | -2610 | 6866 | 101(17) |
| C(40) | 8908  | -2964 | 6876 | 87(14)  |
| C(41) | 9213  | -2604 | 7139 | 95(16)  |
| C(42) | 9058  | -1853 | 6881 | 107(19) |
| C(43) | 10164 | -443  | 7108 | 89(15)  |
| C(44) | 10861 | -346  | 7124 | 71(11)  |
| C(45) | 11552 | -1012 | 7272 | 103(18) |
| C(46) | 11320 | -1270 | 7766 | 83(13)  |
| C(47) | 10621 | -1476 | 7782 | 93(15)  |
| C(48) | 10054 | -859  | 7520 | 120(20) |

|       |      |      |       |         |
|-------|------|------|-------|---------|
| C(49) | 8876 | 2555 | 7675  | 60(9)   |
| C(50) | 8419 | 3281 | 7888  | 71(11)  |
| C(51) | 8690 | 3869 | 7690  | 95(16)  |
| C(52) | 9549 | 3515 | 7820  | 81(13)  |
| C(53) | 9947 | 2822 | 7628  | 86(14)  |
| C(54) | 9696 | 2209 | 7796  | 71(11)  |
| C(55) | 5683 | 4764 | 8449  | 111(5)  |
| C(56) | 5327 | 5573 | 8252  | 114(5)  |
| C(57) | 5504 | 6002 | 8528  | 117(6)  |
| C(58) | 6333 | 5659 | 8543  | 117(6)  |
| C(59) | 6588 | 4901 | 8822  | 117(6)  |
| C(60) | 5964 | 4680 | 8900  | 114(5)  |
| C(61) | 2812 | 6233 | 8770  | 81(13)  |
| C(62) | 2350 | 7016 | 8542  | 110(20) |
| C(63) | 1960 | 7373 | 8937  | 140(30) |
| C(64) | 2483 | 7455 | 9201  | 108(19) |
| C(65) | 2930 | 6784 | 9367  | 140(30) |
| C(66) | 3266 | 6249 | 9047  | 150(30) |
| C(67) | 1799 | 6078 | 6957  | 82(13)  |
| C(68) | 1398 | 5978 | 6642  | 60(9)   |
| C(69) | 1399 | 6449 | 6158  | 109(19) |
| C(70) | 1073 | 7297 | 6145  | 107(19) |
| C(71) | 1522 | 7304 | 6525  | 88(14)  |
| C(72) | 1500 | 6951 | 6978  | 75(12)  |
| C(73) | 1629 | 4720 | 9648  | 147(7)  |
| C(74) | 1747 | 4243 | 10107 | 148(7)  |
| C(75) | 2247 | 4371 | 10361 | 149(7)  |
| C(76) | 1872 | 5165 | 10452 | 149(8)  |
| C(77) | 1838 | 5671 | 10007 | 148(7)  |
| C(78) | 1950 | 5257 | 9621  | 148(7)  |

|        |       |       |      |         |
|--------|-------|-------|------|---------|
| C(79)  | -597  | 5312  | 8226 | 107(5)  |
| C(80)  | -894  | 5272  | 8719 | 110(5)  |
| C(81)  | -1711 | 5481  | 8762 | 111(5)  |
| C(82)  | -2067 | 6273  | 8550 | 111(6)  |
| C(83)  | -1798 | 6364  | 8061 | 111(5)  |
| C(84)  | -1230 | 5635  | 7927 | 110(5)  |
| C(85)  | 764   | 4583  | 6330 | 69(11)  |
| C(86)  | 36    | 5269  | 6413 | 110(20) |
| C(87)  | -575  | 5057  | 6589 | 77(12)  |
| C(88)  | -688  | 4636  | 6231 | 90(15)  |
| C(89)  | -38   | 3993  | 6122 | 92(15)  |
| C(90)  | 671   | 4130  | 5997 | 86(14)  |
| C(91)  | 4195  | 2107  | 5583 | 70(11)  |
| C(92)  | 3621  | 1944  | 5437 | 58(9)   |
| C(93)  | 3900  | 1499  | 5068 | 95(16)  |
| C(94)  | 4150  | 2050  | 4615 | 107(19) |
| C(95)  | 4783  | 2069  | 4800 | 87(14)  |
| C(96)  | 4497  | 2475  | 5233 | 97(16)  |
| C(97)  | 4415  | 237   | 6548 | 59(9)   |
| C(98)  | 4055  | -171  | 6879 | 71(11)  |
| C(99)  | 3548  | -340  | 6681 | 76(12)  |
| C(100) | 3887  | -673  | 6250 | 99(17)  |
| C(101) | 4290  | -225  | 5896 | 71(11)  |
| C(102) | 4801  | -143  | 6142 | 75(12)  |
| C(103) | 5713  | -1070 | 7858 | 67(10)  |
| C(104) | 5673  | -1707 | 8220 | 76(12)  |
| C(105) | 5534  | -2209 | 7985 | 80(13)  |
| C(106) | 6194  | -2509 | 7558 | 107(19) |
| C(107) | 6221  | -1870 | 7278 | 79(13)  |
| C(108) | 6348  | -1327 | 7508 | 59(9)   |

|        |      |       |       |         |
|--------|------|-------|-------|---------|
| C(109) | 7928 | -610  | 8341  | 75(12)  |
| C(110) | 8577 | -1047 | 8699  | 61(9)   |
| C(111) | 8492 | -1785 | 8964  | 110(20) |
| C(112) | 8509 | -2232 | 8628  | 79(13)  |
| C(113) | 7925 | -1746 | 8279  | 86(14)  |
| C(114) | 7965 | -1060 | 8042  | 70(11)  |
| C(115) | 7794 | 2077  | 9040  | 72(11)  |
| C(116) | 7476 | 2791  | 9357  | 89(15)  |
| C(117) | 8127 | 3007  | 9367  | 120(20) |
| C(118) | 8743 | 2225  | 9588  | 140(30) |
| C(119) | 9010 | 1599  | 9305  | 92(15)  |
| C(120) | 8440 | 1399  | 9282  | 88(14)  |
| C(121) | 6421 | 492   | 9534  | 65(10)  |
| C(122) | 5944 | 415   | 9962  | 66(10)  |
| C(123) | 6237 | 535   | 10369 | 86(14)  |
| C(124) | 7029 | 8     | 10390 | 110(20) |
| C(125) | 7501 | 39    | 9972  | 60(9)   |
| C(126) | 7124 | 41    | 9555  | 76(12)  |
| C(127) | 3692 | 2097  | 9773  | 66(10)  |
| C(128) | 3044 | 2785  | 9843  | 72(11)  |
| C(129) | 3134 | 3085  | 10253 | 79(13)  |
| C(130) | 3143 | 2508  | 10675 | 84(14)  |
| C(131) | 3785 | 1797  | 10638 | 89(14)  |
| C(132) | 3795 | 1498  | 10201 | 65(10)  |
| C(133) | 3210 | 223   | 8212  | 70(11)  |
| C(134) | 2372 | 452   | 8232  | 78(12)  |
| C(135) | 2213 | 16    | 7952  | 94(16)  |
| C(136) | 2616 | -849  | 8180  | 81(13)  |
| C(137) | 3408 | -1024 | 8130  | 105(18) |
| C(138) | 3616 | -595  | 8426  | 79(13)  |

|        |      |      |       |         |
|--------|------|------|-------|---------|
| C(139) | 1684 | 1933 | 6713  | 75(12)  |
| C(140) | 1377 | 1408 | 6932  | 75(12)  |
| C(141) | 633  | 1661 | 6729  | 94(16)  |
| C(142) | 894  | 1448 | 6218  | 84(14)  |
| C(143) | 1255 | 2009 | 5978  | 120(20) |
| C(144) | 1946 | 1842 | 6235  | 77(12)  |
| C(145) | 1584 | 2405 | 8727  | 82(13)  |
| C(146) | 1412 | 2891 | 9100  | 75(12)  |
| C(147) | 1429 | 2402 | 9573  | 82(13)  |
| C(148) | 888  | 2162 | 9578  | 88(14)  |
| C(149) | 1011 | 1711 | 9217  | 86(14)  |
| C(150) | 977  | 2207 | 8766  | 75(12)  |
| C(151) | 5009 | 3328 | 9511  | 87(14)  |
| C(152) | 5316 | 2628 | 9843  | 83(13)  |
| C(153) | 5813 | 2605 | 10174 | 103(18) |
| C(154) | 5300 | 3254 | 10418 | 110(20) |
| C(155) | 5151 | 3958 | 10090 | 108(19) |
| C(156) | 4652 | 3986 | 9763  | 90(15)  |

---



**Table S6.** Bond lengths [ $\text{\AA}$ ] and angles [ $^\circ$ ] for  $\text{Au}_{42}(\text{S}_6\text{C}_6\text{H}_{11})_{26}$ 

---

| Atom1-Atom2  | Length/ $\text{\AA}$ |
|--------------|----------------------|
| Au(1)-Au(2)  | 2.8569               |
| Au(1)-Au(5)  | 2.9789               |
| Au(1)-Au(7)  | 2.8587               |
| Au(1)-Au(9)  | 2.7056               |
| Au(1)-Au(12) | 3.0291               |
| Au(1)-Au(16) | 2.7494               |
| Au(1)-Au(17) | 2.7334               |
| Au(1)-Au(20) | 2.7023               |
| Au(1)-Au(21) | 3.2059               |
| Au(1)-Au(33) | 2.9361               |
| Au(1)-Au(34) | 2.8930               |
| Au(2)-Au(3)  | 2.7998               |
| Au(2)-Au(4)  | 2.8570               |
| Au(2)-Au(5)  | 2.9876               |
| Au(2)-Au(6)  | 2.9713               |
| Au(2)-Au(7)  | 2.9501               |
| Au(2)-Au(15) | 3.0199               |
| Au(2)-Au(16) | 2.8615               |
| Au(2)-Au(17) | 2.7981               |
| Au(2)-Au(35) | 3.0336               |
| Au(2)-Au(36) | 2.8682               |
| Au(3)-Au(4)  | 2.7556               |
| Au(3)-Au(15) | 3.0974               |
| Au(3)-Au(26) | 2.9482               |
| Au(3)-Au(36) | 2.7361               |
| Au(3)-Au(37) | 3.0345               |
| Au(3)-Au(38) | 3.0126               |

|              |        |
|--------------|--------|
| Au(3)-S(21)  | 2.3920 |
| Au(4)-Au(5)  | 2.9230 |
| Au(4)-Au(6)  | 2.8950 |
| Au(4)-Au(23) | 2.7509 |
| Au(4)-Au(24) | 2.7120 |
| Au(4)-Au(26) | 2.8854 |
| Au(4)-Au(28) | 3.1514 |
| Au(4)-Au(29) | 3.0023 |
| Au(4)-Au(36) | 2.7668 |
| Au(4)-Au(39) | 2.8944 |
| Au(5)-Au(6)  | 2.8712 |
| Au(5)-Au(7)  | 2.8615 |
| Au(5)-Au(8)  | 2.7821 |
| Au(5)-Au(9)  | 3.0894 |
| Au(5)-Au(12) | 2.8437 |
| Au(5)-Au(22) | 2.7807 |
| Au(5)-Au(23) | 3.1043 |
| Au(5)-Au(29) | 2.8777 |
| Au(6)-Au(12) | 2.7539 |
| Au(6)-Au(13) | 3.1716 |
| Au(6)-Au(14) | 2.7203 |
| Au(6)-Au(15) | 2.7172 |
| Au(6)-Au(16) | 3.0299 |
| Au(6)-Au(22) | 2.7600 |
| Au(6)-Au(26) | 2.9267 |
| Au(6)-Au(39) | 2.8393 |
| Au(7)-Au(8)  | 2.7277 |
| Au(7)-Au(29) | 2.7587 |
| Au(7)-Au(30) | 3.2391 |
| Au(7)-Au(31) | 2.6861 |

|               |        |
|---------------|--------|
| Au(7)-Au(33)  | 2.8619 |
| Au(7)-Au(34)  | 2.9562 |
| Au(7)-Au(35)  | 2.7311 |
| Au(7)-Au(36)  | 3.0014 |
| Au(8)-Au(9)   | 3.0932 |
| Au(8)-Au(11)  | 2.9964 |
| Au(8)-Au(29)  | 2.7349 |
| Au(8)-Au(32)  | 2.9585 |
| Au(8)-Au(33)  | 2.9772 |
| Au(8)-S(3)    | 2.3885 |
| Au(9)-Au(10)  | 3.3540 |
| Au(9)-Au(12)  | 2.9595 |
| Au(9)-Au(20)  | 2.8403 |
| Au(9)-Au(33)  | 2.7275 |
| Au(9)-S(4)    | 2.3695 |
| Au(10)-Au(11) | 3.0234 |
| Au(10)-Au(22) | 3.0425 |
| Au(10)-S(1)   | 2.2937 |
| Au(10)-S(4)   | 2.3020 |
| Au(11)-Au(23) | 3.3028 |
| Au(11)-S(2)   | 2.2980 |
| Au(11)-S(3)   | 2.3017 |
| Au(12)-Au(13) | 3.1384 |
| Au(12)-Au(16) | 2.9311 |
| Au(12)-Au(21) | 3.3536 |
| Au(12)-Au(22) | 2.7341 |
| Au(12)-S(16)  | 2.3529 |
| Au(13)-Au(14) | 2.9283 |
| Au(13)-Au(16) | 3.3040 |
| Au(13)-S(5)   | 2.3236 |

|               |        |
|---------------|--------|
| Au(13)-S(17)  | 2.3101 |
| Au(14)-Au(15) | 2.8263 |
| Au(14)-Au(26) | 2.7245 |
| Au(14)-Au(27) | 3.0918 |
| Au(14)-Au(42) | 3.2736 |
| Au(14)-S(7)   | 2.3247 |
| Au(15)-Au(16) | 2.9505 |
| Au(15)-Au(18) | 3.2800 |
| Au(15)-Au(26) | 2.7214 |
| Au(15)-S(18)  | 2.3806 |
| Au(16)-Au(17) | 2.7442 |
| Au(16)-Au(21) | 3.0918 |
| Au(16)-S(17)  | 2.3576 |
| Au(17)-Au(18) | 3.0200 |
| Au(17)-Au(19) | 3.0025 |
| Au(17)-Au(34) | 2.9604 |
| Au(17)-Au(35) | 3.0638 |
| Au(17)-S(23)  | 2.3836 |
| Au(18)-Au(37) | 3.0168 |
| Au(18)-S(18)  | 2.2723 |
| Au(18)-S(23)  | 2.3357 |
| Au(19)-Au(20) | 3.0660 |
| Au(19)-Au(34) | 3.1734 |
| Au(19)-S(24)  | 2.2994 |
| Au(19)-S(25)  | 2.3029 |
| Au(20)-Au(21) | 2.9431 |
| Au(20)-Au(33) | 2.7255 |
| Au(20)-Au(41) | 3.2526 |
| Au(20)-S(15)  | 2.3610 |
| Au(21)-S(16)  | 2.2796 |

|               |        |
|---------------|--------|
| Au(21)-S(24)  | 2.3040 |
| Au(22)-Au(23) | 3.1522 |
| Au(22)-Au(27) | 2.9918 |
| Au(22)-Au(39) | 2.9345 |
| Au(22)-S(1)   | 2.3782 |
| Au(23)-Au(24) | 2.8491 |
| Au(23)-Au(29) | 2.9643 |
| Au(23)-Au(39) | 2.7207 |
| Au(23)-S(2)   | 2.3690 |
| Au(24)-Au(25) | 3.3349 |
| Au(24)-Au(28) | 2.9179 |
| Au(24)-Au(38) | 3.0529 |
| Au(24)-Au(39) | 2.7089 |
| Au(24)-S(9)   | 2.3373 |
| Au(25)-S(8)   | 2.3088 |
| Au(25)-S(9)   | 2.2873 |
| Au(26)-Au(38) | 3.1627 |
| Au(26)-Au(39) | 2.8101 |
| Au(26)-S(19)  | 2.3455 |
| Au(27)-Au(39) | 3.1500 |
| Au(27)-S(5)   | 2.3021 |
| Au(27)-S(6)   | 2.2847 |
| Au(28)-Au(29) | 3.3012 |
| Au(28)-Au(36) | 3.0748 |
| Au(28)-S(10)  | 2.2969 |
| Au(28)-S(20)  | 2.3186 |
| Au(29)-Au(30) | 3.0716 |
| Au(29)-Au(36) | 2.9300 |
| Au(29)-S(10)  | 2.3624 |
| Au(30)-Au(31) | 2.9177 |

|               |        |
|---------------|--------|
| Au(30)-Au(36) | 3.3788 |
| Au(30)-S(11)  | 2.2976 |
| Au(30)-S(26)  | 2.3012 |
| Au(31)-Au(32) | 3.1151 |
| Au(31)-Au(34) | 2.7397 |
| Au(31)-Au(35) | 2.8748 |
| Au(31)-Au(40) | 3.2205 |
| Au(31)-S(13)  | 2.3729 |
| Au(32)-Au(33) | 3.1328 |
| Au(32)-S(11)  | 2.2873 |
| Au(32)-S(12)  | 2.2916 |
| Au(33)-Au(34) | 2.7887 |
| Au(33)-S(12)  | 2.3629 |
| Au(34)-Au(35) | 2.7210 |
| Au(34)-S(25)  | 2.3543 |
| Au(35)-Au(36) | 2.9243 |
| Au(35)-Au(37) | 3.3186 |
| Au(35)-S(22)  | 2.3601 |
| Au(36)-S(26)  | 2.3679 |
| Au(37)-S(21)  | 2.2910 |
| Au(37)-S(22)  | 2.2987 |
| Au(38)-S(19)  | 2.3107 |
| Au(38)-S(20)  | 2.3060 |
| Au(39)-S(6)   | 2.3463 |
| Au(40)-S(13)  | 2.3510 |
| Au(40)-S(14)  | 2.2698 |
| Au(41)-S(14)  | 2.3019 |
| Au(41)-S(15)  | 2.2902 |
| Au(42)-S(7)   | 2.2872 |
| Au(42)-S(8)   | 2.2977 |

|              |        |
|--------------|--------|
| S(1)-C(1)    | 1.9195 |
| S(2)-C(7)    | 1.8693 |
| S(3)-C(13)   | 1.9245 |
| S(4)-C(19)   | 1.8729 |
| S(5)-C(25)   | 1.9013 |
| S(6)-C(31)   | 1.8558 |
| S(7)-C(37)   | 1.9027 |
| S(8)-C(43)   | 1.7441 |
| S(9)-C(49)   | 1.8168 |
| S(10)-C(55)  | 1.7766 |
| S(11)-C(61)  | 1.9585 |
| S(12)-C(67)  | 1.8085 |
| S(13)-C(73)  | 1.7730 |
| S(14)-C(79)  | 1.7950 |
| S(15)-C(85)  | 1.9335 |
| S(16)-C(91)  | 1.8725 |
| S(17)-C(97)  | 1.8594 |
| S(18)-C(103) | 1.8819 |
| S(19)-C(109) | 1.8418 |
| S(20)-C(115) | 1.8055 |
| S(21)-C(121) | 1.9814 |
| S(22)-C(127) | 1.8795 |
| S(23)-C(133) | 1.8377 |
| S(24)-C(139) | 1.9513 |
| S(25)-C(145) | 1.8995 |
| S(26)-C(151) | 1.7472 |
| C(1)-H(1)    | 1.0000 |
| C(1)-C(2)    | 1.4730 |
| C(1)-C(6)    | 1.6015 |
| C(2)-H(2A)   | 0.9900 |

|              |        |
|--------------|--------|
| C(2)-H(2B)   | 0.9900 |
| C(2)-C(3)    | 1.4858 |
| C(3)-H(3A)   | 0.9900 |
| C(3)-H(3B)   | 0.9900 |
| C(3)-C(4)    | 1.7485 |
| C(4)-H(4A)   | 0.9900 |
| C(4)-H(4B)   | 0.9900 |
| C(4)-C(5)    | 1.3742 |
| C(5)-H(5A)   | 0.9900 |
| C(5)-H(5B)   | 0.9900 |
| C(5)-C(6)    | 1.4978 |
| C(6)-H(6A)   | 0.9900 |
| C(6)-H(6B)   | 0.9900 |
| C(7)-H(7)    | 1.0000 |
| C(7)-C(8)    | 1.5396 |
| C(7)-C(12)   | 1.4011 |
| C(8)-H(8A)   | 0.9900 |
| C(8)-H(8B)   | 0.9900 |
| C(8)-C(9)    | 1.6936 |
| C(9)-H(9A)   | 0.9900 |
| C(9)-H(9B)   | 0.9900 |
| C(9)-C(10)   | 1.7566 |
| C(10)-H(10A) | 0.9900 |
| C(10)-H(10B) | 0.9900 |
| C(10)-C(11)  | 1.4215 |
| C(11)-H(11A) | 0.9900 |
| C(11)-H(11B) | 0.9900 |
| C(11)-C(12)  | 1.4381 |
| C(12)-H(12A) | 0.9900 |
| C(12)-H(12B) | 0.9900 |



|              |        |
|--------------|--------|
| C(13)-H(13)  | 1.0000 |
| C(13)-C(14)  | 1.5242 |
| C(13)-C(18)  | 1.5139 |
| C(14)-H(14A) | 0.9900 |
| C(14)-H(14B) | 0.9900 |
| C(14)-C(15)  | 1.5256 |
| C(15)-H(15A) | 0.9900 |
| C(15)-H(15B) | 0.9900 |
| C(15)-C(16)  | 1.5221 |
| C(16)-H(16A) | 0.9900 |
| C(16)-H(16B) | 0.9900 |
| C(16)-C(17)  | 1.5215 |
| C(17)-H(17A) | 0.9900 |
| C(17)-H(17B) | 0.9900 |
| C(17)-C(18)  | 1.5189 |
| C(18)-H(18A) | 0.9900 |
| C(18)-H(18B) | 0.9900 |
| C(19)-H(19)  | 1.0000 |
| C(19)-C(20)  | 1.5292 |
| C(19)-C(24)  | 1.5183 |
| C(20)-H(20A) | 0.9900 |
| C(20)-H(20B) | 0.9900 |
| C(20)-C(21)  | 1.5510 |
| C(21)-H(21A) | 0.9900 |
| C(21)-H(21B) | 0.9900 |
| C(21)-C(22)  | 1.4242 |
| C(22)-H(22A) | 0.9900 |
| C(22)-H(22B) | 0.9900 |
| C(22)-C(23)  | 1.6226 |
| C(23)-H(23A) | 0.9900 |

|              |        |
|--------------|--------|
| C(23)-H(23B) | 0.9900 |
| C(23)-C(24)  | 1.5398 |
| C(24)-H(24A) | 0.9900 |
| C(24)-H(24B) | 0.9900 |
| C(25)-H(25)  | 1.0000 |
| C(25)-C(26)  | 1.3866 |
| C(25)-C(30)  | 1.6077 |
| C(26)-H(26A) | 0.9900 |
| C(26)-H(26B) | 0.9900 |
| C(26)-C(27)  | 1.6458 |
| C(27)-H(27A) | 0.9900 |
| C(27)-H(27B) | 0.9900 |
| C(27)-C(28)  | 1.3954 |
| C(28)-H(28A) | 0.9900 |
| C(28)-H(28B) | 0.9900 |
| C(28)-C(29)  | 1.3169 |
| C(29)-H(29A) | 0.9900 |
| C(29)-H(29B) | 0.9900 |
| C(29)-C(30)  | 1.4370 |
| C(30)-H(30A) | 0.9900 |
| C(30)-H(30B) | 0.9900 |
| C(31)-H(31)  | 1.0000 |
| C(31)-C(32)  | 1.5401 |
| C(31)-C(36)  | 1.5168 |
| C(32)-H(32A) | 0.9900 |
| C(32)-H(32B) | 0.9900 |
| C(32)-C(33)  | 1.5490 |
| C(33)-H(33A) | 0.9900 |
| C(33)-H(33B) | 0.9900 |
| C(33)-C(34)  | 1.4337 |

|              |        |
|--------------|--------|
| C(34)-H(34A) | 0.9900 |
| C(34)-H(34B) | 0.9900 |
| C(34)-C(35)  | 1.5402 |
| C(35)-H(35A) | 0.9900 |
| C(35)-H(35B) | 0.9900 |
| C(35)-C(36)  | 1.5282 |
| C(36)-H(36A) | 0.9900 |
| C(36)-H(36B) | 0.9900 |
| C(37)-H(37)  | 1.0000 |
| C(37)-C(38)  | 1.4404 |
| C(37)-C(42)  | 1.6617 |
| C(38)-H(38A) | 0.9900 |
| C(38)-H(38B) | 0.9900 |
| C(38)-C(39)  | 1.6349 |
| C(39)-H(39A) | 0.9900 |
| C(39)-H(39B) | 0.9900 |
| C(39)-C(40)  | 1.3998 |
| C(40)-H(40A) | 0.9900 |
| C(40)-H(40B) | 0.9900 |
| C(40)-C(41)  | 1.5569 |
| C(41)-H(41A) | 0.9900 |
| C(41)-H(41B) | 0.9900 |
| C(41)-C(42)  | 1.5085 |
| C(42)-H(42A) | 0.9900 |
| C(42)-H(42B) | 0.9900 |
| C(43)-H(43)  | 1.0000 |
| C(43)-C(44)  | 1.5493 |
| C(43)-C(48)  | 1.4201 |
| C(44)-H(44A) | 0.9900 |
| C(44)-H(44B) | 0.9900 |

|              |        |
|--------------|--------|
| C(44)-C(45)  | 1.5145 |
| C(45)-H(45A) | 0.9900 |
| C(45)-H(45B) | 0.9900 |
| C(45)-C(46)  | 1.5668 |
| C(46)-H(46A) | 0.9900 |
| C(46)-H(46B) | 0.9900 |
| C(46)-C(47)  | 1.6739 |
| C(47)-H(47A) | 0.9900 |
| C(47)-H(47B) | 0.9900 |
| C(47)-C(48)  | 1.4684 |
| C(48)-H(48A) | 0.9900 |
| C(48)-H(48B) | 0.9900 |
| C(49)-H(49)  | 1.0000 |
| C(49)-C(50)  | 1.5712 |
| C(49)-C(54)  | 1.5777 |
| C(50)-H(50A) | 0.9900 |
| C(50)-H(50B) | 0.9900 |
| C(50)-C(51)  | 1.5442 |
| C(51)-H(51A) | 0.9900 |
| C(51)-H(51B) | 0.9900 |
| C(51)-C(52)  | 1.6579 |
| C(52)-H(52A) | 0.9900 |
| C(52)-H(52B) | 0.9900 |
| C(52)-C(53)  | 1.4757 |
| C(53)-H(53A) | 0.9900 |
| C(53)-H(53B) | 0.9900 |
| C(53)-C(54)  | 1.5510 |
| C(54)-H(54A) | 0.9900 |
| C(54)-H(54B) | 0.9900 |
| C(55)-C(56)  | 1.5229 |

|              |        |
|--------------|--------|
| C(55)-C(60)  | 1.5198 |
| C(56)-H(56A) | 0.9900 |
| C(56)-H(56B) | 0.9900 |
| C(56)-C(57)  | 1.5237 |
| C(57)-H(57A) | 0.9900 |
| C(57)-H(57B) | 0.9900 |
| C(57)-C(58)  | 1.5264 |
| C(58)-H(58A) | 0.9900 |
| C(58)-H(58B) | 0.9900 |
| C(58)-C(59)  | 1.5222 |
| C(59)-H(59A) | 0.9900 |
| C(59)-H(59B) | 0.9900 |
| C(59)-C(60)  | 1.5235 |
| C(60)-H(60A) | 0.9900 |
| C(60)-H(60B) | 0.9900 |
| C(61)-H(61)  | 1.0000 |
| C(61)-C(62)  | 1.5390 |
| C(61)-C(66)  | 1.3714 |
| C(62)-H(62A) | 0.9900 |
| C(62)-H(62B) | 0.9900 |
| C(62)-C(63)  | 1.4602 |
| C(63)-H(63A) | 0.9900 |
| C(63)-H(63B) | 0.9900 |
| C(63)-C(64)  | 1.5288 |
| C(64)-H(64A) | 0.9900 |
| C(64)-H(64B) | 0.9900 |
| C(64)-C(65)  | 1.3159 |
| C(65)-H(65A) | 0.9900 |
| C(65)-H(65B) | 0.9900 |
| C(65)-C(66)  | 1.4713 |

|              |        |
|--------------|--------|
| C(66)-H(66A) | 0.9900 |
| C(66)-H(66B) | 0.9900 |
| C(67)-H(67)  | 1.0000 |
| C(67)-C(68)  | 1.4611 |
| C(67)-C(72)  | 1.6345 |
| C(68)-H(68A) | 0.9900 |
| C(68)-H(68B) | 0.9900 |
| C(68)-C(69)  | 1.5934 |
| C(69)-H(69A) | 0.9900 |
| C(69)-H(69B) | 0.9900 |
| C(69)-C(70)  | 1.5639 |
| C(70)-H(70A) | 0.9900 |
| C(70)-H(70B) | 0.9900 |
| C(70)-C(71)  | 1.5985 |
| C(71)-H(71A) | 0.9900 |
| C(71)-H(71B) | 0.9900 |
| C(71)-C(72)  | 1.4259 |
| C(72)-H(72A) | 0.9900 |
| C(72)-H(72B) | 0.9900 |
| C(73)-H(73)  | 1.0000 |
| C(73)-C(74)  | 1.5208 |
| C(73)-C(78)  | 1.5189 |
| C(74)-H(74A) | 0.9900 |
| C(74)-H(74B) | 0.9900 |
| C(74)-C(75)  | 1.5247 |
| C(75)-H(75A) | 0.9900 |
| C(75)-H(75B) | 0.9900 |
| C(75)-C(76)  | 1.5260 |
| C(76)-H(76A) | 0.9900 |
| C(76)-H(76B) | 0.9900 |

|              |        |
|--------------|--------|
| C(76)-C(77)  | 1.5273 |
| C(77)-H(77A) | 0.9900 |
| C(77)-H(77B) | 0.9900 |
| C(77)-C(78)  | 1.5169 |
| C(78)-H(78A) | 0.9900 |
| C(78)-H(78B) | 0.9900 |
| C(79)-H(79)  | 1.0000 |
| C(79)-C(80)  | 1.5271 |
| C(79)-C(84)  | 1.5193 |
| C(80)-H(80A) | 0.9900 |
| C(80)-H(80B) | 0.9900 |
| C(80)-C(81)  | 1.5242 |
| C(81)-H(81A) | 0.9900 |
| C(81)-H(81B) | 0.9900 |
| C(81)-C(82)  | 1.5066 |
| C(82)-H(82A) | 0.9900 |
| C(82)-H(82B) | 0.9900 |
| C(82)-C(83)  | 1.5062 |
| C(83)-H(83A) | 0.9900 |
| C(83)-H(83B) | 0.9900 |
| C(83)-C(84)  | 1.5145 |
| C(84)-H(84A) | 0.9900 |
| C(84)-H(84B) | 0.9900 |
| C(85)-H(85)  | 1.0000 |
| C(85)-C(86)  | 1.5493 |
| C(85)-C(90)  | 1.5975 |
| C(86)-H(86A) | 0.9900 |
| C(86)-H(86B) | 0.9900 |
| C(86)-C(87)  | 1.5066 |
| C(87)-H(87A) | 0.9900 |

|              |        |
|--------------|--------|
| C(87)-H(87B) | 0.9900 |
| C(87)-C(88)  | 1.6268 |
| C(88)-H(88A) | 0.9900 |
| C(88)-H(88B) | 0.9900 |
| C(88)-C(89)  | 1.4411 |
| C(89)-H(89A) | 0.9900 |
| C(89)-H(89B) | 0.9900 |
| C(89)-C(90)  | 1.5892 |
| C(90)-H(90A) | 0.9900 |
| C(90)-H(90B) | 0.9900 |
| C(91)-H(91)  | 1.0000 |
| C(91)-C(92)  | 1.5197 |
| C(91)-C(96)  | 1.4150 |
| C(92)-H(92A) | 0.9900 |
| C(92)-H(92B) | 0.9900 |
| C(92)-C(93)  | 1.4699 |
| C(93)-H(93A) | 0.9900 |
| C(93)-H(93B) | 0.9900 |
| C(93)-C(94)  | 1.7746 |
| C(94)-H(94A) | 0.9900 |
| C(94)-H(94B) | 0.9900 |
| C(94)-C(95)  | 1.5198 |
| C(95)-H(95A) | 0.9900 |
| C(95)-H(95B) | 0.9900 |
| C(95)-C(96)  | 1.5898 |
| C(96)-H(96A) | 0.9900 |
| C(96)-H(96B) | 0.9900 |
| C(97)-H(97)  | 1.0000 |
| C(97)-C(98)  | 1.5098 |
| C(97)-C(102) | 1.5104 |



|               |        |
|---------------|--------|
| C(98)-H(98A)  | 0.9900 |
| C(98)-H(98B)  | 0.9900 |
| C(98)-C(99)   | 1.4864 |
| C(99)-H(99A)  | 0.9900 |
| C(99)-H(99B)  | 0.9900 |
| C(99)-C(100)  | 1.5180 |
| C(100)-H(10C) | 0.9900 |
| C(100)-H(10D) | 0.9900 |
| C(100)-C(101) | 1.6525 |
| C(101)-H(10E) | 0.9900 |
| C(101)-H(10F) | 0.9900 |
| C(101)-C(102) | 1.4718 |
| C(102)-H(10G) | 0.9900 |
| C(102)-H(10H) | 0.9900 |
| C(103)-H(103) | 1.0000 |
| C(103)-C(104) | 1.5655 |
| C(103)-C(108) | 1.5059 |
| C(104)-H(10I) | 0.9900 |
| C(104)-H(10J) | 0.9900 |
| C(104)-C(105) | 1.5227 |
| C(105)-H(10K) | 0.9900 |
| C(105)-H(10L) | 0.9900 |
| C(105)-C(106) | 1.7035 |
| C(106)-H(10M) | 0.9900 |
| C(106)-H(10N) | 0.9900 |
| C(106)-C(107) | 1.4439 |
| C(107)-H(10O) | 0.9900 |
| C(107)-H(10P) | 0.9900 |
| C(107)-C(108) | 1.5712 |
| C(108)-H(10Q) | 0.9900 |

|               |        |
|---------------|--------|
| C(108)-H(10R) | 0.9900 |
| C(109)-H(109) | 1.0000 |
| C(109)-C(110) | 1.6593 |
| C(109)-C(114) | 1.3973 |
| C(110)-H(11C) | 0.9900 |
| C(110)-H(11D) | 0.9900 |
| C(110)-C(111) | 1.6513 |
| C(111)-H(11E) | 0.9900 |
| C(111)-H(11F) | 0.9900 |
| C(111)-C(112) | 1.4968 |
| C(112)-H(11G) | 0.9900 |
| C(112)-H(11H) | 0.9900 |
| C(112)-C(113) | 1.5674 |
| C(113)-H(11I) | 0.9900 |
| C(113)-H(11J) | 0.9900 |
| C(113)-C(114) | 1.4917 |
| C(114)-H(11K) | 0.9900 |
| C(114)-H(11L) | 0.9900 |
| C(115)-H(115) | 1.0000 |
| C(115)-C(116) | 1.7398 |
| C(115)-C(120) | 1.5726 |
| C(116)-H(11M) | 0.9900 |
| C(116)-H(11N) | 0.9900 |
| C(116)-C(117) | 1.6039 |
| C(117)-H(11O) | 0.9900 |
| C(117)-H(11P) | 0.9900 |
| C(117)-C(118) | 1.6253 |
| C(118)-H(11Q) | 0.9900 |
| C(118)-H(11R) | 0.9900 |
| C(118)-C(119) | 1.5373 |

|               |        |
|---------------|--------|
| C(119)-H(11S) | 0.9900 |
| C(119)-H(11T) | 0.9900 |
| C(119)-C(120) | 1.4305 |
| C(120)-H(12C) | 0.9900 |
| C(120)-H(12D) | 0.9900 |
| C(121)-H(121) | 1.0000 |
| C(121)-C(122) | 1.5272 |
| C(121)-C(126) | 1.3204 |
| C(122)-H(12E) | 0.9900 |
| C(122)-H(12F) | 0.9900 |
| C(122)-C(123) | 1.5688 |
| C(123)-H(12G) | 0.9900 |
| C(123)-H(12H) | 0.9900 |
| C(123)-C(124) | 1.4955 |
| C(124)-H(12I) | 0.9900 |
| C(124)-H(12J) | 0.9900 |
| C(124)-C(125) | 1.4807 |
| C(125)-H(12K) | 0.9900 |
| C(125)-H(12L) | 0.9900 |
| C(125)-C(126) | 1.5892 |
| C(126)-H(12M) | 0.9900 |
| C(126)-H(12N) | 0.9900 |
| C(127)-H(127) | 1.0000 |
| C(127)-C(128) | 1.4660 |
| C(127)-C(132) | 1.5752 |
| C(128)-H(12O) | 0.9900 |
| C(128)-H(12P) | 0.9900 |
| C(128)-C(129) | 1.5699 |
| C(129)-C(130) | 1.5649 |
| C(130)-H(13A) | 0.9900 |

|               |        |
|---------------|--------|
| C(130)-H(13B) | 0.9900 |
| C(130)-C(131) | 1.4730 |
| C(131)-H(13C) | 0.9900 |
| C(131)-H(13D) | 0.9900 |
| C(131)-C(132) | 1.5664 |
| C(132)-H(13E) | 0.9900 |
| C(132)-H(13F) | 0.9900 |
| C(133)-H(133) | 1.0000 |
| C(133)-C(134) | 1.5631 |
| C(133)-C(138) | 1.5591 |
| C(134)-H(13G) | 0.9900 |
| C(134)-H(13H) | 0.9900 |
| C(134)-C(135) | 1.5252 |
| C(135)-H(13I) | 0.9900 |
| C(135)-H(13J) | 0.9900 |
| C(135)-C(136) | 1.6444 |
| C(136)-H(13K) | 0.9900 |
| C(136)-H(13L) | 0.9900 |
| C(136)-C(137) | 1.4905 |
| C(137)-H(13M) | 0.9900 |
| C(137)-H(13N) | 0.9900 |
| C(137)-C(138) | 1.6062 |
| C(138)-H(13O) | 0.9900 |
| C(138)-H(13P) | 0.9900 |
| C(139)-H(139) | 1.0000 |
| C(139)-C(140) | 1.4958 |
| C(139)-C(144) | 1.4831 |
| C(140)-H(14C) | 0.9900 |
| C(140)-H(14D) | 0.9900 |
| C(140)-C(141) | 1.5641 |

|               |        |
|---------------|--------|
| C(141)-H(14E) | 0.9900 |
| C(141)-H(14F) | 0.9900 |
| C(141)-C(142) | 1.6373 |
| C(142)-H(14G) | 0.9900 |
| C(142)-H(14H) | 0.9900 |
| C(142)-C(143) | 1.6500 |
| C(143)-H(14I) | 0.9900 |
| C(143)-H(14J) | 0.9900 |
| C(143)-C(144) | 1.5987 |
| C(144)-H(14K) | 0.9900 |
| C(144)-H(14L) | 0.9900 |
| C(145)-H(145) | 1.0000 |
| C(145)-C(146) | 1.5580 |
| C(145)-C(150) | 1.4678 |
| C(146)-H(14M) | 0.9900 |
| C(146)-H(14N) | 0.9900 |
| C(146)-C(147) | 1.5811 |
| C(147)-H(14O) | 0.9900 |
| C(147)-H(14P) | 0.9900 |
| C(147)-C(148) | 1.4131 |
| C(148)-H(14Q) | 0.9900 |
| C(148)-H(14R) | 0.9900 |
| C(148)-C(149) | 1.5015 |
| C(149)-H(14S) | 0.9900 |
| C(149)-H(14T) | 0.9900 |
| C(149)-C(150) | 1.5293 |
| C(150)-H(15C) | 0.9900 |
| C(150)-H(15D) | 0.9900 |
| C(151)-H(151) | 1.0000 |
| C(151)-C(152) | 1.5165 |

|                         |          |
|-------------------------|----------|
| C(151)-C(156)           | 1.5187   |
| C(152)-H(15E)           | 0.9900   |
| C(152)-H(15F)           | 0.9900   |
| C(152)-C(153)           | 1.5255   |
| C(153)-H(15G)           | 0.9900   |
| C(153)-H(15H)           | 0.9900   |
| C(153)-C(154)           | 1.5243   |
| C(154)-H(15I)           | 0.9900   |
| C(154)-H(15J)           | 0.9900   |
| C(154)-C(155)           | 1.5240   |
| C(155)-H(15K)           | 0.9900   |
| C(155)-H(15L)           | 0.9900   |
| C(155)-C(156)           | 1.5171   |
| C(156)-H(15M)           | 0.9900   |
| C(156)-H(15N)           | 0.9900   |
| atom(1)-atom(2)-atom(3) | angle/ ° |
| Au(2)-Au(1)-Au(5)       | 61.5     |
| Au(2)-Au(1)-Au(7)       | 62.1     |
| Au(2)-Au(1)-Au(12)      | 88.3     |
| Au(2)-Au(1)-Au(21)      | 123.3    |
| Au(2)-Au(1)-Au(33)      | 121.2    |
| Au(2)-Au(1)-Au(34)      | 92.8     |
| Au(5)-Au(1)-Au(12)      | 56.5     |
| Au(5)-Au(1)-Au(21)      | 121.3    |
| Au(7)-Au(1)-Au(5)       | 58.7     |
| Au(7)-Au(1)-Au(12)      | 115.1    |
| Au(7)-Au(1)-Au(21)      | 174.3    |
| Au(7)-Au(1)-Au(33)      | 59.2     |
| Au(7)-Au(1)-Au(34)      | 61.9     |
| Au(9)-Au(1)-Au(2)       | 127.2    |

|                     |       |
|---------------------|-------|
| Au(9)-Au(1)-Au(5)   | 65.6  |
| Au(9)-Au(1)-Au(7)   | 90.9  |
| Au(9)-Au(1)-Au(12)  | 61.8  |
| Au(9)-Au(1)-Au(16)  | 121.4 |
| Au(9)-Au(1)-Au(17)  | 172.8 |
| Au(9)-Au(1)-Au(21)  | 84.2  |
| Au(9)-Au(1)-Au(33)  | 57.6  |
| Au(9)-Au(1)-Au(34)  | 114.4 |
| Au(12)-Au(1)-Au(21) | 65.0  |
| Au(16)-Au(1)-Au(2)  | 61.3  |
| Au(16)-Au(1)-Au(5)  | 91.7  |
| Au(16)-Au(1)-Au(7)  | 123.4 |
| Au(16)-Au(1)-Au(12) | 60.7  |
| Au(16)-Au(1)-Au(21) | 62.0  |
| Au(16)-Au(1)-Au(33) | 177.4 |
| Au(16)-Au(1)-Au(34) | 123.4 |
| Au(17)-Au(1)-Au(2)  | 60.0  |
| Au(17)-Au(1)-Au(5)  | 121.6 |
| Au(17)-Au(1)-Au(7)  | 93.7  |
| Au(17)-Au(1)-Au(12) | 120.6 |
| Au(17)-Au(1)-Au(16) | 60.1  |
| Au(17)-Au(1)-Au(21) | 90.9  |
| Au(17)-Au(1)-Au(33) | 120.6 |
| Au(17)-Au(1)-Au(34) | 63.4  |
| Au(20)-Au(1)-Au(2)  | 168.2 |
| Au(20)-Au(1)-Au(5)  | 128.6 |
| Au(20)-Au(1)-Au(7)  | 116.0 |
| Au(20)-Au(1)-Au(9)  | 63.4  |
| Au(20)-Au(1)-Au(12) | 102.5 |
| Au(20)-Au(1)-Au(16) | 119.8 |

|                     |       |
|---------------------|-------|
| Au(20)-Au(1)-Au(17) | 109.5 |
| Au(20)-Au(1)-Au(21) | 59.0  |
| Au(20)-Au(1)-Au(33) | 57.6  |
| Au(20)-Au(1)-Au(34) | 76.9  |
| Au(33)-Au(1)-Au(5)  | 89.9  |
| Au(33)-Au(1)-Au(12) | 118.8 |
| Au(33)-Au(1)-Au(21) | 115.4 |
| Au(34)-Au(1)-Au(5)  | 120.5 |
| Au(34)-Au(1)-Au(12) | 175.6 |
| Au(34)-Au(1)-Au(21) | 117.6 |
| Au(34)-Au(1)-Au(33) | 57.2  |
| Au(1)-Au(2)-Au(4)   | 121.2 |
| Au(1)-Au(2)-Au(5)   | 61.2  |
| Au(1)-Au(2)-Au(6)   | 89.8  |
| Au(1)-Au(2)-Au(7)   | 59.0  |
| Au(1)-Au(2)-Au(15)  | 117.1 |
| Au(1)-Au(2)-Au(16)  | 57.5  |
| Au(1)-Au(2)-Au(35)  | 84.5  |
| Au(1)-Au(2)-Au(36)  | 121.0 |
| Au(3)-Au(2)-Au(1)   | 178.7 |
| Au(3)-Au(2)-Au(4)   | 58.3  |
| Au(3)-Au(2)-Au(5)   | 118.3 |
| Au(3)-Au(2)-Au(6)   | 90.9  |
| Au(3)-Au(2)-Au(7)   | 119.8 |
| Au(3)-Au(2)-Au(15)  | 64.2  |
| Au(3)-Au(2)-Au(16)  | 123.8 |
| Au(3)-Au(2)-Au(35)  | 94.7  |
| Au(3)-Au(2)-Au(36)  | 57.7  |
| Au(4)-Au(2)-Au(5)   | 60.0  |
| Au(4)-Au(2)-Au(6)   | 59.5  |



|                     |       |
|---------------------|-------|
| Au(4)-Au(2)-Au(7)   | 88.6  |
| Au(4)-Au(2)-Au(15)  | 85.5  |
| Au(4)-Au(2)-Au(16)  | 122.1 |
| Au(4)-Au(2)-Au(35)  | 116.5 |
| Au(4)-Au(2)-Au(36)  | 57.8  |
| Au(5)-Au(2)-Au(15)  | 111.5 |
| Au(5)-Au(2)-Au(35)  | 111.9 |
| Au(6)-Au(2)-Au(5)   | 57.6  |
| Au(6)-Au(2)-Au(15)  | 53.9  |
| Au(6)-Au(2)-Au(35)  | 169.5 |
| Au(7)-Au(2)-Au(5)   | 57.6  |
| Au(7)-Au(2)-Au(6)   | 115.2 |
| Au(7)-Au(2)-Au(15)  | 169.2 |
| Au(7)-Au(2)-Au(35)  | 54.3  |
| Au(15)-Au(2)-Au(35) | 136.5 |
| Au(16)-Au(2)-Au(5)  | 89.3  |
| Au(16)-Au(2)-Au(6)  | 62.6  |
| Au(16)-Au(2)-Au(7)  | 116.4 |
| Au(16)-Au(2)-Au(15) | 60.2  |
| Au(16)-Au(2)-Au(35) | 120.5 |
| Au(16)-Au(2)-Au(36) | 178.4 |
| Au(17)-Au(2)-Au(1)  | 57.8  |
| Au(17)-Au(2)-Au(3)  | 122.7 |
| Au(17)-Au(2)-Au(4)  | 178.9 |
| Au(17)-Au(2)-Au(5)  | 119.0 |
| Au(17)-Au(2)-Au(6)  | 120.5 |
| Au(17)-Au(2)-Au(7)  | 90.4  |
| Au(17)-Au(2)-Au(15) | 95.4  |
| Au(17)-Au(2)-Au(16) | 58.0  |
| Au(17)-Au(2)-Au(35) | 63.2  |

|                     |       |
|---------------------|-------|
| Au(17)-Au(2)-Au(36) | 122.1 |
| Au(36)-Au(2)-Au(5)  | 89.3  |
| Au(36)-Au(2)-Au(6)  | 117.3 |
| Au(36)-Au(2)-Au(7)  | 62.1  |
| Au(36)-Au(2)-Au(15) | 121.2 |
| Au(36)-Au(2)-Au(35) | 59.3  |
| Au(2)-Au(3)-Au(15)  | 61.4  |
| Au(2)-Au(3)-Au(26)  | 91.5  |
| Au(2)-Au(3)-Au(37)  | 84.7  |
| Au(2)-Au(3)-Au(38)  | 139.9 |
| Au(4)-Au(3)-Au(2)   | 61.9  |
| Au(4)-Au(3)-Au(15)  | 85.8  |
| Au(4)-Au(3)-Au(26)  | 60.7  |
| Au(4)-Au(3)-Au(37)  | 138.0 |
| Au(4)-Au(3)-Au(38)  | 78.2  |
| Au(26)-Au(3)-Au(15) | 53.4  |
| Au(26)-Au(3)-Au(37) | 150.9 |
| Au(26)-Au(3)-Au(38) | 64.1  |
| Au(36)-Au(3)-Au(2)  | 62.4  |
| Au(36)-Au(3)-Au(4)  | 60.5  |
| Au(36)-Au(3)-Au(15) | 123.1 |
| Au(36)-Au(3)-Au(26) | 121.1 |
| Au(36)-Au(3)-Au(37) | 82.4  |
| Au(36)-Au(3)-Au(38) | 102.0 |
| Au(37)-Au(3)-Au(15) | 100.5 |
| Au(38)-Au(3)-Au(15) | 115.0 |
| Au(38)-Au(3)-Au(37) | 132.1 |
| S(21)-Au(3)-Au(2)   | 127.0 |
| S(21)-Au(3)-Au(4)   | 171.0 |
| S(21)-Au(3)-Au(15)  | 99.9  |

|                     |       |
|---------------------|-------|
| S(21)-Au(3)-Au(26)  | 117.3 |
| S(21)-Au(3)-Au(36)  | 120.5 |
| S(21)-Au(3)-Au(37)  | 48.2  |
| S(21)-Au(3)-Au(38)  | 93.0  |
| Au(2)-Au(4)-Au(5)   | 62.2  |
| Au(2)-Au(4)-Au(6)   | 62.2  |
| Au(2)-Au(4)-Au(26)  | 91.7  |
| Au(2)-Au(4)-Au(28)  | 123.5 |
| Au(2)-Au(4)-Au(29)  | 89.5  |
| Au(2)-Au(4)-Au(39)  | 120.9 |
| Au(3)-Au(4)-Au(2)   | 59.8  |
| Au(3)-Au(4)-Au(5)   | 122.1 |
| Au(3)-Au(4)-Au(6)   | 93.4  |
| Au(3)-Au(4)-Au(26)  | 63.0  |
| Au(3)-Au(4)-Au(28)  | 89.7  |
| Au(3)-Au(4)-Au(29)  | 120.2 |
| Au(3)-Au(4)-Au(36)  | 59.4  |
| Au(3)-Au(4)-Au(39)  | 121.1 |
| Au(5)-Au(4)-Au(28)  | 122.7 |
| Au(5)-Au(4)-Au(29)  | 58.1  |
| Au(6)-Au(4)-Au(5)   | 59.1  |
| Au(6)-Au(4)-Au(28)  | 174.3 |
| Au(6)-Au(4)-Au(29)  | 117.2 |
| Au(23)-Au(4)-Au(2)  | 128.5 |
| Au(23)-Au(4)-Au(3)  | 171.6 |
| Au(23)-Au(4)-Au(5)  | 66.3  |
| Au(23)-Au(4)-Au(6)  | 92.4  |
| Au(23)-Au(4)-Au(26) | 115.1 |
| Au(23)-Au(4)-Au(28) | 84.0  |
| Au(23)-Au(4)-Au(29) | 61.8  |

|                     |       |
|---------------------|-------|
| Au(23)-Au(4)-Au(36) | 121.5 |
| Au(23)-Au(4)-Au(39) | 57.6  |
| Au(24)-Au(4)-Au(2)  | 167.3 |
| Au(24)-Au(4)-Au(3)  | 109.1 |
| Au(24)-Au(4)-Au(5)  | 128.5 |
| Au(24)-Au(4)-Au(6)  | 115.3 |
| Au(24)-Au(4)-Au(23) | 62.9  |
| Au(24)-Au(4)-Au(26) | 76.9  |
| Au(24)-Au(4)-Au(28) | 59.1  |
| Au(24)-Au(4)-Au(29) | 102.2 |
| Au(24)-Au(4)-Au(36) | 120.1 |
| Au(24)-Au(4)-Au(39) | 57.7  |
| Au(26)-Au(4)-Au(5)  | 119.9 |
| Au(26)-Au(4)-Au(6)  | 60.8  |
| Au(26)-Au(4)-Au(28) | 116.8 |
| Au(26)-Au(4)-Au(29) | 176.7 |
| Au(26)-Au(4)-Au(39) | 58.2  |
| Au(29)-Au(4)-Au(28) | 64.8  |
| Au(36)-Au(4)-Au(2)  | 61.3  |
| Au(36)-Au(4)-Au(5)  | 92.6  |
| Au(36)-Au(4)-Au(6)  | 123.5 |
| Au(36)-Au(4)-Au(26) | 122.3 |
| Au(36)-Au(4)-Au(28) | 62.2  |
| Au(36)-Au(4)-Au(29) | 60.9  |
| Au(36)-Au(4)-Au(39) | 177.8 |
| Au(39)-Au(4)-Au(5)  | 88.8  |
| Au(39)-Au(4)-Au(6)  | 58.7  |
| Au(39)-Au(4)-Au(28) | 115.6 |
| Au(39)-Au(4)-Au(29) | 118.6 |
| Au(1)-Au(5)-Au(2)   | 57.2  |

|                    |       |
|--------------------|-------|
| Au(1)-Au(5)-Au(9)  | 52.9  |
| Au(1)-Au(5)-Au(23) | 169.1 |
| Au(2)-Au(5)-Au(9)  | 110.1 |
| Au(2)-Au(5)-Au(23) | 112.0 |
| Au(4)-Au(5)-Au(1)  | 115.0 |
| Au(4)-Au(5)-Au(2)  | 57.8  |
| Au(4)-Au(5)-Au(9)  | 167.9 |
| Au(4)-Au(5)-Au(23) | 54.2  |
| Au(6)-Au(5)-Au(1)  | 89.3  |
| Au(6)-Au(5)-Au(2)  | 60.9  |
| Au(6)-Au(5)-Au(4)  | 59.9  |
| Au(6)-Au(5)-Au(9)  | 116.5 |
| Au(6)-Au(5)-Au(23) | 86.0  |
| Au(6)-Au(5)-Au(29) | 122.3 |
| Au(7)-Au(5)-Au(1)  | 58.6  |
| Au(7)-Au(5)-Au(2)  | 60.5  |
| Au(7)-Au(5)-Au(4)  | 89.0  |
| Au(7)-Au(5)-Au(6)  | 121.4 |
| Au(7)-Au(5)-Au(9)  | 83.5  |
| Au(7)-Au(5)-Au(23) | 116.2 |
| Au(7)-Au(5)-Au(29) | 57.5  |
| Au(8)-Au(5)-Au(1)  | 89.9  |
| Au(8)-Au(5)-Au(2)  | 118.3 |
| Au(8)-Au(5)-Au(4)  | 120.1 |
| Au(8)-Au(5)-Au(6)  | 179.2 |
| Au(8)-Au(5)-Au(7)  | 57.8  |
| Au(8)-Au(5)-Au(9)  | 63.3  |
| Au(8)-Au(5)-Au(12) | 122.3 |
| Au(8)-Au(5)-Au(23) | 94.7  |
| Au(8)-Au(5)-Au(29) | 57.8  |

|                     |       |
|---------------------|-------|
| Au(9)-Au(5)-Au(23)  | 137.8 |
| Au(12)-Au(5)-Au(1)  | 62.6  |
| Au(12)-Au(5)-Au(2)  | 89.3  |
| Au(12)-Au(5)-Au(4)  | 117.5 |
| Au(12)-Au(5)-Au(6)  | 57.6  |
| Au(12)-Au(5)-Au(7)  | 121.2 |
| Au(12)-Au(5)-Au(9)  | 59.7  |
| Au(12)-Au(5)-Au(23) | 122.0 |
| Au(12)-Au(5)-Au(29) | 178.5 |
| Au(22)-Au(5)-Au(1)  | 120.8 |
| Au(22)-Au(5)-Au(2)  | 119.3 |
| Au(22)-Au(5)-Au(4)  | 91.4  |
| Au(22)-Au(5)-Au(6)  | 58.4  |
| Au(22)-Au(5)-Au(7)  | 179.3 |
| Au(22)-Au(5)-Au(8)  | 122.3 |
| Au(22)-Au(5)-Au(9)  | 96.0  |
| Au(22)-Au(5)-Au(12) | 58.2  |
| Au(22)-Au(5)-Au(23) | 64.5  |
| Au(22)-Au(5)-Au(29) | 123.2 |
| Au(29)-Au(5)-Au(1)  | 116.0 |
| Au(29)-Au(5)-Au(2)  | 89.4  |
| Au(29)-Au(5)-Au(4)  | 62.3  |
| Au(29)-Au(5)-Au(9)  | 120.1 |
| Au(29)-Au(5)-Au(23) | 59.3  |
| Au(2)-Au(6)-Au(13)  | 121.0 |
| Au(2)-Au(6)-Au(16)  | 56.9  |
| Au(4)-Au(6)-Au(2)   | 58.3  |
| Au(4)-Au(6)-Au(13)  | 174.4 |
| Au(4)-Au(6)-Au(16)  | 115.2 |
| Au(4)-Au(6)-Au(26)  | 59.4  |

|                     |       |
|---------------------|-------|
| Au(5)-Au(6)-Au(2)   | 61.5  |
| Au(5)-Au(6)-Au(4)   | 60.9  |
| Au(5)-Au(6)-Au(13)  | 124.2 |
| Au(5)-Au(6)-Au(16)  | 88.3  |
| Au(5)-Au(6)-Au(26)  | 120.3 |
| Au(12)-Au(6)-Au(2)  | 91.4  |
| Au(12)-Au(6)-Au(4)  | 121.5 |
| Au(12)-Au(6)-Au(5)  | 60.7  |
| Au(12)-Au(6)-Au(13) | 63.5  |
| Au(12)-Au(6)-Au(16) | 60.7  |
| Au(12)-Au(6)-Au(22) | 59.5  |
| Au(12)-Au(6)-Au(26) | 178.8 |
| Au(12)-Au(6)-Au(39) | 122.6 |
| Au(14)-Au(6)-Au(2)  | 126.2 |
| Au(14)-Au(6)-Au(4)  | 116.4 |
| Au(14)-Au(6)-Au(5)  | 170.3 |
| Au(14)-Au(6)-Au(12) | 121.6 |
| Au(14)-Au(6)-Au(13) | 59.0  |
| Au(14)-Au(6)-Au(16) | 101.0 |
| Au(14)-Au(6)-Au(22) | 112.9 |
| Au(14)-Au(6)-Au(26) | 57.6  |
| Au(14)-Au(6)-Au(39) | 80.0  |
| Au(15)-Au(6)-Au(2)  | 63.9  |
| Au(15)-Au(6)-Au(4)  | 90.6  |
| Au(15)-Au(6)-Au(5)  | 125.4 |
| Au(15)-Au(6)-Au(12) | 121.5 |
| Au(15)-Au(6)-Au(13) | 84.4  |
| Au(15)-Au(6)-Au(14) | 62.6  |
| Au(15)-Au(6)-Au(16) | 61.5  |
| Au(15)-Au(6)-Au(22) | 175.4 |

|                     |       |
|---------------------|-------|
| Au(15)-Au(6)-Au(26) | 57.5  |
| Au(15)-Au(6)-Au(39) | 115.6 |
| Au(16)-Au(6)-Au(13) | 64.3  |
| Au(22)-Au(6)-Au(2)  | 120.6 |
| Au(22)-Au(6)-Au(4)  | 92.4  |
| Au(22)-Au(6)-Au(5)  | 59.1  |
| Au(22)-Au(6)-Au(13) | 92.5  |
| Au(22)-Au(6)-Au(16) | 120.0 |
| Au(22)-Au(6)-Au(26) | 121.5 |
| Au(22)-Au(6)-Au(39) | 63.2  |
| Au(26)-Au(6)-Au(2)  | 88.6  |
| Au(26)-Au(6)-Au(13) | 115.5 |
| Au(26)-Au(6)-Au(16) | 118.4 |
| Au(39)-Au(6)-Au(2)  | 118.9 |
| Au(39)-Au(6)-Au(4)  | 60.6  |
| Au(39)-Au(6)-Au(5)  | 90.9  |
| Au(39)-Au(6)-Au(13) | 119.6 |
| Au(39)-Au(6)-Au(16) | 175.4 |
| Au(39)-Au(6)-Au(26) | 58.3  |
| Au(1)-Au(7)-Au(2)   | 58.9  |
| Au(1)-Au(7)-Au(5)   | 62.8  |
| Au(1)-Au(7)-Au(30)  | 174.7 |
| Au(1)-Au(7)-Au(33)  | 61.8  |
| Au(1)-Au(7)-Au(34)  | 59.6  |
| Au(1)-Au(7)-Au(36)  | 116.5 |
| Au(2)-Au(7)-Au(30)  | 123.0 |
| Au(2)-Au(7)-Au(34)  | 89.6  |
| Au(2)-Au(7)-Au(36)  | 57.6  |
| Au(5)-Au(7)-Au(2)   | 61.8  |
| Au(5)-Au(7)-Au(30)  | 122.5 |



|                     |       |
|---------------------|-------|
| Au(5)-Au(7)-Au(33)  | 93.8  |
| Au(5)-Au(7)-Au(34)  | 122.4 |
| Au(5)-Au(7)-Au(36)  | 89.1  |
| Au(8)-Au(7)-Au(1)   | 93.6  |
| Au(8)-Au(7)-Au(2)   | 121.5 |
| Au(8)-Au(7)-Au(5)   | 59.6  |
| Au(8)-Au(7)-Au(29)  | 59.8  |
| Au(8)-Au(7)-Au(30)  | 89.3  |
| Au(8)-Au(7)-Au(33)  | 64.3  |
| Au(8)-Au(7)-Au(34)  | 121.6 |
| Au(8)-Au(7)-Au(35)  | 174.1 |
| Au(8)-Au(7)-Au(36)  | 120.6 |
| Au(29)-Au(7)-Au(1)  | 124.3 |
| Au(29)-Au(7)-Au(2)  | 92.5  |
| Au(29)-Au(7)-Au(5)  | 61.6  |
| Au(29)-Au(7)-Au(30) | 61.0  |
| Au(29)-Au(7)-Au(33) | 124.0 |
| Au(29)-Au(7)-Au(34) | 176.1 |
| Au(29)-Au(7)-Au(36) | 61.0  |
| Au(31)-Au(7)-Au(1)  | 116.7 |
| Au(31)-Au(7)-Au(2)  | 128.3 |
| Au(31)-Au(7)-Au(5)  | 168.9 |
| Au(31)-Au(7)-Au(8)  | 110.1 |
| Au(31)-Au(7)-Au(29) | 118.3 |
| Au(31)-Au(7)-Au(30) | 58.1  |
| Au(31)-Au(7)-Au(33) | 77.1  |
| Au(31)-Au(7)-Au(34) | 57.9  |
| Au(31)-Au(7)-Au(35) | 64.1  |
| Au(31)-Au(7)-Au(36) | 100.4 |
| Au(33)-Au(7)-Au(2)  | 120.6 |

|                     |       |
|---------------------|-------|
| Au(33)-Au(7)-Au(30) | 115.9 |
| Au(33)-Au(7)-Au(34) | 57.3  |
| Au(33)-Au(7)-Au(36) | 175.0 |
| Au(34)-Au(7)-Au(30) | 115.1 |
| Au(34)-Au(7)-Au(36) | 117.8 |
| Au(35)-Au(7)-Au(1)  | 90.3  |
| Au(35)-Au(7)-Au(2)  | 64.4  |
| Au(35)-Au(7)-Au(5)  | 126.3 |
| Au(35)-Au(7)-Au(29) | 121.2 |
| Au(35)-Au(7)-Au(30) | 86.5  |
| Au(35)-Au(7)-Au(33) | 113.9 |
| Au(35)-Au(7)-Au(34) | 57.0  |
| Au(35)-Au(7)-Au(36) | 61.1  |
| Au(36)-Au(7)-Au(30) | 65.4  |
| Au(5)-Au(8)-Au(9)   | 63.2  |
| Au(5)-Au(8)-Au(11)  | 81.1  |
| Au(5)-Au(8)-Au(32)  | 141.6 |
| Au(5)-Au(8)-Au(33)  | 93.0  |
| Au(7)-Au(8)-Au(5)   | 62.6  |
| Au(7)-Au(8)-Au(9)   | 85.7  |
| Au(7)-Au(8)-Au(11)  | 137.9 |
| Au(7)-Au(8)-Au(29)  | 60.7  |
| Au(7)-Au(8)-Au(32)  | 79.1  |
| Au(7)-Au(8)-Au(33)  | 60.0  |
| Au(11)-Au(8)-Au(9)  | 96.8  |
| Au(29)-Au(8)-Au(5)  | 62.9  |
| Au(29)-Au(8)-Au(9)  | 125.0 |
| Au(29)-Au(8)-Au(11) | 84.9  |
| Au(29)-Au(8)-Au(32) | 101.5 |
| Au(29)-Au(8)-Au(33) | 120.6 |

|                     |       |
|---------------------|-------|
| Au(32)-Au(8)-Au(9)  | 114.0 |
| Au(32)-Au(8)-Au(11) | 134.9 |
| Au(32)-Au(8)-Au(33) | 63.7  |
| Au(33)-Au(8)-Au(9)  | 53.4  |
| Au(33)-Au(8)-Au(11) | 147.9 |
| S(3)-Au(8)-Au(5)    | 125.0 |
| S(3)-Au(8)-Au(7)    | 172.3 |
| S(3)-Au(8)-Au(9)    | 97.1  |
| S(3)-Au(8)-Au(11)   | 49.0  |
| S(3)-Au(8)-Au(29)   | 122.2 |
| S(3)-Au(8)-Au(32)   | 93.2  |
| S(3)-Au(8)-Au(33)   | 116.2 |
| Au(1)-Au(9)-Au(5)   | 61.4  |
| Au(1)-Au(9)-Au(8)   | 89.0  |
| Au(1)-Au(9)-Au(10)  | 130.9 |
| Au(1)-Au(9)-Au(12)  | 64.5  |
| Au(1)-Au(9)-Au(20)  | 58.3  |
| Au(1)-Au(9)-Au(33)  | 65.4  |
| Au(5)-Au(9)-Au(8)   | 53.5  |
| Au(5)-Au(9)-Au(10)  | 75.1  |
| Au(8)-Au(9)-Au(10)  | 82.4  |
| Au(12)-Au(9)-Au(5)  | 56.0  |
| Au(12)-Au(9)-Au(8)  | 109.0 |
| Au(12)-Au(9)-Au(10) | 73.0  |
| Au(20)-Au(9)-Au(5)  | 119.4 |
| Au(20)-Au(9)-Au(8)  | 118.9 |
| Au(20)-Au(9)-Au(10) | 158.4 |
| Au(20)-Au(9)-Au(12) | 100.9 |
| Au(33)-Au(9)-Au(5)  | 91.7  |
| Au(33)-Au(9)-Au(8)  | 61.1  |

|                      |       |
|----------------------|-------|
| Au(33)-Au(9)-Au(10)  | 141.1 |
| Au(33)-Au(9)-Au(12)  | 129.0 |
| Au(33)-Au(9)-Au(20)  | 58.6  |
| S(4)-Au(9)-Au(1)     | 173.5 |
| S(4)-Au(9)-Au(5)     | 114.8 |
| S(4)-Au(9)-Au(8)     | 92.6  |
| S(4)-Au(9)-Au(10)    | 43.3  |
| S(4)-Au(9)-Au(12)    | 109.1 |
| S(4)-Au(9)-Au(20)    | 125.8 |
| S(4)-Au(9)-Au(33)    | 120.8 |
| Au(11)-Au(10)-Au(9)  | 91.0  |
| Au(11)-Au(10)-Au(22) | 82.3  |
| Au(22)-Au(10)-Au(9)  | 85.9  |
| S(1)-Au(10)-Au(9)    | 136.3 |
| S(1)-Au(10)-Au(11)   | 87.6  |
| S(1)-Au(10)-Au(22)   | 50.6  |
| S(1)-Au(10)-S(4)     | 172.7 |
| S(4)-Au(10)-Au(9)    | 44.9  |
| S(4)-Au(10)-Au(11)   | 99.7  |
| S(4)-Au(10)-Au(22)   | 130.7 |
| Au(8)-Au(11)-Au(10)  | 89.8  |
| Au(8)-Au(11)-Au(23)  | 86.8  |
| Au(10)-Au(11)-Au(23) | 99.2  |
| S(2)-Au(11)-Au(8)    | 132.3 |
| S(2)-Au(11)-Au(10)   | 101.4 |
| S(2)-Au(11)-Au(23)   | 45.8  |
| S(2)-Au(11)-S(3)     | 165.7 |
| S(3)-Au(11)-Au(8)    | 51.6  |
| S(3)-Au(11)-Au(10)   | 92.0  |
| S(3)-Au(11)-Au(23)   | 137.0 |

|                      |       |
|----------------------|-------|
| Au(1)-Au(12)-Au(13)  | 120.7 |
| Au(1)-Au(12)-Au(21)  | 60.0  |
| Au(5)-Au(12)-Au(1)   | 60.9  |
| Au(5)-Au(12)-Au(9)   | 64.3  |
| Au(5)-Au(12)-Au(13)  | 126.4 |
| Au(5)-Au(12)-Au(16)  | 90.8  |
| Au(5)-Au(12)-Au(21)  | 120.7 |
| Au(6)-Au(12)-Au(1)   | 90.6  |
| Au(6)-Au(12)-Au(5)   | 61.7  |
| Au(6)-Au(12)-Au(9)   | 125.0 |
| Au(6)-Au(12)-Au(13)  | 64.7  |
| Au(6)-Au(12)-Au(16)  | 64.3  |
| Au(6)-Au(12)-Au(21)  | 122.7 |
| Au(9)-Au(12)-Au(1)   | 53.7  |
| Au(9)-Au(12)-Au(13)  | 166.0 |
| Au(9)-Au(12)-Au(21)  | 77.9  |
| Au(13)-Au(12)-Au(21) | 88.3  |
| Au(16)-Au(12)-Au(1)  | 54.9  |
| Au(16)-Au(12)-Au(9)  | 107.7 |
| Au(16)-Au(12)-Au(13) | 65.9  |
| Au(16)-Au(12)-Au(21) | 58.5  |
| Au(22)-Au(12)-Au(1)  | 120.6 |
| Au(22)-Au(12)-Au(5)  | 59.8  |
| Au(22)-Au(12)-Au(6)  | 60.4  |
| Au(22)-Au(12)-Au(9)  | 100.1 |
| Au(22)-Au(12)-Au(13) | 93.7  |
| Au(22)-Au(12)-Au(16) | 124.5 |
| Au(22)-Au(12)-Au(21) | 176.9 |
| S(16)-Au(12)-Au(1)   | 93.6  |
| S(16)-Au(12)-Au(5)   | 139.9 |

|                      |       |
|----------------------|-------|
| S(16)-Au(12)-Au(6)   | 155.5 |
| S(16)-Au(12)-Au(9)   | 75.7  |
| S(16)-Au(12)-Au(13)  | 92.6  |
| S(16)-Au(12)-Au(16)  | 98.8  |
| S(16)-Au(12)-Au(21)  | 42.8  |
| S(16)-Au(12)-Au(22)  | 134.6 |
| Au(6)-Au(13)-Au(16)  | 55.7  |
| Au(12)-Au(13)-Au(6)  | 51.8  |
| Au(12)-Au(13)-Au(16) | 54.1  |
| Au(14)-Au(13)-Au(6)  | 52.8  |
| Au(14)-Au(13)-Au(12) | 103.9 |
| Au(14)-Au(13)-Au(16) | 90.7  |
| S(5)-Au(13)-Au(6)    | 100.5 |
| S(5)-Au(13)-Au(12)   | 91.8  |
| S(5)-Au(13)-Au(14)   | 92.5  |
| S(5)-Au(13)-Au(16)   | 145.4 |
| S(17)-Au(13)-Au(6)   | 91.9  |
| S(17)-Au(13)-Au(12)  | 97.4  |
| S(17)-Au(13)-Au(14)  | 93.5  |
| S(17)-Au(13)-Au(16)  | 45.5  |
| S(17)-Au(13)-S(5)    | 167.5 |
| Au(6)-Au(14)-Au(13)  | 68.2  |
| Au(6)-Au(14)-Au(15)  | 58.6  |
| Au(6)-Au(14)-Au(26)  | 65.0  |
| Au(6)-Au(14)-Au(27)  | 74.3  |
| Au(6)-Au(14)-Au(42)  | 127.0 |
| Au(13)-Au(14)-Au(27) | 70.7  |
| Au(13)-Au(14)-Au(42) | 138.3 |
| Au(15)-Au(14)-Au(13) | 87.2  |
| Au(15)-Au(14)-Au(27) | 132.7 |

|                      |       |
|----------------------|-------|
| Au(15)-Au(14)-Au(42) | 134.5 |
| Au(26)-Au(14)-Au(13) | 131.7 |
| Au(26)-Au(14)-Au(15) | 58.7  |
| Au(26)-Au(14)-Au(27) | 106.5 |
| Au(26)-Au(14)-Au(42) | 82.2  |
| Au(27)-Au(14)-Au(42) | 77.0  |
| S(7)-Au(14)-Au(6)    | 160.8 |
| S(7)-Au(14)-Au(13)   | 107.0 |
| S(7)-Au(14)-Au(15)   | 140.5 |
| S(7)-Au(14)-Au(26)   | 121.1 |
| S(7)-Au(14)-Au(27)   | 86.6  |
| S(7)-Au(14)-Au(42)   | 44.3  |
| Au(2)-Au(15)-Au(3)   | 54.5  |
| Au(2)-Au(15)-Au(18)  | 73.7  |
| Au(3)-Au(15)-Au(18)  | 78.7  |
| Au(6)-Au(15)-Au(2)   | 62.1  |
| Au(6)-Au(15)-Au(3)   | 89.8  |
| Au(6)-Au(15)-Au(14)  | 58.7  |
| Au(6)-Au(15)-Au(16)  | 64.5  |
| Au(6)-Au(15)-Au(18)  | 132.0 |
| Au(6)-Au(15)-Au(26)  | 65.1  |
| Au(14)-Au(15)-Au(2)  | 120.5 |
| Au(14)-Au(15)-Au(3)  | 118.8 |
| Au(14)-Au(15)-Au(16) | 100.5 |
| Au(14)-Au(15)-Au(18) | 161.4 |
| Au(16)-Au(15)-Au(2)  | 57.3  |
| Au(16)-Au(15)-Au(3)  | 111.3 |
| Au(16)-Au(15)-Au(18) | 76.6  |
| Au(26)-Au(15)-Au(2)  | 91.6  |
| Au(26)-Au(15)-Au(3)  | 60.5  |

|                      |       |
|----------------------|-------|
| Au(26)-Au(15)-Au(14) | 58.8  |
| Au(26)-Au(15)-Au(16) | 128.9 |
| Au(26)-Au(15)-Au(18) | 136.9 |
| S(18)-Au(15)-Au(2)   | 113.8 |
| S(18)-Au(15)-Au(3)   | 88.4  |
| S(18)-Au(15)-Au(6)   | 175.8 |
| S(18)-Au(15)-Au(14)  | 125.4 |
| S(18)-Au(15)-Au(16)  | 112.7 |
| S(18)-Au(15)-Au(18)  | 43.9  |
| S(18)-Au(15)-Au(26)  | 117.1 |
| Au(1)-Au(16)-Au(2)   | 61.2  |
| Au(1)-Au(16)-Au(6)   | 90.6  |
| Au(1)-Au(16)-Au(12)  | 64.4  |
| Au(1)-Au(16)-Au(13)  | 124.4 |
| Au(1)-Au(16)-Au(15)  | 123.1 |
| Au(1)-Au(16)-Au(21)  | 66.3  |
| Au(2)-Au(16)-Au(6)   | 60.5  |
| Au(2)-Au(16)-Au(12)  | 90.1  |
| Au(2)-Au(16)-Au(13)  | 120.1 |
| Au(2)-Au(16)-Au(15)  | 62.6  |
| Au(2)-Au(16)-Au(21)  | 127.4 |
| Au(6)-Au(16)-Au(13)  | 59.9  |
| Au(6)-Au(16)-Au(21)  | 122.5 |
| Au(12)-Au(16)-Au(6)  | 55.0  |
| Au(12)-Au(16)-Au(13) | 60.1  |
| Au(12)-Au(16)-Au(15) | 108.5 |
| Au(12)-Au(16)-Au(21) | 67.6  |
| Au(15)-Au(16)-Au(6)  | 54.0  |
| Au(15)-Au(16)-Au(13) | 78.5  |
| Au(15)-Au(16)-Au(21) | 168.1 |



|                      |       |
|----------------------|-------|
| Au(17)-Au(16)-Au(1)  | 59.7  |
| Au(17)-Au(16)-Au(2)  | 59.8  |
| Au(17)-Au(16)-Au(6)  | 120.3 |
| Au(17)-Au(16)-Au(12) | 123.9 |
| Au(17)-Au(16)-Au(13) | 175.8 |
| Au(17)-Au(16)-Au(15) | 98.2  |
| Au(17)-Au(16)-Au(21) | 93.1  |
| Au(21)-Au(16)-Au(13) | 90.0  |
| S(17)-Au(16)-Au(1)   | 158.5 |
| S(17)-Au(16)-Au(2)   | 138.5 |
| S(17)-Au(16)-Au(6)   | 94.6  |
| S(17)-Au(16)-Au(12)  | 102.1 |
| S(17)-Au(16)-Au(13)  | 44.4  |
| S(17)-Au(16)-Au(15)  | 76.0  |
| S(17)-Au(16)-Au(17)  | 132.4 |
| S(17)-Au(16)-Au(21)  | 93.6  |
| Au(1)-Au(17)-Au(2)   | 62.2  |
| Au(1)-Au(17)-Au(16)  | 60.3  |
| Au(1)-Au(17)-Au(18)  | 137.2 |
| Au(1)-Au(17)-Au(19)  | 78.5  |
| Au(1)-Au(17)-Au(34)  | 60.9  |
| Au(1)-Au(17)-Au(35)  | 86.1  |
| Au(2)-Au(17)-Au(18)  | 81.1  |
| Au(2)-Au(17)-Au(19)  | 140.6 |
| Au(2)-Au(17)-Au(34)  | 92.6  |
| Au(2)-Au(17)-Au(35)  | 62.1  |
| Au(16)-Au(17)-Au(2)  | 62.2  |
| Au(16)-Au(17)-Au(18) | 84.3  |
| Au(16)-Au(17)-Au(19) | 101.4 |
| Au(16)-Au(17)-Au(34) | 121.1 |

|                      |       |
|----------------------|-------|
| Au(16)-Au(17)-Au(35) | 123.5 |
| Au(18)-Au(17)-Au(35) | 96.0  |
| Au(19)-Au(17)-Au(18) | 135.6 |
| Au(19)-Au(17)-Au(35) | 115.5 |
| Au(34)-Au(17)-Au(18) | 147.2 |
| Au(34)-Au(17)-Au(19) | 64.3  |
| Au(34)-Au(17)-Au(35) | 53.7  |
| S(23)-Au(17)-Au(1)   | 172.1 |
| S(23)-Au(17)-Au(2)   | 125.7 |
| S(23)-Au(17)-Au(16)  | 121.9 |
| S(23)-Au(17)-Au(18)  | 49.5  |
| S(23)-Au(17)-Au(19)  | 93.6  |
| S(23)-Au(17)-Au(34)  | 116.0 |
| S(23)-Au(17)-Au(35)  | 97.8  |
| Au(17)-Au(18)-Au(15) | 86.1  |
| Au(37)-Au(18)-Au(15) | 96.8  |
| Au(37)-Au(18)-Au(17) | 89.6  |
| S(18)-Au(18)-Au(15)  | 46.5  |
| S(18)-Au(18)-Au(17)  | 132.0 |
| S(18)-Au(18)-Au(37)  | 101.7 |
| S(18)-Au(18)-S(23)   | 165.1 |
| S(23)-Au(18)-Au(15)  | 135.9 |
| S(23)-Au(18)-Au(17)  | 50.9  |
| S(23)-Au(18)-Au(37)  | 92.7  |
| Au(17)-Au(19)-Au(20) | 94.0  |
| Au(17)-Au(19)-Au(34) | 57.2  |
| Au(20)-Au(19)-Au(34) | 67.8  |
| S(24)-Au(19)-Au(17)  | 93.8  |
| S(24)-Au(19)-Au(20)  | 87.9  |
| S(24)-Au(19)-Au(34)  | 138.6 |

|                      |       |
|----------------------|-------|
| S(24)-Au(19)-S(25)   | 172.7 |
| S(25)-Au(19)-Au(17)  | 93.5  |
| S(25)-Au(19)-Au(20)  | 92.8  |
| S(25)-Au(19)-Au(34)  | 47.7  |
| Au(1)-Au(20)-Au(9)   | 58.4  |
| Au(1)-Au(20)-Au(19)  | 77.8  |
| Au(1)-Au(20)-Au(21)  | 69.1  |
| Au(1)-Au(20)-Au(33)  | 65.5  |
| Au(1)-Au(20)-Au(41)  | 127.8 |
| Au(9)-Au(20)-Au(19)  | 135.9 |
| Au(9)-Au(20)-Au(21)  | 86.9  |
| Au(9)-Au(20)-Au(41)  | 125.1 |
| Au(19)-Au(20)-Au(41) | 84.2  |
| Au(21)-Au(20)-Au(19) | 72.3  |
| Au(21)-Au(20)-Au(41) | 147.8 |
| Au(33)-Au(20)-Au(9)  | 58.6  |
| Au(33)-Au(20)-Au(19) | 109.1 |
| Au(33)-Au(20)-Au(21) | 132.7 |
| Au(33)-Au(20)-Au(41) | 75.3  |
| S(15)-Au(20)-Au(1)   | 157.8 |
| S(15)-Au(20)-Au(9)   | 143.6 |
| S(15)-Au(20)-Au(19)  | 80.4  |
| S(15)-Au(20)-Au(21)  | 108.1 |
| S(15)-Au(20)-Au(33)  | 118.8 |
| S(15)-Au(20)-Au(41)  | 44.7  |
| Au(1)-Au(21)-Au(12)  | 54.9  |
| Au(16)-Au(21)-Au(1)  | 51.7  |
| Au(16)-Au(21)-Au(12) | 53.9  |
| Au(20)-Au(21)-Au(1)  | 51.9  |
| Au(20)-Au(21)-Au(12) | 90.3  |

|                      |       |
|----------------------|-------|
| Au(20)-Au(21)-Au(16) | 102.8 |
| S(16)-Au(21)-Au(1)   | 90.5  |
| S(16)-Au(21)-Au(12)  | 44.5  |
| S(16)-Au(21)-Au(16)  | 96.1  |
| S(16)-Au(21)-Au(20)  | 94.5  |
| S(16)-Au(21)-S(24)   | 169.1 |
| S(24)-Au(21)-Au(1)   | 100.3 |
| S(24)-Au(21)-Au(12)  | 145.2 |
| S(24)-Au(21)-Au(16)  | 92.1  |
| S(24)-Au(21)-Au(20)  | 90.8  |
| Au(5)-Au(22)-Au(10)  | 84.8  |
| Au(5)-Au(22)-Au(23)  | 62.7  |
| Au(5)-Au(22)-Au(27)  | 137.7 |
| Au(5)-Au(22)-Au(39)  | 90.8  |
| Au(6)-Au(22)-Au(5)   | 62.4  |
| Au(6)-Au(22)-Au(10)  | 137.5 |
| Au(6)-Au(22)-Au(23)  | 86.9  |
| Au(6)-Au(22)-Au(27)  | 75.4  |
| Au(6)-Au(22)-Au(39)  | 59.7  |
| Au(10)-Au(22)-Au(23) | 102.1 |
| Au(12)-Au(22)-Au(5)  | 62.1  |
| Au(12)-Au(22)-Au(6)  | 60.2  |
| Au(12)-Au(22)-Au(10) | 81.3  |
| Au(12)-Au(22)-Au(23) | 124.1 |
| Au(12)-Au(22)-Au(27) | 100.0 |
| Au(12)-Au(22)-Au(39) | 119.9 |
| Au(27)-Au(22)-Au(10) | 132.7 |
| Au(27)-Au(22)-Au(23) | 114.7 |
| Au(39)-Au(22)-Au(10) | 153.0 |
| Au(39)-Au(22)-Au(23) | 53.0  |

|                      |       |
|----------------------|-------|
| Au(39)-Au(22)-Au(27) | 64.2  |
| S(1)-Au(22)-Au(5)    | 127.2 |
| S(1)-Au(22)-Au(6)    | 170.0 |
| S(1)-Au(22)-Au(10)   | 48.2  |
| S(1)-Au(22)-Au(12)   | 119.7 |
| S(1)-Au(22)-Au(23)   | 100.2 |
| S(1)-Au(22)-Au(27)   | 95.1  |
| S(1)-Au(22)-Au(39)   | 119.3 |
| Au(4)-Au(23)-Au(5)   | 59.5  |
| Au(4)-Au(23)-Au(11)  | 128.1 |
| Au(4)-Au(23)-Au(22)  | 87.3  |
| Au(4)-Au(23)-Au(24)  | 57.9  |
| Au(4)-Au(23)-Au(29)  | 63.2  |
| Au(5)-Au(23)-Au(11)  | 71.8  |
| Au(5)-Au(23)-Au(22)  | 52.8  |
| Au(22)-Au(23)-Au(11) | 76.4  |
| Au(24)-Au(23)-Au(5)  | 117.0 |
| Au(24)-Au(23)-Au(11) | 166.6 |
| Au(24)-Au(23)-Au(22) | 116.9 |
| Au(24)-Au(23)-Au(29) | 99.9  |
| Au(29)-Au(23)-Au(5)  | 56.6  |
| Au(29)-Au(23)-Au(11) | 76.1  |
| Au(29)-Au(23)-Au(22) | 108.9 |
| Au(39)-Au(23)-Au(4)  | 63.9  |
| Au(39)-Au(23)-Au(5)  | 88.4  |
| Au(39)-Au(23)-Au(11) | 134.4 |
| Au(39)-Au(23)-Au(22) | 59.4  |
| Au(39)-Au(23)-Au(24) | 58.1  |
| Au(39)-Au(23)-Au(29) | 126.2 |
| S(2)-Au(23)-Au(4)    | 170.5 |

|                      |       |
|----------------------|-------|
| S(2)-Au(23)-Au(5)    | 111.1 |
| S(2)-Au(23)-Au(11)   | 44.1  |
| S(2)-Au(23)-Au(22)   | 85.2  |
| S(2)-Au(23)-Au(24)   | 131.1 |
| S(2)-Au(23)-Au(29)   | 113.9 |
| S(2)-Au(23)-Au(39)   | 116.5 |
| Au(4)-Au(24)-Au(23)  | 59.2  |
| Au(4)-Au(24)-Au(25)  | 129.4 |
| Au(4)-Au(24)-Au(28)  | 68.0  |
| Au(4)-Au(24)-Au(38)  | 78.1  |
| Au(23)-Au(24)-Au(25) | 125.9 |
| Au(23)-Au(24)-Au(28) | 86.7  |
| Au(23)-Au(24)-Au(38) | 137.0 |
| Au(28)-Au(24)-Au(25) | 147.1 |
| Au(28)-Au(24)-Au(38) | 71.5  |
| Au(38)-Au(24)-Au(25) | 84.4  |
| Au(39)-Au(24)-Au(4)  | 64.5  |
| Au(39)-Au(24)-Au(23) | 58.6  |
| Au(39)-Au(24)-Au(25) | 77.8  |
| Au(39)-Au(24)-Au(28) | 130.8 |
| Au(39)-Au(24)-Au(38) | 109.5 |
| S(9)-Au(24)-Au(4)    | 156.4 |
| S(9)-Au(24)-Au(23)   | 144.2 |
| S(9)-Au(24)-Au(25)   | 43.3  |
| S(9)-Au(24)-Au(28)   | 108.3 |
| S(9)-Au(24)-Au(38)   | 78.7  |
| S(9)-Au(24)-Au(39)   | 120.3 |
| S(8)-Au(25)-Au(24)   | 138.9 |
| S(9)-Au(25)-Au(24)   | 44.4  |
| S(9)-Au(25)-S(8)     | 175.4 |

|                      |       |
|----------------------|-------|
| Au(3)-Au(26)-Au(38)  | 58.9  |
| Au(4)-Au(26)-Au(3)   | 56.4  |
| Au(4)-Au(26)-Au(6)   | 59.7  |
| Au(4)-Au(26)-Au(38)  | 73.9  |
| Au(6)-Au(26)-Au(3)   | 88.9  |
| Au(6)-Au(26)-Au(38)  | 133.3 |
| Au(14)-Au(26)-Au(3)  | 128.1 |
| Au(14)-Au(26)-Au(4)  | 116.6 |
| Au(14)-Au(26)-Au(6)  | 57.4  |
| Au(14)-Au(26)-Au(38) | 169.2 |
| Au(14)-Au(26)-Au(39) | 80.5  |
| Au(15)-Au(26)-Au(3)  | 66.1  |
| Au(15)-Au(26)-Au(4)  | 90.7  |
| Au(15)-Au(26)-Au(6)  | 57.4  |
| Au(15)-Au(26)-Au(14) | 62.5  |
| Au(15)-Au(26)-Au(38) | 122.1 |
| Au(15)-Au(26)-Au(39) | 116.5 |
| Au(39)-Au(26)-Au(3)  | 117.4 |
| Au(39)-Au(26)-Au(4)  | 61.1  |
| Au(39)-Au(26)-Au(6)  | 59.3  |
| Au(39)-Au(26)-Au(38) | 103.9 |
| S(19)-Au(26)-Au(3)   | 94.7  |
| S(19)-Au(26)-Au(4)   | 119.2 |
| S(19)-Au(26)-Au(6)   | 174.6 |
| S(19)-Au(26)-Au(14)  | 122.4 |
| S(19)-Au(26)-Au(15)  | 127.9 |
| S(19)-Au(26)-Au(38)  | 46.8  |
| S(19)-Au(26)-Au(39)  | 115.4 |
| Au(14)-Au(27)-Au(39) | 69.9  |
| Au(22)-Au(27)-Au(14) | 97.3  |

|                      |       |
|----------------------|-------|
| Au(22)-Au(27)-Au(39) | 57.0  |
| S(5)-Au(27)-Au(14)   | 88.8  |
| S(5)-Au(27)-Au(22)   | 96.1  |
| S(5)-Au(27)-Au(39)   | 141.2 |
| S(6)-Au(27)-Au(14)   | 92.4  |
| S(6)-Au(27)-Au(22)   | 93.7  |
| S(6)-Au(27)-Au(39)   | 48.0  |
| S(6)-Au(27)-S(5)     | 169.9 |
| Au(4)-Au(28)-Au(29)  | 55.4  |
| Au(24)-Au(28)-Au(4)  | 52.9  |
| Au(24)-Au(28)-Au(29) | 91.2  |
| Au(24)-Au(28)-Au(36) | 104.8 |
| Au(36)-Au(28)-Au(4)  | 52.8  |
| Au(36)-Au(28)-Au(29) | 54.6  |
| S(10)-Au(28)-Au(4)   | 90.1  |
| S(10)-Au(28)-Au(24)  | 91.4  |
| S(10)-Au(28)-Au(29)  | 45.7  |
| S(10)-Au(28)-Au(36)  | 98.6  |
| S(10)-Au(28)-S(20)   | 166.0 |
| S(20)-Au(28)-Au(4)   | 102.9 |
| S(20)-Au(28)-Au(24)  | 92.3  |
| S(20)-Au(28)-Au(29)  | 147.7 |
| S(20)-Au(28)-Au(36)  | 93.6  |
| Au(4)-Au(29)-Au(28)  | 59.8  |
| Au(4)-Au(29)-Au(30)  | 124.0 |
| Au(5)-Au(29)-Au(4)   | 59.6  |
| Au(5)-Au(29)-Au(23)  | 64.2  |
| Au(5)-Au(29)-Au(28)  | 119.2 |
| Au(5)-Au(29)-Au(30)  | 128.2 |
| Au(5)-Au(29)-Au(36)  | 90.2  |



|                      |       |
|----------------------|-------|
| Au(7)-Au(29)-Au(4)   | 89.4  |
| Au(7)-Au(29)-Au(5)   | 61.0  |
| Au(7)-Au(29)-Au(23)  | 124.5 |
| Au(7)-Au(29)-Au(28)  | 122.4 |
| Au(7)-Au(29)-Au(30)  | 67.3  |
| Au(7)-Au(29)-Au(36)  | 63.6  |
| Au(8)-Au(29)-Au(4)   | 118.9 |
| Au(8)-Au(29)-Au(5)   | 59.4  |
| Au(8)-Au(29)-Au(7)   | 59.5  |
| Au(8)-Au(29)-Au(23)  | 99.0  |
| Au(8)-Au(29)-Au(28)  | 177.1 |
| Au(8)-Au(29)-Au(30)  | 92.7  |
| Au(8)-Au(29)-Au(36)  | 123.0 |
| Au(23)-Au(29)-Au(4)  | 54.9  |
| Au(23)-Au(29)-Au(28) | 78.2  |
| Au(23)-Au(29)-Au(30) | 166.7 |
| Au(30)-Au(29)-Au(28) | 90.1  |
| Au(36)-Au(29)-Au(4)  | 55.6  |
| Au(36)-Au(29)-Au(23) | 109.6 |
| Au(36)-Au(29)-Au(28) | 58.8  |
| Au(36)-Au(29)-Au(30) | 68.5  |
| S(10)-Au(29)-Au(4)   | 92.6  |
| S(10)-Au(29)-Au(5)   | 136.2 |
| S(10)-Au(29)-Au(7)   | 159.5 |
| S(10)-Au(29)-Au(8)   | 134.8 |
| S(10)-Au(29)-Au(23)  | 72.1  |
| S(10)-Au(29)-Au(28)  | 44.1  |
| S(10)-Au(29)-Au(30)  | 95.1  |
| S(10)-Au(29)-Au(36)  | 101.1 |
| Au(7)-Au(30)-Au(36)  | 53.9  |

|                      |       |
|----------------------|-------|
| Au(29)-Au(30)-Au(7)  | 51.8  |
| Au(29)-Au(30)-Au(36) | 53.8  |
| Au(31)-Au(30)-Au(7)  | 51.4  |
| Au(31)-Au(30)-Au(29) | 102.6 |
| Au(31)-Au(30)-Au(36) | 87.7  |
| S(11)-Au(30)-Au(7)   | 99.3  |
| S(11)-Au(30)-Au(29)  | 89.3  |
| S(11)-Au(30)-Au(31)  | 94.2  |
| S(11)-Au(30)-Au(36)  | 142.3 |
| S(11)-Au(30)-S(26)   | 172.0 |
| S(26)-Au(30)-Au(7)   | 88.7  |
| S(26)-Au(30)-Au(29)  | 96.2  |
| S(26)-Au(30)-Au(31)  | 90.2  |
| S(26)-Au(30)-Au(36)  | 44.4  |
| Au(7)-Au(31)-Au(30)  | 70.5  |
| Au(7)-Au(31)-Au(32)  | 77.0  |
| Au(7)-Au(31)-Au(34)  | 66.0  |
| Au(7)-Au(31)-Au(35)  | 58.7  |
| Au(7)-Au(31)-Au(40)  | 129.5 |
| Au(30)-Au(31)-Au(32) | 70.9  |
| Au(30)-Au(31)-Au(40) | 141.5 |
| Au(32)-Au(31)-Au(40) | 81.7  |
| Au(34)-Au(31)-Au(30) | 135.1 |
| Au(34)-Au(31)-Au(32) | 108.4 |
| Au(34)-Au(31)-Au(35) | 57.9  |
| Au(34)-Au(31)-Au(40) | 78.6  |
| Au(35)-Au(31)-Au(30) | 90.3  |
| Au(35)-Au(31)-Au(32) | 135.6 |
| Au(35)-Au(31)-Au(40) | 127.9 |
| S(13)-Au(31)-Au(7)   | 168.8 |

|                      |       |
|----------------------|-------|
| S(13)-Au(31)-Au(30)  | 119.3 |
| S(13)-Au(31)-Au(32)  | 110.5 |
| S(13)-Au(31)-Au(34)  | 103.2 |
| S(13)-Au(31)-Au(35)  | 113.7 |
| S(13)-Au(31)-Au(40)  | 46.7  |
| Au(8)-Au(32)-Au(31)  | 93.8  |
| Au(8)-Au(32)-Au(33)  | 58.4  |
| Au(31)-Au(32)-Au(33) | 67.2  |
| S(11)-Au(32)-Au(8)   | 91.3  |
| S(11)-Au(32)-Au(31)  | 89.4  |
| S(11)-Au(32)-Au(33)  | 138.4 |
| S(11)-Au(32)-S(12)   | 172.9 |
| S(12)-Au(32)-Au(8)   | 94.9  |
| S(12)-Au(32)-Au(31)  | 93.8  |
| S(12)-Au(32)-Au(33)  | 48.7  |
| Au(1)-Au(33)-Au(8)   | 87.1  |
| Au(1)-Au(33)-Au(32)  | 132.6 |
| Au(7)-Au(33)-Au(1)   | 59.1  |
| Au(7)-Au(33)-Au(8)   | 55.7  |
| Au(7)-Au(33)-Au(32)  | 74.3  |
| Au(8)-Au(33)-Au(32)  | 57.9  |
| Au(9)-Au(33)-Au(1)   | 56.9  |
| Au(9)-Au(33)-Au(7)   | 90.4  |
| Au(9)-Au(33)-Au(8)   | 65.5  |
| Au(9)-Au(33)-Au(32)  | 119.9 |
| Au(9)-Au(33)-Au(34)  | 117.1 |
| Au(20)-Au(33)-Au(1)  | 56.9  |
| Au(20)-Au(33)-Au(7)  | 115.2 |
| Au(20)-Au(33)-Au(8)  | 127.4 |
| Au(20)-Au(33)-Au(9)  | 62.8  |

|                      |       |
|----------------------|-------|
| Au(20)-Au(33)-Au(32) | 170.5 |
| Au(20)-Au(33)-Au(34) | 78.3  |
| Au(34)-Au(33)-Au(1)  | 60.6  |
| Au(34)-Au(33)-Au(7)  | 63.1  |
| Au(34)-Au(33)-Au(8)  | 118.7 |
| Au(34)-Au(33)-Au(32) | 106.6 |
| S(12)-Au(33)-Au(1)   | 179.0 |
| S(12)-Au(33)-Au(7)   | 120.1 |
| S(12)-Au(33)-Au(8)   | 92.9  |
| S(12)-Au(33)-Au(9)   | 124.0 |
| S(12)-Au(33)-Au(20)  | 123.8 |
| S(12)-Au(33)-Au(32)  | 46.7  |
| S(12)-Au(33)-Au(34)  | 118.5 |
| Au(1)-Au(34)-Au(7)   | 58.5  |
| Au(1)-Au(34)-Au(17)  | 55.7  |
| Au(1)-Au(34)-Au(19)  | 73.4  |
| Au(7)-Au(34)-Au(17)  | 87.2  |
| Au(7)-Au(34)-Au(19)  | 131.5 |
| Au(17)-Au(34)-Au(19) | 58.5  |
| Au(31)-Au(34)-Au(1)  | 113.8 |
| Au(31)-Au(34)-Au(7)  | 56.1  |
| Au(31)-Au(34)-Au(17) | 127.5 |
| Au(31)-Au(34)-Au(19) | 172.2 |
| Au(31)-Au(34)-Au(33) | 77.5  |
| Au(33)-Au(34)-Au(1)  | 62.2  |
| Au(33)-Au(34)-Au(7)  | 59.7  |
| Au(33)-Au(34)-Au(17) | 117.9 |
| Au(33)-Au(34)-Au(19) | 104.6 |
| Au(35)-Au(34)-Au(1)  | 89.8  |
| Au(35)-Au(34)-Au(7)  | 57.3  |

|                      |       |
|----------------------|-------|
| Au(35)-Au(34)-Au(17) | 65.1  |
| Au(35)-Au(34)-Au(19) | 120.8 |
| Au(35)-Au(34)-Au(31) | 63.5  |
| Au(35)-Au(34)-Au(33) | 116.7 |
| S(25)-Au(34)-Au(1)   | 118.7 |
| S(25)-Au(34)-Au(7)   | 175.8 |
| S(25)-Au(34)-Au(17)  | 93.5  |
| S(25)-Au(34)-Au(19)  | 46.4  |
| S(25)-Au(34)-Au(31)  | 125.9 |
| S(25)-Au(34)-Au(33)  | 116.5 |
| S(25)-Au(34)-Au(35)  | 126.6 |
| Au(2)-Au(35)-Au(17)  | 54.6  |
| Au(2)-Au(35)-Au(37)  | 76.4  |
| Au(7)-Au(35)-Au(2)   | 61.3  |
| Au(7)-Au(35)-Au(17)  | 89.3  |
| Au(7)-Au(35)-Au(31)  | 57.2  |
| Au(7)-Au(35)-Au(36)  | 64.0  |
| Au(7)-Au(35)-Au(37)  | 131.9 |
| Au(17)-Au(35)-Au(37) | 83.5  |
| Au(31)-Au(35)-Au(2)  | 118.3 |
| Au(31)-Au(35)-Au(17) | 118.8 |
| Au(31)-Au(35)-Au(36) | 97.9  |
| Au(31)-Au(35)-Au(37) | 157.4 |
| Au(34)-Au(35)-Au(2)  | 92.5  |
| Au(34)-Au(35)-Au(7)  | 65.7  |
| Au(34)-Au(35)-Au(17) | 61.2  |
| Au(34)-Au(35)-Au(31) | 58.6  |
| Au(34)-Au(35)-Au(36) | 129.2 |
| Au(34)-Au(35)-Au(37) | 142.0 |
| Au(36)-Au(35)-Au(2)  | 57.5  |

|                      |       |
|----------------------|-------|
| Au(36)-Au(35)-Au(17) | 111.8 |
| Au(36)-Au(35)-Au(37) | 74.9  |
| S(22)-Au(35)-Au(2)   | 116.3 |
| S(22)-Au(35)-Au(7)   | 175.0 |
| S(22)-Au(35)-Au(17)  | 92.4  |
| S(22)-Au(35)-Au(31)  | 125.5 |
| S(22)-Au(35)-Au(34)  | 119.2 |
| S(22)-Au(35)-Au(36)  | 111.0 |
| S(22)-Au(35)-Au(37)  | 43.8  |
| Au(2)-Au(36)-Au(7)   | 60.3  |
| Au(2)-Au(36)-Au(28)  | 125.9 |
| Au(2)-Au(36)-Au(29)  | 90.7  |
| Au(2)-Au(36)-Au(30)  | 120.9 |
| Au(2)-Au(36)-Au(35)  | 63.2  |
| Au(3)-Au(36)-Au(2)   | 59.9  |
| Au(3)-Au(36)-Au(4)   | 60.1  |
| Au(3)-Au(36)-Au(7)   | 120.1 |
| Au(3)-Au(36)-Au(28)  | 91.7  |
| Au(3)-Au(36)-Au(29)  | 123.6 |
| Au(3)-Au(36)-Au(30)  | 178.7 |
| Au(3)-Au(36)-Au(35)  | 98.6  |
| Au(4)-Au(36)-Au(2)   | 60.9  |
| Au(4)-Au(36)-Au(7)   | 89.3  |
| Au(4)-Au(36)-Au(28)  | 65.0  |
| Au(4)-Au(36)-Au(29)  | 63.5  |
| Au(4)-Au(36)-Au(30)  | 121.2 |
| Au(4)-Au(36)-Au(35)  | 123.3 |
| Au(7)-Au(36)-Au(28)  | 122.0 |
| Au(7)-Au(36)-Au(30)  | 60.7  |
| Au(28)-Au(36)-Au(30) | 88.6  |

|                      |       |
|----------------------|-------|
| Au(29)-Au(36)-Au(7)  | 55.4  |
| Au(29)-Au(36)-Au(28) | 66.7  |
| Au(29)-Au(36)-Au(30) | 57.7  |
| Au(35)-Au(36)-Au(7)  | 54.9  |
| Au(35)-Au(36)-Au(28) | 169.1 |
| Au(35)-Au(36)-Au(29) | 109.6 |
| Au(35)-Au(36)-Au(30) | 81.0  |
| S(26)-Au(36)-Au(2)   | 139.5 |
| S(26)-Au(36)-Au(3)   | 135.8 |
| S(26)-Au(36)-Au(4)   | 155.8 |
| S(26)-Au(36)-Au(7)   | 93.3  |
| S(26)-Au(36)-Au(28)  | 93.6  |
| S(26)-Au(36)-Au(29)  | 98.6  |
| S(26)-Au(36)-Au(30)  | 42.9  |
| S(26)-Au(36)-Au(35)  | 76.7  |
| Au(3)-Au(37)-Au(35)  | 84.9  |
| Au(18)-Au(37)-Au(3)  | 84.0  |
| Au(18)-Au(37)-Au(35) | 90.9  |
| S(21)-Au(37)-Au(3)   | 51.1  |
| S(21)-Au(37)-Au(18)  | 89.3  |
| S(21)-Au(37)-Au(35)  | 135.7 |
| S(21)-Au(37)-S(22)   | 171.8 |
| S(22)-Au(37)-Au(3)   | 130.0 |
| S(22)-Au(37)-Au(18)  | 98.9  |
| S(22)-Au(37)-Au(35)  | 45.3  |
| Au(3)-Au(38)-Au(24)  | 94.5  |
| Au(3)-Au(38)-Au(26)  | 57.0  |
| Au(24)-Au(38)-Au(26) | 68.2  |
| S(19)-Au(38)-Au(3)   | 93.8  |
| S(19)-Au(38)-Au(24)  | 92.0  |

|                      |       |
|----------------------|-------|
| S(19)-Au(38)-Au(26)  | 47.7  |
| S(20)-Au(38)-Au(3)   | 93.5  |
| S(20)-Au(38)-Au(24)  | 89.1  |
| S(20)-Au(38)-Au(26)  | 139.1 |
| S(20)-Au(38)-S(19)   | 172.5 |
| Au(4)-Au(39)-Au(22)  | 88.9  |
| Au(4)-Au(39)-Au(27)  | 132.1 |
| Au(6)-Au(39)-Au(4)   | 60.6  |
| Au(6)-Au(39)-Au(22)  | 57.1  |
| Au(6)-Au(39)-Au(27)  | 71.8  |
| Au(22)-Au(39)-Au(27) | 58.8  |
| Au(23)-Au(39)-Au(4)  | 58.6  |
| Au(23)-Au(39)-Au(6)  | 94.3  |
| Au(23)-Au(39)-Au(22) | 67.6  |
| Au(23)-Au(39)-Au(26) | 118.7 |
| Au(23)-Au(39)-Au(27) | 123.4 |
| Au(24)-Au(39)-Au(4)  | 57.8  |
| Au(24)-Au(39)-Au(6)  | 117.3 |
| Au(24)-Au(39)-Au(22) | 130.0 |
| Au(24)-Au(39)-Au(23) | 63.3  |
| Au(24)-Au(39)-Au(26) | 78.3  |
| Au(24)-Au(39)-Au(27) | 169.4 |
| Au(26)-Au(39)-Au(4)  | 60.7  |
| Au(26)-Au(39)-Au(6)  | 62.4  |
| Au(26)-Au(39)-Au(22) | 119.5 |
| Au(26)-Au(39)-Au(27) | 102.9 |
| S(6)-Au(39)-Au(4)    | 173.7 |
| S(6)-Au(39)-Au(6)    | 116.5 |
| S(6)-Au(39)-Au(22)   | 93.9  |
| S(6)-Au(39)-Au(23)   | 127.7 |



|                     |       |
|---------------------|-------|
| S(6)-Au(39)-Au(24)  | 123.4 |
| S(6)-Au(39)-Au(26)  | 113.0 |
| S(6)-Au(39)-Au(27)  | 46.3  |
| S(13)-Au(40)-Au(31) | 47.3  |
| S(14)-Au(40)-Au(31) | 138.6 |
| S(14)-Au(40)-S(13)  | 172.2 |
| S(14)-Au(41)-Au(20) | 140.6 |
| S(15)-Au(41)-Au(20) | 46.5  |
| S(15)-Au(41)-S(14)  | 171.4 |
| S(7)-Au(42)-Au(14)  | 45.2  |
| S(7)-Au(42)-S(8)    | 171.0 |
| S(8)-Au(42)-Au(14)  | 140.6 |
| Au(10)-S(1)-Au(22)  | 81.2  |
| C(1)-S(1)-Au(10)    | 101.0 |
| C(1)-S(1)-Au(22)    | 105.2 |
| Au(11)-S(2)-Au(23)  | 90.1  |
| C(7)-S(2)-Au(11)    | 99.3  |
| C(7)-S(2)-Au(23)    | 113.2 |
| Au(11)-S(3)-Au(8)   | 79.4  |
| C(13)-S(3)-Au(8)    | 106.1 |
| C(13)-S(3)-Au(11)   | 107.6 |
| Au(10)-S(4)-Au(9)   | 91.8  |
| C(19)-S(4)-Au(9)    | 103.7 |
| C(19)-S(4)-Au(10)   | 102.7 |
| Au(27)-S(5)-Au(13)  | 97.9  |
| C(25)-S(5)-Au(13)   | 104.4 |
| C(25)-S(5)-Au(27)   | 104.1 |
| Au(27)-S(6)-Au(39)  | 85.7  |
| C(31)-S(6)-Au(27)   | 109.1 |
| C(31)-S(6)-Au(39)   | 104.2 |

|                     |       |
|---------------------|-------|
| Au(42)-S(7)-Au(14)  | 90.4  |
| C(37)-S(7)-Au(14)   | 112.8 |
| C(37)-S(7)-Au(42)   | 106.5 |
| Au(42)-S(8)-Au(25)  | 107.7 |
| C(43)-S(8)-Au(25)   | 102.8 |
| C(43)-S(8)-Au(42)   | 104.0 |
| Au(25)-S(9)-Au(24)  | 92.3  |
| C(49)-S(9)-Au(24)   | 109.6 |
| C(49)-S(9)-Au(25)   | 103.7 |
| Au(28)-S(10)-Au(29) | 90.2  |
| C(55)-S(10)-Au(28)  | 104.6 |
| C(55)-S(10)-Au(29)  | 119.6 |
| Au(32)-S(11)-Au(30) | 99.7  |
| C(61)-S(11)-Au(30)  | 106.6 |
| C(61)-S(11)-Au(32)  | 104.0 |
| Au(32)-S(12)-Au(33) | 84.6  |
| C(67)-S(12)-Au(32)  | 109.3 |
| C(67)-S(12)-Au(33)  | 101.4 |
| Au(40)-S(13)-Au(31) | 86.0  |
| C(73)-S(13)-Au(31)  | 126.2 |
| C(73)-S(13)-Au(40)  | 136.6 |
| Au(40)-S(14)-Au(41) | 106.1 |
| C(79)-S(14)-Au(40)  | 102.4 |
| C(79)-S(14)-Au(41)  | 106.1 |
| Au(41)-S(15)-Au(20) | 88.7  |
| C(85)-S(15)-Au(20)  | 107.5 |
| C(85)-S(15)-Au(41)  | 103.8 |
| Au(21)-S(16)-Au(12) | 92.7  |
| C(91)-S(16)-Au(12)  | 111.9 |
| C(91)-S(16)-Au(21)  | 109.7 |

|                     |       |
|---------------------|-------|
| Au(13)-S(17)-Au(16) | 90.1  |
| C(97)-S(17)-Au(13)  | 106.6 |
| C(97)-S(17)-Au(16)  | 113.3 |
| Au(18)-S(18)-Au(15) | 89.6  |
| C(103)-S(18)-Au(15) | 105.4 |
| C(103)-S(18)-Au(18) | 100.2 |
| Au(38)-S(19)-Au(26) | 85.6  |
| C(109)-S(19)-Au(26) | 103.0 |
| C(109)-S(19)-Au(38) | 108.3 |
| Au(38)-S(20)-Au(28) | 98.0  |
| C(115)-S(20)-Au(28) | 100.5 |
| C(115)-S(20)-Au(38) | 100.1 |
| Au(37)-S(21)-Au(3)  | 80.7  |
| C(121)-S(21)-Au(3)  | 105.4 |
| C(121)-S(21)-Au(37) | 103.7 |
| Au(37)-S(22)-Au(35) | 90.8  |
| C(127)-S(22)-Au(35) | 103.8 |
| C(127)-S(22)-Au(37) | 99.1  |
| Au(18)-S(23)-Au(17) | 79.6  |
| C(133)-S(23)-Au(17) | 108.3 |
| C(133)-S(23)-Au(18) | 97.3  |
| Au(19)-S(24)-Au(21) | 100.7 |
| C(139)-S(24)-Au(19) | 103.4 |
| C(139)-S(24)-Au(21) | 103.7 |
| Au(19)-S(25)-Au(34) | 85.9  |
| C(145)-S(25)-Au(19) | 106.1 |
| C(145)-S(25)-Au(34) | 102.9 |
| Au(30)-S(26)-Au(36) | 92.7  |
| C(151)-S(26)-Au(30) | 109.6 |
| C(151)-S(26)-Au(36) | 114.1 |

|                  |       |
|------------------|-------|
| S(1)-C(1)-H(1)   | 110.7 |
| C(2)-C(1)-S(1)   | 110.9 |
| C(2)-C(1)-H(1)   | 110.7 |
| C(2)-C(1)-C(6)   | 109.6 |
| C(6)-C(1)-S(1)   | 104.1 |
| C(6)-C(1)-H(1)   | 110.7 |
| C(1)-C(2)-H(2A)  | 109.2 |
| C(1)-C(2)-H(2B)  | 109.2 |
| C(1)-C(2)-C(3)   | 111.8 |
| H(2A)-C(2)-H(2B) | 107.9 |
| C(3)-C(2)-H(2A)  | 109.2 |
| C(3)-C(2)-H(2B)  | 109.2 |
| C(2)-C(3)-H(3A)  | 111.1 |
| C(2)-C(3)-H(3B)  | 111.1 |
| C(2)-C(3)-C(4)   | 103.2 |
| H(3A)-C(3)-H(3B) | 109.1 |
| C(4)-C(3)-H(3A)  | 111.1 |
| C(4)-C(3)-H(3B)  | 111.1 |
| C(3)-C(4)-H(4A)  | 110.0 |
| C(3)-C(4)-H(4B)  | 110.0 |
| H(4A)-C(4)-H(4B) | 108.4 |
| C(5)-C(4)-C(3)   | 108.4 |
| C(5)-C(4)-H(4A)  | 110.0 |
| C(5)-C(4)-H(4B)  | 110.0 |
| C(4)-C(5)-H(5A)  | 110.3 |
| C(4)-C(5)-H(5B)  | 110.3 |
| C(4)-C(5)-C(6)   | 107.0 |
| H(5A)-C(5)-H(5B) | 108.6 |
| C(6)-C(5)-H(5A)  | 110.3 |
| C(6)-C(5)-H(5B)  | 110.3 |

|                     |       |
|---------------------|-------|
| C(1)-C(6)-H(6A)     | 109.1 |
| C(1)-C(6)-H(6B)     | 109.1 |
| C(5)-C(6)-C(1)      | 112.5 |
| C(5)-C(6)-H(6A)     | 109.1 |
| C(5)-C(6)-H(6B)     | 109.1 |
| H(6A)-C(6)-H(6B)    | 107.8 |
| S(2)-C(7)-H(7)      | 105.2 |
| C(8)-C(7)-S(2)      | 107.6 |
| C(8)-C(7)-H(7)      | 105.2 |
| C(12)-C(7)-S(2)     | 115.1 |
| C(12)-C(7)-H(7)     | 105.2 |
| C(12)-C(7)-C(8)     | 117.5 |
| C(7)-C(8)-H(8A)     | 108.8 |
| C(7)-C(8)-H(8B)     | 108.8 |
| C(7)-C(8)-C(9)      | 113.7 |
| H(8A)-C(8)-H(8B)    | 107.7 |
| C(9)-C(8)-H(8A)     | 108.8 |
| C(9)-C(8)-H(8B)     | 108.8 |
| C(8)-C(9)-H(9A)     | 112.1 |
| C(8)-C(9)-H(9B)     | 112.0 |
| C(8)-C(9)-C(10)     | 98.6  |
| H(9A)-C(9)-H(9B)    | 109.7 |
| C(10)-C(9)-H(9A)    | 112.0 |
| C(10)-C(9)-H(9B)    | 112.0 |
| C(9)-C(10)-H(10A)   | 109.8 |
| C(9)-C(10)-H(10B)   | 109.8 |
| H(10A)-C(10)-H(10B) | 108.3 |
| C(11)-C(10)-C(9)    | 109.3 |
| C(11)-C(10)-H(10A)  | 109.8 |
| C(11)-C(10)-H(10B)  | 109.8 |

|                     |       |
|---------------------|-------|
| C(10)-C(11)-H(11A)  | 108.8 |
| C(10)-C(11)-H(11B)  | 108.8 |
| C(10)-C(11)-C(12)   | 114.0 |
| H(11A)-C(11)-H(11B) | 107.7 |
| C(12)-C(11)-H(11A)  | 108.8 |
| C(12)-C(11)-H(11B)  | 108.8 |
| C(7)-C(12)-C(11)    | 115.1 |
| C(7)-C(12)-H(12A)   | 108.5 |
| C(7)-C(12)-H(12B)   | 108.5 |
| C(11)-C(12)-H(12A)  | 108.5 |
| C(11)-C(12)-H(12B)  | 108.5 |
| H(12A)-C(12)-H(12B) | 107.5 |
| S(3)-C(13)-H(13)    | 103.0 |
| C(14)-C(13)-S(3)    | 104.9 |
| C(14)-C(13)-H(13)   | 103.0 |
| C(18)-C(13)-S(3)    | 113.0 |
| C(18)-C(13)-H(13)   | 103.0 |
| C(18)-C(13)-C(14)   | 126.9 |
| C(13)-C(14)-H(14A)  | 108.7 |
| C(13)-C(14)-H(14B)  | 108.7 |
| C(13)-C(14)-C(15)   | 114.3 |
| H(14A)-C(14)-H(14B) | 107.6 |
| C(15)-C(14)-H(14A)  | 108.7 |
| C(15)-C(14)-H(14B)  | 108.7 |
| C(14)-C(15)-H(15A)  | 110.0 |
| C(14)-C(15)-H(15B)  | 110.0 |
| H(15A)-C(15)-H(15B) | 108.4 |
| C(16)-C(15)-C(14)   | 108.6 |
| C(16)-C(15)-H(15A)  | 110.0 |
| C(16)-C(15)-H(15B)  | 110.0 |

|                     |       |
|---------------------|-------|
| C(15)-C(16)-H(16A)  | 109.9 |
| C(15)-C(16)-H(16B)  | 109.9 |
| H(16A)-C(16)-H(16B) | 108.3 |
| C(17)-C(16)-C(15)   | 109.1 |
| C(17)-C(16)-H(16A)  | 109.9 |
| C(17)-C(16)-H(16B)  | 109.9 |
| C(16)-C(17)-H(17A)  | 107.1 |
| C(16)-C(17)-H(17B)  | 107.1 |
| H(17A)-C(17)-H(17B) | 106.8 |
| C(18)-C(17)-C(16)   | 120.9 |
| C(18)-C(17)-H(17A)  | 107.1 |
| C(18)-C(17)-H(17B)  | 107.1 |
| C(13)-C(18)-C(17)   | 99.7  |
| C(13)-C(18)-H(18A)  | 111.8 |
| C(13)-C(18)-H(18B)  | 111.8 |
| C(17)-C(18)-H(18A)  | 111.8 |
| C(17)-C(18)-H(18B)  | 111.8 |
| H(18A)-C(18)-H(18B) | 109.5 |
| S(4)-C(19)-H(19)    | 108.4 |
| C(20)-C(19)-S(4)    | 112.0 |
| C(20)-C(19)-H(19)   | 108.4 |
| C(24)-C(19)-S(4)    | 108.1 |
| C(24)-C(19)-H(19)   | 108.4 |
| C(24)-C(19)-C(20)   | 111.3 |
| C(19)-C(20)-H(20A)  | 110.3 |
| C(19)-C(20)-H(20B)  | 110.3 |
| C(19)-C(20)-C(21)   | 107.0 |
| H(20A)-C(20)-H(20B) | 108.6 |
| C(21)-C(20)-H(20A)  | 110.3 |
| C(21)-C(20)-H(20B)  | 110.3 |

|                     |       |
|---------------------|-------|
| C(20)-C(21)-H(21A)  | 108.0 |
| C(20)-C(21)-H(21B)  | 108.0 |
| H(21A)-C(21)-H(21B) | 107.3 |
| C(22)-C(21)-C(20)   | 117.1 |
| C(22)-C(21)-H(21A)  | 108.0 |
| C(22)-C(21)-H(21B)  | 108.0 |
| C(21)-C(22)-H(22A)  | 109.0 |
| C(21)-C(22)-H(22B)  | 109.0 |
| C(21)-C(22)-C(23)   | 113.0 |
| H(22A)-C(22)-H(22B) | 107.8 |
| C(23)-C(22)-H(22A)  | 109.0 |
| C(23)-C(22)-H(22B)  | 109.0 |
| C(22)-C(23)-H(23A)  | 111.2 |
| C(22)-C(23)-H(23B)  | 111.2 |
| H(23A)-C(23)-H(23B) | 109.1 |
| C(24)-C(23)-C(22)   | 103.0 |
| C(24)-C(23)-H(23A)  | 111.2 |
| C(24)-C(23)-H(23B)  | 111.2 |
| C(19)-C(24)-C(23)   | 113.0 |
| C(19)-C(24)-H(24A)  | 109.0 |
| C(19)-C(24)-H(24B)  | 109.0 |
| C(23)-C(24)-H(24A)  | 109.0 |
| C(23)-C(24)-H(24B)  | 109.0 |
| H(24A)-C(24)-H(24B) | 107.8 |
| S(5)-C(25)-H(25)    | 105.8 |
| C(26)-C(25)-S(5)    | 112.7 |
| C(26)-C(25)-H(25)   | 105.8 |
| C(26)-C(25)-C(30)   | 113.2 |
| C(30)-C(25)-S(5)    | 112.8 |
| C(30)-C(25)-H(25)   | 105.8 |



|                     |       |
|---------------------|-------|
| C(25)-C(26)-H(26A)  | 110.6 |
| C(25)-C(26)-H(26B)  | 110.6 |
| C(25)-C(26)-C(27)   | 105.7 |
| H(26A)-C(26)-H(26B) | 108.7 |
| C(27)-C(26)-H(26A)  | 110.6 |
| C(27)-C(26)-H(26B)  | 110.6 |
| C(26)-C(27)-H(27A)  | 109.2 |
| C(26)-C(27)-H(27B)  | 109.2 |
| H(27A)-C(27)-H(27B) | 107.9 |
| C(28)-C(27)-C(26)   | 111.9 |
| C(28)-C(27)-H(27A)  | 109.2 |
| C(28)-C(27)-H(27B)  | 109.2 |
| C(27)-C(28)-H(28A)  | 109.3 |
| C(27)-C(28)-H(28B)  | 109.3 |
| H(28A)-C(28)-H(28B) | 108.0 |
| C(29)-C(28)-C(27)   | 111.6 |
| C(29)-C(28)-H(28A)  | 109.3 |
| C(29)-C(28)-H(28B)  | 109.3 |
| C(28)-C(29)-H(29A)  | 106.7 |
| C(28)-C(29)-H(29B)  | 106.7 |
| C(28)-C(29)-C(30)   | 122.4 |
| H(29A)-C(29)-H(29B) | 106.6 |
| C(30)-C(29)-H(29A)  | 106.7 |
| C(30)-C(29)-H(29B)  | 106.7 |
| C(25)-C(30)-H(30A)  | 109.7 |
| C(25)-C(30)-H(30B)  | 109.7 |
| C(29)-C(30)-C(25)   | 110.0 |
| C(29)-C(30)-H(30A)  | 109.7 |
| C(29)-C(30)-H(30B)  | 109.7 |
| H(30A)-C(30)-H(30B) | 108.2 |

|                     |       |
|---------------------|-------|
| S(6)-C(31)-H(31)    | 110.6 |
| C(32)-C(31)-S(6)    | 108.0 |
| C(32)-C(31)-H(31)   | 110.6 |
| C(36)-C(31)-S(6)    | 108.6 |
| C(36)-C(31)-H(31)   | 110.6 |
| C(36)-C(31)-C(32)   | 108.3 |
| C(31)-C(32)-H(32A)  | 109.2 |
| C(31)-C(32)-H(32B)  | 109.2 |
| C(31)-C(32)-C(33)   | 111.8 |
| H(32A)-C(32)-H(32B) | 107.9 |
| C(33)-C(32)-H(32A)  | 109.2 |
| C(33)-C(32)-H(32B)  | 109.2 |
| C(32)-C(33)-H(33A)  | 109.3 |
| C(32)-C(33)-H(33B)  | 109.3 |
| H(33A)-C(33)-H(33B) | 108.0 |
| C(34)-C(33)-C(32)   | 111.6 |
| C(34)-C(33)-H(33A)  | 109.3 |
| C(34)-C(33)-H(33B)  | 109.3 |
| C(33)-C(34)-H(34A)  | 108.6 |
| C(33)-C(34)-H(34B)  | 108.6 |
| C(33)-C(34)-C(35)   | 114.5 |
| H(34A)-C(34)-H(34B) | 107.6 |
| C(35)-C(34)-H(34A)  | 108.6 |
| C(35)-C(34)-H(34B)  | 108.6 |
| C(34)-C(35)-H(35A)  | 109.1 |
| C(34)-C(35)-H(35B)  | 109.1 |
| H(35A)-C(35)-H(35B) | 107.9 |
| C(36)-C(35)-C(34)   | 112.3 |
| C(36)-C(35)-H(35A)  | 109.1 |
| C(36)-C(35)-H(35B)  | 109.1 |

|                     |       |
|---------------------|-------|
| C(31)-C(36)-C(35)   | 110.7 |
| C(31)-C(36)-H(36A)  | 109.5 |
| C(31)-C(36)-H(36B)  | 109.5 |
| C(35)-C(36)-H(36A)  | 109.5 |
| C(35)-C(36)-H(36B)  | 109.5 |
| H(36A)-C(36)-H(36B) | 108.1 |
| S(7)-C(37)-H(37)    | 109.6 |
| C(38)-C(37)-S(7)    | 104.9 |
| C(38)-C(37)-H(37)   | 109.6 |
| C(38)-C(37)-C(42)   | 114.6 |
| C(42)-C(37)-S(7)    | 108.4 |
| C(42)-C(37)-H(37)   | 109.6 |
| C(37)-C(38)-H(38A)  | 110.9 |
| C(37)-C(38)-H(38B)  | 110.9 |
| C(37)-C(38)-C(39)   | 104.3 |
| H(38A)-C(38)-H(38B) | 108.9 |
| C(39)-C(38)-H(38A)  | 110.9 |
| C(39)-C(38)-H(38B)  | 110.9 |
| C(38)-C(39)-H(39A)  | 109.7 |
| C(38)-C(39)-H(39B)  | 109.7 |
| H(39A)-C(39)-H(39B) | 108.2 |
| C(40)-C(39)-C(38)   | 109.9 |
| C(40)-C(39)-H(39A)  | 109.7 |
| C(40)-C(39)-H(39B)  | 109.7 |
| C(39)-C(40)-H(40A)  | 108.8 |
| C(39)-C(40)-H(40B)  | 108.8 |
| C(39)-C(40)-C(41)   | 113.9 |
| H(40A)-C(40)-H(40B) | 107.7 |
| C(41)-C(40)-H(40A)  | 108.8 |
| C(41)-C(40)-H(40B)  | 108.8 |

|                     |       |
|---------------------|-------|
| C(40)-C(41)-H(41A)  | 110.3 |
| C(40)-C(41)-H(41B)  | 110.3 |
| H(41A)-C(41)-H(41B) | 108.6 |
| C(42)-C(41)-C(40)   | 107.1 |
| C(42)-C(41)-H(41A)  | 110.3 |
| C(42)-C(41)-H(41B)  | 110.3 |
| C(37)-C(42)-H(42A)  | 110.9 |
| C(37)-C(42)-H(42B)  | 110.9 |
| C(41)-C(42)-C(37)   | 104.3 |
| C(41)-C(42)-H(42A)  | 110.9 |
| C(41)-C(42)-H(42B)  | 110.9 |
| H(42A)-C(42)-H(42B) | 108.9 |
| S(8)-C(43)-H(43)    | 102.5 |
| C(44)-C(43)-S(8)    | 113.0 |
| C(44)-C(43)-H(43)   | 102.5 |
| C(48)-C(43)-S(8)    | 124.6 |
| C(48)-C(43)-H(43)   | 102.5 |
| C(48)-C(43)-C(44)   | 108.6 |
| C(43)-C(44)-H(44A)  | 107.6 |
| C(43)-C(44)-H(44B)  | 107.6 |
| H(44A)-C(44)-H(44B) | 107.0 |
| C(45)-C(44)-C(43)   | 118.8 |
| C(45)-C(44)-H(44A)  | 107.6 |
| C(45)-C(44)-H(44B)  | 107.6 |
| C(44)-C(45)-H(45A)  | 111.2 |
| C(44)-C(45)-H(45B)  | 111.2 |
| C(44)-C(45)-C(46)   | 102.9 |
| H(45A)-C(45)-H(45B) | 109.1 |
| C(46)-C(45)-H(45A)  | 111.2 |
| C(46)-C(45)-H(45B)  | 111.2 |

|                     |       |
|---------------------|-------|
| C(45)-C(46)-H(46A)  | 109.3 |
| C(45)-C(46)-H(46B)  | 109.3 |
| C(45)-C(46)-C(47)   | 111.4 |
| H(46A)-C(46)-H(46B) | 108.0 |
| C(47)-C(46)-H(46A)  | 109.3 |
| C(47)-C(46)-H(46B)  | 109.3 |
| C(46)-C(47)-H(47A)  | 110.2 |
| C(46)-C(47)-H(47B)  | 110.2 |
| H(47A)-C(47)-H(47B) | 108.5 |
| C(48)-C(47)-C(46)   | 107.5 |
| C(48)-C(47)-H(47A)  | 110.2 |
| C(48)-C(47)-H(47B)  | 110.2 |
| C(43)-C(48)-C(47)   | 126.9 |
| C(43)-C(48)-H(48A)  | 105.6 |
| C(43)-C(48)-H(48B)  | 105.6 |
| C(47)-C(48)-H(48A)  | 105.6 |
| C(47)-C(48)-H(48B)  | 105.6 |
| H(48A)-C(48)-H(48B) | 106.1 |
| S(9)-C(49)-H(49)    | 109.9 |
| C(50)-C(49)-S(9)    | 111.0 |
| C(50)-C(49)-H(49)   | 109.9 |
| C(50)-C(49)-C(54)   | 109.3 |
| C(54)-C(49)-S(9)    | 106.7 |
| C(54)-C(49)-H(49)   | 109.9 |
| C(49)-C(50)-H(50A)  | 109.2 |
| C(49)-C(50)-H(50B)  | 109.2 |
| H(50A)-C(50)-H(50B) | 107.9 |
| C(51)-C(50)-C(49)   | 111.9 |
| C(51)-C(50)-H(50A)  | 109.2 |
| C(51)-C(50)-H(50B)  | 109.2 |

|                     |       |
|---------------------|-------|
| C(50)-C(51)-H(51A)  | 110.5 |
| C(50)-C(51)-H(51B)  | 110.5 |
| C(50)-C(51)-C(52)   | 106.1 |
| H(51A)-C(51)-H(51B) | 108.7 |
| C(52)-C(51)-H(51A)  | 110.5 |
| C(52)-C(51)-H(51B)  | 110.5 |
| C(51)-C(52)-H(52A)  | 110.4 |
| C(51)-C(52)-H(52B)  | 110.4 |
| H(52A)-C(52)-H(52B) | 108.6 |
| C(53)-C(52)-C(51)   | 106.5 |
| C(53)-C(52)-H(52A)  | 110.4 |
| C(53)-C(52)-H(52B)  | 110.4 |
| C(52)-C(53)-H(53A)  | 107.8 |
| C(52)-C(53)-H(53B)  | 107.8 |
| C(52)-C(53)-C(54)   | 118.2 |
| H(53A)-C(53)-H(53B) | 107.1 |
| C(54)-C(53)-H(53A)  | 107.8 |
| C(54)-C(53)-H(53B)  | 107.8 |
| C(49)-C(54)-H(54A)  | 110.7 |
| C(49)-C(54)-H(54B)  | 110.7 |
| C(53)-C(54)-C(49)   | 105.4 |
| C(53)-C(54)-H(54A)  | 110.7 |
| C(53)-C(54)-H(54B)  | 110.7 |
| H(54A)-C(54)-H(54B) | 108.8 |
| C(56)-C(55)-S(10)   | 115.7 |
| C(60)-C(55)-S(10)   | 132.2 |
| C(60)-C(55)-C(56)   | 109.3 |
| C(55)-C(56)-H(56A)  | 109.9 |
| C(55)-C(56)-H(56B)  | 109.9 |
| C(55)-C(56)-C(57)   | 108.8 |

|                     |       |
|---------------------|-------|
| H(56A)-C(56)-H(56B) | 108.3 |
| C(57)-C(56)-H(56A)  | 109.9 |
| C(57)-C(56)-H(56B)  | 109.9 |
| C(56)-C(57)-H(57A)  | 110.1 |
| C(56)-C(57)-H(57B)  | 110.1 |
| C(56)-C(57)-C(58)   | 108.2 |
| H(57A)-C(57)-H(57B) | 108.4 |
| C(58)-C(57)-H(57A)  | 110.1 |
| C(58)-C(57)-H(57B)  | 110.1 |
| C(57)-C(58)-H(58A)  | 109.9 |
| C(57)-C(58)-H(58B)  | 109.9 |
| H(58A)-C(58)-H(58B) | 108.3 |
| C(59)-C(58)-C(57)   | 108.9 |
| C(59)-C(58)-H(58A)  | 109.9 |
| C(59)-C(58)-H(58B)  | 109.9 |
| C(58)-C(59)-H(59A)  | 109.9 |
| C(58)-C(59)-H(59B)  | 109.9 |
| C(58)-C(59)-C(60)   | 109.0 |
| H(59A)-C(59)-H(59B) | 108.3 |
| C(60)-C(59)-H(59A)  | 109.9 |
| C(60)-C(59)-H(59B)  | 109.9 |
| C(55)-C(60)-C(59)   | 109.1 |
| C(55)-C(60)-H(60A)  | 109.9 |
| C(55)-C(60)-H(60B)  | 109.9 |
| C(59)-C(60)-H(60A)  | 109.9 |
| C(59)-C(60)-H(60B)  | 109.9 |
| H(60A)-C(60)-H(60B) | 108.3 |
| S(11)-C(61)-H(61)   | 110.0 |
| C(62)-C(61)-S(11)   | 111.1 |
| C(62)-C(61)-H(61)   | 110.0 |

|                     |       |
|---------------------|-------|
| C(66)-C(61)-S(11)   | 106.3 |
| C(66)-C(61)-H(61)   | 110.0 |
| C(66)-C(61)-C(62)   | 109.3 |
| C(61)-C(62)-H(62A)  | 111.7 |
| C(61)-C(62)-H(62B)  | 111.7 |
| H(62A)-C(62)-H(62B) | 109.5 |
| C(63)-C(62)-C(61)   | 100.4 |
| C(63)-C(62)-H(62A)  | 111.7 |
| C(63)-C(62)-H(62B)  | 111.7 |
| C(62)-C(63)-H(63A)  | 109.5 |
| C(62)-C(63)-H(63B)  | 109.5 |
| C(62)-C(63)-C(64)   | 110.7 |
| H(63A)-C(63)-H(63B) | 108.1 |
| C(64)-C(63)-H(63A)  | 109.5 |
| C(64)-C(63)-H(63B)  | 109.5 |
| C(63)-C(64)-H(64A)  | 110.6 |
| C(63)-C(64)-H(64B)  | 110.6 |
| H(64A)-C(64)-H(64B) | 108.7 |
| C(65)-C(64)-C(63)   | 105.7 |
| C(65)-C(64)-H(64A)  | 110.6 |
| C(65)-C(64)-H(64B)  | 110.6 |
| C(64)-C(65)-H(65A)  | 108.3 |
| C(64)-C(65)-H(65B)  | 108.3 |
| C(64)-C(65)-C(66)   | 116.1 |
| H(65A)-C(65)-H(65B) | 107.4 |
| C(66)-C(65)-H(65A)  | 108.3 |
| C(66)-C(65)-H(65B)  | 108.3 |
| C(61)-C(66)-C(65)   | 117.1 |
| C(61)-C(66)-H(66A)  | 108.0 |
| C(61)-C(66)-H(66B)  | 108.0 |



|                     |       |
|---------------------|-------|
| C(65)-C(66)-H(66A)  | 108.0 |
| C(65)-C(66)-H(66B)  | 108.0 |
| H(66A)-C(66)-H(66B) | 107.3 |
| S(12)-C(67)-H(67)   | 107.9 |
| C(68)-C(67)-S(12)   | 114.0 |
| C(68)-C(67)-H(67)   | 107.9 |
| C(68)-C(67)-C(72)   | 110.1 |
| C(72)-C(67)-S(12)   | 109.0 |
| C(72)-C(67)-H(67)   | 107.9 |
| C(67)-C(68)-H(68A)  | 109.0 |
| C(67)-C(68)-H(68B)  | 109.0 |
| C(67)-C(68)-C(69)   | 112.8 |
| H(68A)-C(68)-H(68B) | 107.8 |
| C(69)-C(68)-H(68A)  | 109.0 |
| C(69)-C(68)-H(68B)  | 109.0 |
| C(68)-C(69)-H(69A)  | 108.2 |
| C(68)-C(69)-H(69B)  | 108.2 |
| H(69A)-C(69)-H(69B) | 107.3 |
| C(70)-C(69)-C(68)   | 116.4 |
| C(70)-C(69)-H(69A)  | 108.2 |
| C(70)-C(69)-H(69B)  | 108.2 |
| C(69)-C(70)-H(70A)  | 112.0 |
| C(69)-C(70)-H(70B)  | 112.0 |
| C(69)-C(70)-C(71)   | 98.7  |
| H(70A)-C(70)-H(70B) | 109.7 |
| C(71)-C(70)-H(70A)  | 112.0 |
| C(71)-C(70)-H(70B)  | 112.0 |
| C(70)-C(71)-H(71A)  | 106.5 |
| C(70)-C(71)-H(71B)  | 106.5 |
| H(71A)-C(71)-H(71B) | 106.5 |

|                     |       |
|---------------------|-------|
| C(72)-C(71)-C(70)   | 123.4 |
| C(72)-C(71)-H(71A)  | 106.5 |
| C(72)-C(71)-H(71B)  | 106.5 |
| C(67)-C(72)-H(72A)  | 110.3 |
| C(67)-C(72)-H(72B)  | 110.3 |
| C(71)-C(72)-C(67)   | 107.2 |
| C(71)-C(72)-H(72A)  | 110.3 |
| C(71)-C(72)-H(72B)  | 110.3 |
| H(72A)-C(72)-H(72B) | 108.5 |
| S(13)-C(73)-H(73)   | 100.4 |
| C(74)-C(73)-S(13)   | 130.0 |
| C(74)-C(73)-H(73)   | 100.4 |
| C(78)-C(73)-S(13)   | 111.0 |
| C(78)-C(73)-H(73)   | 100.4 |
| C(78)-C(73)-C(74)   | 109.2 |
| C(73)-C(74)-H(74A)  | 109.6 |
| C(73)-C(74)-H(74B)  | 109.6 |
| C(73)-C(74)-C(75)   | 110.4 |
| H(74A)-C(74)-H(74B) | 108.1 |
| C(75)-C(74)-H(74A)  | 109.6 |
| C(75)-C(74)-H(74B)  | 109.6 |
| C(74)-C(75)-H(75A)  | 109.9 |
| C(74)-C(75)-H(75B)  | 109.9 |
| C(74)-C(75)-C(76)   | 109.0 |
| H(75A)-C(75)-H(75B) | 108.3 |
| C(76)-C(75)-H(75A)  | 109.9 |
| C(76)-C(75)-H(75B)  | 109.9 |
| C(75)-C(76)-H(76A)  | 109.9 |
| C(75)-C(76)-H(76B)  | 109.9 |
| C(75)-C(76)-C(77)   | 109.0 |

|                     |       |
|---------------------|-------|
| H(76A)-C(76)-H(76B) | 108.3 |
| C(77)-C(76)-H(76A)  | 109.9 |
| C(77)-C(76)-H(76B)  | 109.9 |
| C(76)-C(77)-H(77A)  | 109.9 |
| C(76)-C(77)-H(77B)  | 109.9 |
| H(77A)-C(77)-H(77B) | 108.3 |
| C(78)-C(77)-C(76)   | 109.1 |
| C(78)-C(77)-H(77A)  | 109.9 |
| C(78)-C(77)-H(77B)  | 109.9 |
| C(73)-C(78)-H(78A)  | 106.8 |
| C(73)-C(78)-H(78B)  | 106.8 |
| C(77)-C(78)-C(73)   | 122.1 |
| C(77)-C(78)-H(78A)  | 106.8 |
| C(77)-C(78)-H(78B)  | 106.8 |
| H(78A)-C(78)-H(78B) | 106.7 |
| S(14)-C(79)-H(79)   | 97.8  |
| C(80)-C(79)-S(14)   | 133.7 |
| C(80)-C(79)-H(79)   | 97.8  |
| C(84)-C(79)-S(14)   | 111.3 |
| C(84)-C(79)-H(79)   | 97.8  |
| C(84)-C(79)-C(80)   | 109.2 |
| C(79)-C(80)-H(80A)  | 109.4 |
| C(79)-C(80)-H(80B)  | 109.4 |
| H(80A)-C(80)-H(80B) | 108.0 |
| C(81)-C(80)-C(79)   | 111.2 |
| C(81)-C(80)-H(80A)  | 109.4 |
| C(81)-C(80)-H(80B)  | 109.4 |
| C(80)-C(81)-H(81A)  | 110.7 |
| C(80)-C(81)-H(81B)  | 110.7 |
| H(81A)-C(81)-H(81B) | 108.8 |

|                     |       |
|---------------------|-------|
| C(82)-C(81)-C(80)   | 105.1 |
| C(82)-C(81)-H(81A)  | 110.7 |
| C(82)-C(81)-H(81B)  | 110.7 |
| C(81)-C(82)-H(82A)  | 109.4 |
| C(81)-C(82)-H(82B)  | 109.4 |
| H(82A)-C(82)-H(82B) | 108.0 |
| C(83)-C(82)-C(81)   | 111.1 |
| C(83)-C(82)-H(82A)  | 109.4 |
| C(83)-C(82)-H(82B)  | 109.4 |
| C(82)-C(83)-H(83A)  | 109.5 |
| C(82)-C(83)-H(83B)  | 109.5 |
| C(82)-C(83)-C(84)   | 110.7 |
| H(83A)-C(83)-H(83B) | 108.1 |
| C(84)-C(83)-H(83A)  | 109.5 |
| C(84)-C(83)-H(83B)  | 109.5 |
| C(79)-C(84)-H(84A)  | 109.8 |
| C(79)-C(84)-H(84B)  | 109.8 |
| C(83)-C(84)-C(79)   | 109.5 |
| C(83)-C(84)-H(84A)  | 109.8 |
| C(83)-C(84)-H(84B)  | 109.8 |
| H(84A)-C(84)-H(84B) | 108.2 |
| S(15)-C(85)-H(85)   | 110.5 |
| C(86)-C(85)-S(15)   | 111.6 |
| C(86)-C(85)-H(85)   | 110.5 |
| C(86)-C(85)-C(90)   | 110.9 |
| C(90)-C(85)-S(15)   | 102.8 |
| C(90)-C(85)-H(85)   | 110.5 |
| C(85)-C(86)-H(86A)  | 109.5 |
| C(85)-C(86)-H(86B)  | 109.5 |
| H(86A)-C(86)-H(86B) | 108.0 |

|                     |       |
|---------------------|-------|
| C(87)-C(86)-C(85)   | 110.9 |
| C(87)-C(86)-H(86A)  | 109.5 |
| C(87)-C(86)-H(86B)  | 109.5 |
| C(86)-C(87)-H(87A)  | 109.6 |
| C(86)-C(87)-H(87B)  | 109.6 |
| C(86)-C(87)-C(88)   | 110.2 |
| H(87A)-C(87)-H(87B) | 108.1 |
| C(88)-C(87)-H(87A)  | 109.6 |
| C(88)-C(87)-H(87B)  | 109.6 |
| C(87)-C(88)-H(88A)  | 108.8 |
| C(87)-C(88)-H(88B)  | 108.8 |
| H(88A)-C(88)-H(88B) | 107.7 |
| C(89)-C(88)-C(87)   | 113.8 |
| C(89)-C(88)-H(88A)  | 108.8 |
| C(89)-C(88)-H(88B)  | 108.8 |
| C(88)-C(89)-H(89A)  | 108.9 |
| C(88)-C(89)-H(89B)  | 108.9 |
| C(88)-C(89)-C(90)   | 113.3 |
| H(89A)-C(89)-H(89B) | 107.7 |
| C(90)-C(89)-H(89A)  | 108.9 |
| C(90)-C(89)-H(89B)  | 108.9 |
| C(85)-C(90)-H(90A)  | 108.8 |
| C(85)-C(90)-H(90B)  | 108.8 |
| C(89)-C(90)-C(85)   | 114.0 |
| C(89)-C(90)-H(90A)  | 108.8 |
| C(89)-C(90)-H(90B)  | 108.8 |
| H(90A)-C(90)-H(90B) | 107.7 |
| S(16)-C(91)-H(91)   | 108.6 |
| C(92)-C(91)-S(16)   | 109.5 |
| C(92)-C(91)-H(91)   | 108.6 |

|                     |       |
|---------------------|-------|
| C(96)-C(91)-S(16)   | 107.4 |
| C(96)-C(91)-H(91)   | 108.6 |
| C(96)-C(91)-C(92)   | 114.1 |
| C(91)-C(92)-H(92A)  | 109.0 |
| C(91)-C(92)-H(92B)  | 109.0 |
| H(92A)-C(92)-H(92B) | 107.8 |
| C(93)-C(92)-C(91)   | 112.9 |
| C(93)-C(92)-H(92A)  | 109.0 |
| C(93)-C(92)-H(92B)  | 109.0 |
| C(92)-C(93)-H(93A)  | 110.9 |
| C(92)-C(93)-H(93B)  | 110.9 |
| C(92)-C(93)-C(94)   | 104.3 |
| H(93A)-C(93)-H(93B) | 108.9 |
| C(94)-C(93)-H(93A)  | 110.9 |
| C(94)-C(93)-H(93B)  | 110.9 |
| C(93)-C(94)-H(94A)  | 111.6 |
| C(93)-C(94)-H(94B)  | 111.6 |
| H(94A)-C(94)-H(94B) | 109.4 |
| C(95)-C(94)-C(93)   | 101.0 |
| C(95)-C(94)-H(94A)  | 111.6 |
| C(95)-C(94)-H(94B)  | 111.6 |
| C(94)-C(95)-H(95A)  | 109.7 |
| C(94)-C(95)-H(95B)  | 109.7 |
| C(94)-C(95)-C(96)   | 110.0 |
| H(95A)-C(95)-H(95B) | 108.2 |
| C(96)-C(95)-H(95A)  | 109.7 |
| C(96)-C(95)-H(95B)  | 109.7 |
| C(91)-C(96)-C(95)   | 111.7 |
| C(91)-C(96)-H(96A)  | 109.3 |
| C(91)-C(96)-H(96B)  | 109.3 |

|                      |       |
|----------------------|-------|
| C(95)-C(96)-H(96A)   | 109.3 |
| C(95)-C(96)-H(96B)   | 109.3 |
| H(96A)-C(96)-H(96B)  | 107.9 |
| S(17)-C(97)-H(97)    | 108.1 |
| C(98)-C(97)-S(17)    | 107.5 |
| C(98)-C(97)-H(97)    | 108.1 |
| C(98)-C(97)-C(102)   | 112.7 |
| C(102)-C(97)-S(17)   | 112.2 |
| C(102)-C(97)-H(97)   | 108.1 |
| C(97)-C(98)-H(98A)   | 108.6 |
| C(97)-C(98)-H(98B)   | 108.6 |
| H(98A)-C(98)-H(98B)  | 107.6 |
| C(99)-C(98)-C(97)    | 114.5 |
| C(99)-C(98)-H(98A)   | 108.6 |
| C(99)-C(98)-H(98B)   | 108.6 |
| C(98)-C(99)-H(99A)   | 109.2 |
| C(98)-C(99)-H(99B)   | 109.2 |
| C(98)-C(99)-C(100)   | 112.1 |
| H(99A)-C(99)-H(99B)  | 107.9 |
| C(100)-C(99)-H(99A)  | 109.2 |
| C(100)-C(99)-H(99B)  | 109.2 |
| C(99)-C(100)-H(10C)  | 108.9 |
| C(99)-C(100)-H(10D)  | 108.9 |
| C(99)-C(100)-C(101)  | 113.3 |
| H(10C)-C(100)-H(10D) | 107.7 |
| C(101)-C(100)-H(10C) | 108.9 |
| C(101)-C(100)-H(10D) | 108.9 |
| C(100)-C(101)-H(10E) | 110.0 |
| C(100)-C(101)-H(10F) | 110.0 |
| H(10E)-C(101)-H(10F) | 108.4 |

|                      |       |
|----------------------|-------|
| C(102)-C(101)-C(100) | 108.4 |
| C(102)-C(101)-H(10E) | 110.0 |
| C(102)-C(101)-H(10F) | 110.0 |
| C(97)-C(102)-H(10G)  | 109.4 |
| C(97)-C(102)-H(10H)  | 109.4 |
| C(101)-C(102)-C(97)  | 111.4 |
| C(101)-C(102)-H(10G) | 109.4 |
| C(101)-C(102)-H(10H) | 109.4 |
| H(10G)-C(102)-H(10H) | 108.0 |
| S(18)-C(103)-H(103)  | 109.9 |
| C(104)-C(103)-S(18)  | 104.6 |
| C(104)-C(103)-H(103) | 109.9 |
| C(108)-C(103)-S(18)  | 108.8 |
| C(108)-C(103)-H(103) | 109.9 |
| C(108)-C(103)-C(104) | 113.5 |
| C(103)-C(104)-H(10I) | 110.0 |
| C(103)-C(104)-H(10J) | 110.0 |
| H(10I)-C(104)-H(10J) | 108.4 |
| C(105)-C(104)-C(103) | 108.3 |
| C(105)-C(104)-H(10I) | 110.0 |
| C(105)-C(104)-H(10J) | 110.0 |
| C(104)-C(105)-H(10K) | 109.7 |
| C(104)-C(105)-H(10L) | 109.7 |
| C(104)-C(105)-C(106) | 109.8 |
| H(10K)-C(105)-H(10L) | 108.2 |
| C(106)-C(105)-H(10K) | 109.7 |
| C(106)-C(105)-H(10L) | 109.7 |
| C(105)-C(106)-H(10M) | 110.2 |
| C(105)-C(106)-H(10N) | 110.2 |
| H(10M)-C(106)-H(10N) | 108.5 |



|                      |       |
|----------------------|-------|
| C(107)-C(106)-C(105) | 107.3 |
| C(107)-C(106)-H(10M) | 110.2 |
| C(107)-C(106)-H(10N) | 110.2 |
| C(106)-C(107)-H(10O) | 107.8 |
| C(106)-C(107)-H(10P) | 107.8 |
| C(106)-C(107)-C(108) | 118.0 |
| H(10O)-C(107)-H(10P) | 107.1 |
| C(108)-C(107)-H(10O) | 107.8 |
| C(108)-C(107)-H(10P) | 107.8 |
| C(103)-C(108)-C(107) | 104.8 |
| C(103)-C(108)-H(10Q) | 110.8 |
| C(103)-C(108)-H(10R) | 110.8 |
| C(107)-C(108)-H(10Q) | 110.8 |
| C(107)-C(108)-H(10R) | 110.8 |
| H(10Q)-C(108)-H(10R) | 108.9 |
| S(19)-C(109)-H(109)  | 108.3 |
| C(110)-C(109)-S(19)  | 106.2 |
| C(110)-C(109)-H(109) | 108.3 |
| C(114)-C(109)-S(19)  | 113.8 |
| C(114)-C(109)-H(109) | 108.3 |
| C(114)-C(109)-C(110) | 111.9 |
| C(109)-C(110)-H(11C) | 110.2 |
| C(109)-C(110)-H(11D) | 110.2 |
| H(11C)-C(110)-H(11D) | 108.5 |
| C(111)-C(110)-C(109) | 107.5 |
| C(111)-C(110)-H(11C) | 110.2 |
| C(111)-C(110)-H(11D) | 110.2 |
| C(110)-C(111)-H(11E) | 109.7 |
| C(110)-C(111)-H(11F) | 109.7 |
| H(11E)-C(111)-H(11F) | 108.2 |

|                      |       |
|----------------------|-------|
| C(112)-C(111)-C(110) | 109.9 |
| C(112)-C(111)-H(11E) | 109.7 |
| C(112)-C(111)-H(11F) | 109.7 |
| C(111)-C(112)-H(11G) | 109.6 |
| C(111)-C(112)-H(11H) | 109.6 |
| C(111)-C(112)-C(113) | 110.4 |
| H(11G)-C(112)-H(11H) | 108.1 |
| C(113)-C(112)-H(11G) | 109.6 |
| C(113)-C(112)-H(11H) | 109.6 |
| C(112)-C(113)-H(11I) | 108.3 |
| C(112)-C(113)-H(11J) | 108.3 |
| H(11I)-C(113)-H(11J) | 107.4 |
| C(114)-C(113)-C(112) | 116.0 |
| C(114)-C(113)-H(11I) | 108.3 |
| C(114)-C(113)-H(11J) | 108.3 |
| C(109)-C(114)-C(113) | 112.7 |
| C(109)-C(114)-H(11K) | 109.1 |
| C(109)-C(114)-H(11L) | 109.1 |
| C(113)-C(114)-H(11K) | 109.1 |
| C(113)-C(114)-H(11L) | 109.1 |
| H(11K)-C(114)-H(11L) | 107.8 |
| S(20)-C(115)-H(115)  | 109.6 |
| C(116)-C(115)-S(20)  | 102.9 |
| C(116)-C(115)-H(115) | 109.6 |
| C(120)-C(115)-S(20)  | 116.7 |
| C(120)-C(115)-H(115) | 109.6 |
| C(120)-C(115)-C(116) | 108.0 |
| C(115)-C(116)-H(11M) | 110.0 |
| C(115)-C(116)-H(11N) | 110.0 |
| H(11M)-C(116)-H(11N) | 108.4 |

|                      |       |
|----------------------|-------|
| C(117)-C(116)-C(115) | 108.6 |
| C(117)-C(116)-H(11M) | 110.0 |
| C(117)-C(116)-H(11N) | 110.0 |
| C(116)-C(117)-H(11O) | 111.7 |
| C(116)-C(117)-H(11P) | 111.7 |
| C(116)-C(117)-C(118) | 100.3 |
| H(11O)-C(117)-H(11P) | 109.5 |
| C(118)-C(117)-H(11O) | 111.7 |
| C(118)-C(117)-H(11P) | 111.7 |
| C(117)-C(118)-H(11Q) | 108.6 |
| C(117)-C(118)-H(11R) | 108.6 |
| H(11Q)-C(118)-H(11R) | 107.5 |
| C(119)-C(118)-C(117) | 114.8 |
| C(119)-C(118)-H(11Q) | 108.6 |
| C(119)-C(118)-H(11R) | 108.6 |
| C(118)-C(119)-H(11S) | 109.4 |
| C(118)-C(119)-H(11T) | 109.4 |
| H(11S)-C(119)-H(11T) | 108.0 |
| C(120)-C(119)-C(118) | 111.3 |
| C(120)-C(119)-H(11S) | 109.4 |
| C(120)-C(119)-H(11T) | 109.4 |
| C(115)-C(120)-H(12C) | 109.9 |
| C(115)-C(120)-H(12D) | 109.9 |
| C(119)-C(120)-C(115) | 108.8 |
| C(119)-C(120)-H(12C) | 109.9 |
| C(119)-C(120)-H(12D) | 109.9 |
| H(12C)-C(120)-H(12D) | 108.3 |
| S(21)-C(121)-H(121)  | 109.2 |
| C(122)-C(121)-S(21)  | 106.5 |
| C(122)-C(121)-H(121) | 109.2 |

|                      |       |
|----------------------|-------|
| C(126)-C(121)-S(21)  | 108.1 |
| C(126)-C(121)-H(121) | 109.2 |
| C(126)-C(121)-C(122) | 114.4 |
| C(121)-C(122)-H(12E) | 109.9 |
| C(121)-C(122)-H(12F) | 109.9 |
| C(121)-C(122)-C(123) | 108.8 |
| H(12E)-C(122)-H(12F) | 108.3 |
| C(123)-C(122)-H(12E) | 109.9 |
| C(123)-C(122)-H(12F) | 109.9 |
| C(122)-C(123)-H(12G) | 110.0 |
| C(122)-C(123)-H(12H) | 110.0 |
| H(12G)-C(123)-H(12H) | 108.4 |
| C(124)-C(123)-C(122) | 108.4 |
| C(124)-C(123)-H(12G) | 110.0 |
| C(124)-C(123)-H(12H) | 110.0 |
| C(123)-C(124)-H(12I) | 108.4 |
| C(123)-C(124)-H(12J) | 108.4 |
| H(12I)-C(124)-H(12J) | 107.4 |
| C(125)-C(124)-C(123) | 115.6 |
| C(125)-C(124)-H(12I) | 108.4 |
| C(125)-C(124)-H(12J) | 108.4 |
| C(124)-C(125)-H(12K) | 109.8 |
| C(124)-C(125)-H(12L) | 109.8 |
| C(124)-C(125)-C(126) | 109.3 |
| H(12K)-C(125)-H(12L) | 108.3 |
| C(126)-C(125)-H(12K) | 109.8 |
| C(126)-C(125)-H(12L) | 109.8 |
| C(121)-C(126)-C(125) | 116.6 |
| C(121)-C(126)-H(12M) | 108.2 |
| C(121)-C(126)-H(12N) | 108.2 |

|                      |       |
|----------------------|-------|
| C(125)-C(126)-H(12M) | 108.2 |
| C(125)-C(126)-H(12N) | 108.2 |
| H(12M)-C(126)-H(12N) | 107.3 |
| S(22)-C(127)-H(127)  | 109.0 |
| C(128)-C(127)-S(22)  | 110.3 |
| C(128)-C(127)-H(127) | 109.0 |
| C(128)-C(127)-C(132) | 111.0 |
| C(132)-C(127)-S(22)  | 108.5 |
| C(132)-C(127)-H(127) | 109.0 |
| C(127)-C(128)-H(12O) | 109.8 |
| C(127)-C(128)-H(12P) | 109.8 |
| C(127)-C(128)-C(129) | 109.5 |
| H(12O)-C(128)-H(12P) | 108.2 |
| C(129)-C(128)-H(12O) | 109.8 |
| C(129)-C(128)-H(12P) | 109.8 |
| C(130)-C(129)-C(128) | 105.5 |
| C(129)-C(130)-H(13A) | 109.4 |
| C(129)-C(130)-H(13B) | 109.4 |
| H(13A)-C(130)-H(13B) | 108.0 |
| C(131)-C(130)-C(129) | 111.0 |
| C(131)-C(130)-H(13A) | 109.4 |
| C(131)-C(130)-H(13B) | 109.4 |
| C(130)-C(131)-H(13C) | 109.4 |
| C(130)-C(131)-H(13D) | 109.4 |
| C(130)-C(131)-C(132) | 111.0 |
| H(13C)-C(131)-H(13D) | 108.0 |
| C(132)-C(131)-H(13C) | 109.4 |
| C(132)-C(131)-H(13D) | 109.4 |
| C(127)-C(132)-H(13E) | 109.4 |
| C(127)-C(132)-H(13F) | 109.4 |

|                      |       |
|----------------------|-------|
| C(131)-C(132)-C(127) | 111.3 |
| C(131)-C(132)-H(13E) | 109.4 |
| C(131)-C(132)-H(13F) | 109.4 |
| H(13E)-C(132)-H(13F) | 108.0 |
| S(23)-C(133)-H(133)  | 109.2 |
| C(134)-C(133)-S(23)  | 110.4 |
| C(134)-C(133)-H(133) | 109.2 |
| C(138)-C(133)-S(23)  | 109.5 |
| C(138)-C(133)-H(133) | 109.2 |
| C(138)-C(133)-C(134) | 109.4 |
| C(133)-C(134)-H(13G) | 109.3 |
| C(133)-C(134)-H(13H) | 109.3 |
| H(13G)-C(134)-H(13H) | 108.0 |
| C(135)-C(134)-C(133) | 111.5 |
| C(135)-C(134)-H(13G) | 109.3 |
| C(135)-C(134)-H(13H) | 109.3 |
| C(134)-C(135)-H(13I) | 110.4 |
| C(134)-C(135)-H(13J) | 110.4 |
| C(134)-C(135)-C(136) | 106.6 |
| H(13I)-C(135)-H(13J) | 108.6 |
| C(136)-C(135)-H(13I) | 110.4 |
| C(136)-C(135)-H(13J) | 110.4 |
| C(135)-C(136)-H(13K) | 111.0 |
| C(135)-C(136)-H(13L) | 111.0 |
| H(13K)-C(136)-H(13L) | 109.0 |
| C(137)-C(136)-C(135) | 103.9 |
| C(137)-C(136)-H(13K) | 111.0 |
| C(137)-C(136)-H(13L) | 111.0 |
| C(136)-C(137)-H(13M) | 108.8 |
| C(136)-C(137)-H(13N) | 108.8 |

|                      |       |
|----------------------|-------|
| C(136)-C(137)-C(138) | 113.9 |
| H(13M)-C(137)-H(13N) | 107.7 |
| C(138)-C(137)-H(13M) | 108.8 |
| C(138)-C(137)-H(13N) | 108.8 |
| C(133)-C(138)-C(137) | 103.5 |
| C(133)-C(138)-H(13O) | 111.1 |
| C(133)-C(138)-H(13P) | 111.1 |
| C(137)-C(138)-H(13O) | 111.1 |
| C(137)-C(138)-H(13P) | 111.1 |
| H(13O)-C(138)-H(13P) | 109.0 |
| S(24)-C(139)-H(139)  | 111.3 |
| C(140)-C(139)-S(24)  | 103.1 |
| C(140)-C(139)-H(139) | 111.3 |
| C(144)-C(139)-S(24)  | 107.6 |
| C(144)-C(139)-H(139) | 111.3 |
| C(144)-C(139)-C(140) | 111.8 |
| C(139)-C(140)-H(14C) | 110.2 |
| C(139)-C(140)-H(14D) | 110.2 |
| C(139)-C(140)-C(141) | 107.6 |
| H(14C)-C(140)-H(14D) | 108.5 |
| C(141)-C(140)-H(14C) | 110.2 |
| C(141)-C(140)-H(14D) | 110.2 |
| C(140)-C(141)-H(14E) | 111.2 |
| C(140)-C(141)-H(14F) | 111.2 |
| C(140)-C(141)-C(142) | 102.7 |
| H(14E)-C(141)-H(14F) | 109.1 |
| C(142)-C(141)-H(14E) | 111.2 |
| C(142)-C(141)-H(14F) | 111.2 |
| C(141)-C(142)-H(14G) | 111.2 |
| C(141)-C(142)-H(14H) | 111.2 |

|                      |       |
|----------------------|-------|
| C(141)-C(142)-C(143) | 103.0 |
| H(14G)-C(142)-H(14H) | 109.1 |
| C(143)-C(142)-H(14G) | 111.2 |
| C(143)-C(142)-H(14H) | 111.2 |
| C(142)-C(143)-H(14I) | 109.7 |
| C(142)-C(143)-H(14J) | 109.7 |
| H(14I)-C(143)-H(14J) | 108.2 |
| C(144)-C(143)-C(142) | 109.7 |
| C(144)-C(143)-H(14I) | 109.7 |
| C(144)-C(143)-H(14J) | 109.7 |
| C(139)-C(144)-C(143) | 107.2 |
| C(139)-C(144)-H(14K) | 110.3 |
| C(139)-C(144)-H(14L) | 110.3 |
| C(143)-C(144)-H(14K) | 110.3 |
| C(143)-C(144)-H(14L) | 110.3 |
| H(14K)-C(144)-H(14L) | 108.5 |
| S(25)-C(145)-H(145)  | 113.2 |
| C(146)-C(145)-S(25)  | 105.0 |
| C(146)-C(145)-H(145) | 113.2 |
| C(150)-C(145)-S(25)  | 104.8 |
| C(150)-C(145)-H(145) | 113.2 |
| C(150)-C(145)-C(146) | 106.5 |
| C(145)-C(146)-H(14M) | 110.1 |
| C(145)-C(146)-H(14N) | 110.1 |
| C(145)-C(146)-C(147) | 107.9 |
| H(14M)-C(146)-H(14N) | 108.4 |
| C(147)-C(146)-H(14M) | 110.1 |
| C(147)-C(146)-H(14N) | 110.1 |
| C(146)-C(147)-H(14O) | 110.6 |
| C(146)-C(147)-H(14P) | 110.6 |



|                      |       |
|----------------------|-------|
| H(14O)-C(147)-H(14P) | 108.8 |
| C(148)-C(147)-C(146) | 105.5 |
| C(148)-C(147)-H(14O) | 110.6 |
| C(148)-C(147)-H(14P) | 110.6 |
| C(147)-C(148)-H(14Q) | 108.6 |
| C(147)-C(148)-H(14R) | 108.6 |
| C(147)-C(148)-C(149) | 114.8 |
| H(14Q)-C(148)-H(14R) | 107.5 |
| C(149)-C(148)-H(14Q) | 108.6 |
| C(149)-C(148)-H(14R) | 108.6 |
| C(148)-C(149)-H(14S) | 110.4 |
| C(148)-C(149)-H(14T) | 110.4 |
| C(148)-C(149)-C(150) | 106.6 |
| H(14S)-C(149)-H(14T) | 108.6 |
| C(150)-C(149)-H(14S) | 110.4 |
| C(150)-C(149)-H(14T) | 110.4 |
| C(145)-C(150)-C(149) | 107.3 |
| C(145)-C(150)-H(15C) | 110.3 |
| C(145)-C(150)-H(15D) | 110.3 |
| C(149)-C(150)-H(15C) | 110.3 |
| C(149)-C(150)-H(15D) | 110.3 |
| H(15C)-C(150)-H(15D) | 108.5 |
| S(26)-C(151)-H(151)  | 107.1 |
| C(152)-C(151)-S(26)  | 112.3 |
| C(152)-C(151)-H(151) | 107.1 |
| C(152)-C(151)-C(156) | 109.7 |
| C(156)-C(151)-S(26)  | 113.1 |
| C(156)-C(151)-H(151) | 107.1 |
| C(151)-C(152)-H(15E) | 108.4 |
| C(151)-C(152)-H(15F) | 108.4 |

|                      |       |
|----------------------|-------|
| C(151)-C(152)-C(153) | 115.6 |
| H(15E)-C(152)-H(15F) | 107.4 |
| C(153)-C(152)-H(15E) | 108.4 |
| C(153)-C(152)-H(15F) | 108.4 |
| C(152)-C(153)-H(15G) | 111.4 |
| C(152)-C(153)-H(15H) | 111.4 |
| H(15G)-C(153)-H(15H) | 109.3 |
| C(154)-C(153)-C(152) | 101.7 |
| C(154)-C(153)-H(15G) | 111.4 |
| C(154)-C(153)-H(15H) | 111.4 |
| C(153)-C(154)-H(15I) | 110.0 |
| C(153)-C(154)-H(15J) | 110.0 |
| H(15I)-C(154)-H(15J) | 108.4 |
| C(155)-C(154)-C(153) | 108.3 |
| C(155)-C(154)-H(15I) | 110.0 |
| C(155)-C(154)-H(15J) | 110.0 |
| C(154)-C(155)-H(15K) | 110.7 |
| C(154)-C(155)-H(15L) | 110.7 |
| H(15K)-C(155)-H(15L) | 108.8 |
| C(156)-C(155)-C(154) | 105.2 |
| C(156)-C(155)-H(15K) | 110.7 |
| C(156)-C(155)-H(15L) | 110.7 |
| C(151)-C(156)-H(15M) | 109.2 |
| C(151)-C(156)-H(15N) | 109.2 |
| C(155)-C(156)-C(151) | 111.9 |
| C(155)-C(156)-H(15M) | 109.2 |
| C(155)-C(156)-H(15N) | 109.2 |
| H(15M)-C(156)-H(15N) | 107.9 |

---
